# Supplementary material for: Anionic photochemical rearrangement of 3-hydroxypyran-4-ones bearing oxazol-2-one fragment
Source: Royal Society of Chemistry journal article supplement (doi:10.1039/d3ob01957h), 2024-01-01
Supplement: d3ob01957h1.pdf [file d3ob01957h1.pdf]

Supporting Information

**Anionic photochemical rearrangement of  
3-hydroxypyran-4-ones bearing oxazol-2-one fragment**

Andrey N. Komogortsev, Valeriya G. Melekhina, Boris V. Lichitskii

N. D. Zelinsky Institute of Organic Chemistry, Russian Academy of Science, Leninsky Pr., 47,  
Moscow 119991, Russian Federation

## Table of content

|                                                                                  |    |
|----------------------------------------------------------------------------------|----|
| 1. General information .....                                                     | 3  |
| 2. Experimental procedure .....                                                  | 4  |
| 4. Copies of $^1\text{H}$ and $^{13}\text{C}$ NMR spectra for all compounds..... | 11 |
| 5. Copies of HRMS for all compounds .....                                        | 31 |
| 6. X-ray crystallographic data and refinement details for compound 4a.....       | 49 |
| 7. References.....                                                               | 58 |

## 1. General information

Unless otherwise stated, all starting chemicals were commercially available and were used as received. Compounds **1** were prepared according to a procedure described previously.<sup>1</sup> NMR spectra were recorded with Bruker AM 300 (300 MHz), Bruker DRX 500 (500 MHz) and Bruker AV 600 (600 MHz) spectrometers in DMSO-*d*<sub>6</sub>. Chemical shifts (ppm) are given relative to solvent signals (DMSO-*d*<sub>6</sub>: 2.50 ppm (<sup>1</sup>H NMR) and 39.52 ppm (<sup>13</sup>C NMR)). High-resolution mass spectra (HRMS) were obtained on a Bruker micrOTOF II instrument using electrospray ionization (ESI). The melting points were determined on a Kofler hot stage. Magnetic stirrer IKA C-MAG HS 7 was used for the reactions that require heating. UV/Vis spectra were recorded with Agilent Cary 60.

Photochemical reactions were performed in common glassware. Irradiation was carried out with a strip of 24 W 450 nm LED at room temperature in air atmosphere.

### Compounds **1**:

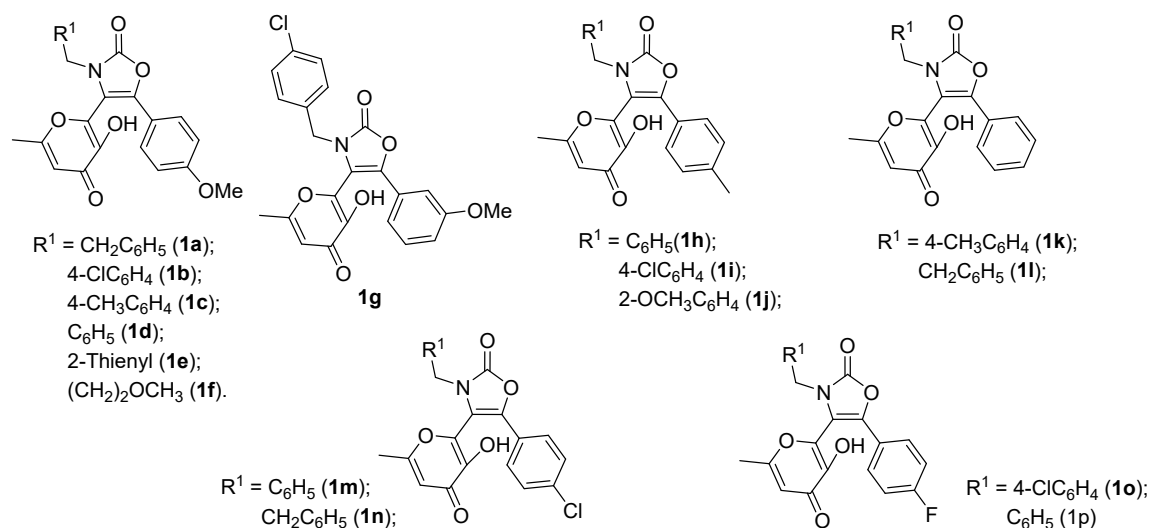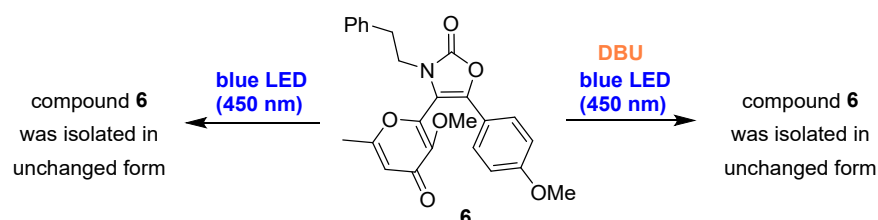

**Scheme S1.** Photochemical behavior of compound **6**

## 2. Experimental procedure

### General experimental procedure for the synthesis of target photoproducts **4**

The mixture of compound **1** (0.5 mmol) and DBU (0.5 mmol, 0.08 g) in DMSO (5 mL) was irradiated in common glassware with a strip of 24 W 450 nm LED for 6 h. Then AcOH (2 mmol, 0.12 g) was added to the obtained solution. Further, the reaction mixture was poured into water (100 mL) and left overnight. The formed precipitate was filtered off and washed with H<sub>2</sub>O (3 × 15 mL) to give the target product **4**.

### Experimental procedure for the synthesis of methylated derivative **7**

A mixture of compound **4h** (1 mmol, 0.39 g), K<sub>2</sub>CO<sub>3</sub> (2 mmol, 0.27 g) and MeI (3 mmol, 0.43 g) in DMF (5 mL) was stirred at room temperature for 8 h. Then the solvent was removed under reduced pressure, H<sub>2</sub>O (20 mL) was added to the obtained residue and left overnight. The resulting precipitate was filtered off and washed with H<sub>2</sub>O (3 × 15 mL) to give the product **7**.

### Experimental procedure for the synthesis of compound **10**

A mixture of compound **4a** (1 mmol, 0.42 g), 4-methoxyphenylglyoxal hydrate **8** (1.5 mmol, 0.27 g), Meldrum's acid **9** (2 mmol, 0.29 g) and Et<sub>3</sub>N (2 mmol, 0.2 g) in MeCN (6 mL) was kept for 24 h at room temperature. Then, the reaction mixture was evaporated in vacuo. To obtained residue HCl<sub>conc</sub> (2 mL) and of AcOH (4 mL) were added and the solution was refluxed for 15 min. The resulting solution was poured into water (100 mL) and the formed precipitate was collected by filtration. The target product was recrystallized from MeCN (3 mL).

### 3. Characterization data for starting compounds 4

#### 4-(3-Hydroxy-5-methyl-2-oxo-2H-pyran-6-yl)-5-(4-methoxyphenyl)-3-phenethylloxazol-2(3H)-one (4a)

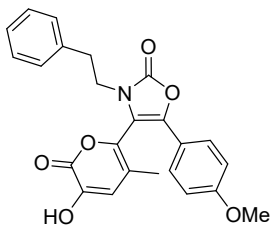

Yellowish powder; yield 88% (0.18 g); mp 94-96 °C.  $^1\text{H}$  NMR (300 MHz,  $\text{DMSO-}d_6$ )  $\delta$  10.59 (br.s, 1H), 7.28 (d,  $J = 8.8$  Hz, 2H), 7.26 – 7.10 (m, 5H), 6.97 (d,  $J = 8.9$  Hz, 2H), 6.60 (s, 1H), 3.76 (s, 3H), 3.75 – 3.69 (m, 2H), 2.87 (t,  $J = 7.3$  Hz, 2H), 1.58 (s, 3H).  $^{13}\text{C}$   $\{^1\text{H}\}$  NMR (151 MHz,  $\text{DMSO-}d_6$ )  $\delta$  159.6, 158.8, 152.9, 143.7, 137.6, 136.9, 133.9, 128.6, 128.5, 126.5, 125.9, 119.6, 119.1, 119.0, 114.6, 113.0, 55.2, 43.6, 33.9, 15.5. HRMS (ESI-TOF)  $m/z$ :  $[\text{M}+\text{H}]^+$  Calcd for  $\text{C}_{24}\text{H}_{22}\text{NO}_6$ : 420.1442; Found: 420.1449.

#### 3-(4-Chlorobenzyl)-4-(3-hydroxy-5-methyl-2-oxo-2H-pyran-6-yl)-5-(4-methoxyphenyl)oxazol-2(3H)-one (4b)

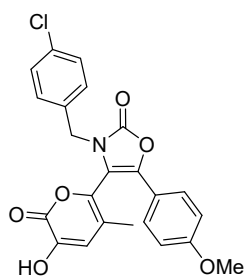

Yellowish powder; yield 90% (0.2 g); mp 109-111 °C.  $^1\text{H}$  NMR (300 MHz,  $\text{DMSO-}d_6$ )  $\delta$  7.40 – 7.25 (m, 4H), 7.19 (d,  $J = 8.2$  Hz, 2H), 6.97 (d,  $J = 8.5$  Hz, 2H), 6.49 (s, 1H), 4.71 (s, 2H), 3.75 (s, 3H), 1.52 (s, 3H).  $^{13}\text{C}$   $\{^1\text{H}\}$  NMR (151 MHz,  $\text{DMSO-}d_6$ )  $\delta$  159.7, 158.8, 153.3, 144.1, 137.3, 135.0, 133.4, 132.4, 129.2, 128.4, 125.9, 119.9, 119.0, 118.3, 114.7, 112.7, 55.2, 45.0, 15.3. HRMS (ESI-TOF)  $m/z$ :  $[\text{M}+\text{H}]^+$  Calcd for  $\text{C}_{23}\text{H}_{19}\text{ClNO}_6$ : 440.0895; Found: 440.0894.

#### 4-(3-Hydroxy-5-methyl-2-oxo-2H-pyran-6-yl)-5-(4-methoxyphenyl)-3-(4-methylbenzyl)oxazol-2(3H)-one (4c)

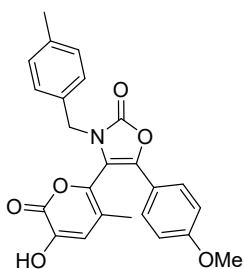

Yellowish powder; yield 85% (0.18 g); mp 85-87 °C.  $^1\text{H}$  NMR (300 MHz,  $\text{DMSO-}d_6$ )  $\delta$  7.29 (d,  $J = 8.4$  Hz, 2H), 7.08 (d,  $J = 7.8$  Hz, 2H), 7.03 – 6.88 (m, 4H), 6.47 (s, 1H), 4.77 – 4.54 (m, 2H), 3.75 (s, 3H), 2.24 (s, 3H), 1.49 (s, 3H).  $^{13}\text{C}$   $\{^1\text{H}\}$  NMR (75 MHz,  $\text{DMSO-}d_6$ )  $\delta$  159.7, 158.9, 153.3, 144.0, 137.2, 137.0, 133.5, 132.9, 129.0, 127.3, 125.8, 119.8, 119.0, 118.4, 114.7, 112.8, 55.2, 45.4, 20.7, 15.2. HRMS (ESI-TOF)  $m/z$ :  $[\text{M}+\text{K}]^+$  Calcd for  $\text{C}_{24}\text{H}_{21}\text{NO}_6\text{K}$ : 458.1000; Found: 458.0988.

**3-Benzyl-4-(3-hydroxy-5-methyl-2-oxo-2H-pyran-6-yl)-5-(4-methoxyphenyl)oxazol-2(3H)-one (4d)**

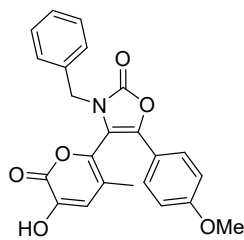

Yellowish powder; yield 85% (0.17 g); mp 119-121 °C. <sup>1</sup>H NMR (300 MHz, DMSO-*d*<sub>6</sub>) δ 7.35 – 7.22 (m, 5H), 7.13 (d, *J* = 6.9 Hz, 2H), 6.97 (d, *J* = 8.4 Hz, 2H), 6.39 (s, 1H), 4.83 – 4.60 (m, 2H), 3.75 (s, 3H), 1.47 (s, 3H). <sup>13</sup>C {<sup>1</sup>H} NMR (151 MHz, DMSO-*d*<sub>6</sub>) δ 159.7, 158.8, 153.4, 143.9, 137.3, 136.0, 133.6, 128.5, 127.8, 127.3, 125.9, 119.8, 119.0, 118.5, 114.7, 112.8, 55.3, 45.7, 15.3. HRMS (ESI-TOF) *m/z*: [M+K]<sup>+</sup> Calcd for C<sub>23</sub>H<sub>19</sub>NO<sub>6</sub>K: 444.0844; Found: 444.0835.

**4-(3-Hydroxy-5-methyl-2-oxo-2H-pyran-6-yl)-5-(4-methoxyphenyl)-3-(thiophen-2-ylmethyl)oxazol-2(3H)-one (4e)**

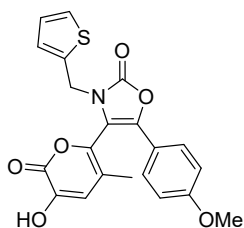

Yellowish powder; yield 86% (0.18 g); mp 155-157 °C. <sup>1</sup>H NMR (300 MHz, DMSO-*d*<sub>6</sub>) δ 10.66 (br.s, 1H), 7.53 – 7.22 (m, 3H), 7.14 – 6.77 (m, 4H), 6.56 (s, 1H), 4.89 (s, 2H), 3.75 (s, 3H), 1.56 (s, 3H). <sup>13</sup>C {<sup>1</sup>H} NMR (75 MHz, DMSO-*d*<sub>6</sub>) δ 159.7, 158.8, 152.8, 143.9, 137.9, 137.3, 133.5, 127.2, 126.9, 126.6, 125.9, 119.9, 118.9, 118.6, 114.7, 112.5, 55.2, 40.5, 15.3. HRMS (ESI-TOF) *m/z*: [M+H]<sup>+</sup> Calcd for C<sub>21</sub>H<sub>18</sub>NO<sub>6</sub>S: 412.0849; Found: 412.0858.

**4-(3-Hydroxy-5-methyl-2-oxo-2H-pyran-6-yl)-5-(4-methoxyphenyl)-3-(3-methoxypropyl)oxazol-2(3H)-one (4f)**

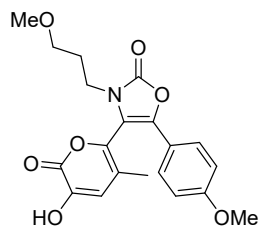

Yellowish powder; yield 78% (0.15 g); mp 88-90 °C. <sup>1</sup>H NMR (300 MHz, DMSO-*d*<sub>6</sub>) δ 10.64 (br.s, 1H), 7.30 (d, *J* = 8.5 Hz, 2H), 6.98 (d, *J* = 8.5 Hz, 2H), 6.66 (s, 1H), 3.76 (s, 3H), 3.62 – 3.47 (m, 3H), 3.34 – 3.24 (m, 3H), 3.14 (s, 3H), 1.75 (s, 3H). <sup>13</sup>C {<sup>1</sup>H} NMR (126 MHz, DMSO-*d*<sub>6</sub>) δ 159.6, 158.9, 153.1, 143.8, 137.0, 134.0, 125.8, 119.7, 119.2, 118.9, 114.7, 113.1, 68.8, 57.9, 55.2, 39.69, 28.2, 15.5. HRMS (ESI-TOF) *m/z*: [M+H]<sup>+</sup> Calcd for C<sub>20</sub>H<sub>22</sub>NO<sub>7</sub>: 388.1391; Found: 388.1393.

**3-(4-Chlorobenzyl)-4-(3-hydroxy-5-methyl-2-oxo-2H-pyran-6-yl)-5-(3-methoxyphenyl)oxazol-2(3H)-one (4g)**

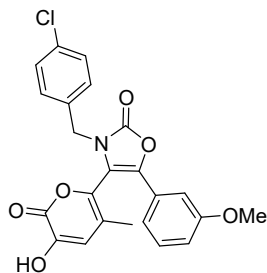

Yellowish powder; yield 81% (0.18 g); mp 96-98 °C. <sup>1</sup>H NMR (300 MHz, DMSO-*d*<sub>6</sub>) δ 10.65 (br. s, 1H), 7.40 – 7.29 (m, 3H), 7.21 (d, *J* = 8.2 Hz, 2H), 6.93 (d, *J* = 8.5 Hz, 2H), 6.86 (s, 1H), 6.52 (s, 1H), 4.73 (s, 2H), 3.71 (s, 3H), 1.56 (s, 3H). <sup>13</sup>C {<sup>1</sup>H} NMR (75 MHz, DMSO-*d*<sub>6</sub>) δ 159.5, 158.6, 153.2, 144.0, 136.8, 134.9, 133.1, 132.4, 130.5, 129.2, 128.5, 127.7, 120.2, 118.3, 116.4, 114.8, 114.7, 109.2, 55.1, 45.0, 15.3. HRMS (ESI-TOF) *m/z*: [M+H]<sup>+</sup> Calcd for C<sub>23</sub>H<sub>19</sub>ClNO<sub>6</sub>: 440.0895; Found: 440.0891.

**3-Benzyl-4-(3-hydroxy-5-methyl-2-oxo-2H-pyran-6-yl)-5-(*p*-tolyl)oxazol-2(3H)-one (4h)**

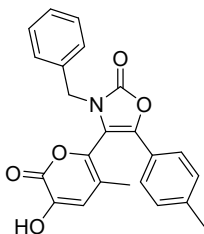

Yellowish powder; yield 82% (0.16 g); mp 124-126 °C. <sup>1</sup>H NMR (300 MHz, DMSO-*d*<sub>6</sub>) δ 10.57 (br.s, 1H), 7.33 – 7.14 (m, 9H), 6.46 (s, 1H), 4.84 – 4.58 (m, 2H), 2.28 (s, 3H), 1.47 (s, 3H). <sup>13</sup>C {<sup>1</sup>H} NMR (75 MHz, DMSO-*d*<sub>6</sub>) δ 158.7, 153.3, 143.8, 138.7, 137.2, 135.9, 133.5, 129.7, 128.5, 127.7, 127.3, 124.1, 123.8, 119.8, 118.5, 113.7, 45.7, 20.9, 15.2. HRMS (ESI-TOF) *m/z*: [M+H]<sup>+</sup> Calcd for C<sub>23</sub>H<sub>20</sub>NO<sub>5</sub>: 390.1336; Found: 390.1336.

**3-(4-Chlorobenzyl)-4-(3-hydroxy-5-methyl-2-oxo-2H-pyran-6-yl)-5-(*p*-tolyl)oxazol-2(3H)-one (4i)**

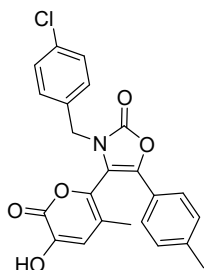

Yellowish powder; yield 92% (0.2 g); mp 101-103 °C. <sup>1</sup>H NMR (300 MHz, DMSO-*d*<sub>6</sub>) δ 7.35 (d, *J* = 8.1 Hz, 2H), 7.28 – 7.14 (m, 6H), 6.49 (s, 1H), 4.72 (s, 2H), 2.28 (s, 3H), 1.52 (s, 3H). <sup>13</sup>C {<sup>1</sup>H} NMR (126 MHz, DMSO-*d*<sub>6</sub>) δ 158.7, 153.3, 144.0, 138.8, 137.3, 135.0, 133.3, 132.4, 129.8, 129.2, 128.5, 124.1, 123.8, 119.9, 118.4, 113.7, 45.0, 20.9, 15.6. HRMS (ESI-TOF) *m/z*: [M+H]<sup>+</sup> Calcd for C<sub>23</sub>H<sub>19</sub>ClNO<sub>5</sub>: 424.0946; Found: 424.0935.

**4-(3-Hydroxy-5-methyl-2-oxo-2H-pyran-6-yl)-3-(2-methoxybenzyl)-5-(*p*-tolyl)oxazol-2(3H)-one (4j)**

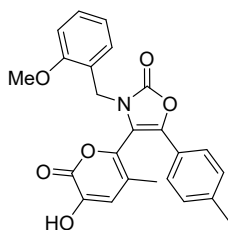

Yellowish powder; yield 79% (0.17 g); mp 103-105 °C. <sup>1</sup>H NMR (300 MHz, DMSO-*d*<sub>6</sub>) δ 7.36 – 7.14 (m, 5H), 7.03 (d, *J* = 7.4 Hz, 1H), 6.91 (d, *J* = 8.3 Hz, 1H), 6.87 – 6.79 (m, 1H), 6.43 (s, 1H), 4.73 (s, 2H), 3.64 (s, 3H), 2.28 (s, 3H), 1.40 (s, 3H). <sup>13</sup>C {<sup>1</sup>H} NMR (126 MHz, DMSO-*d*<sub>6</sub>) δ 158.8, 156.6, 153.4, 143.7, 138.7, 136.9, 133.7, 129.8, 129.4, 128.9, 124.0, 123.9, 123.2, 120.3, 119.4, 118.5, 113.9, 110.8, 55.4, 40.9, 20.9, 15.0. HRMS (ESI-TOF) *m/z*: [M+H]<sup>+</sup> Calcd for C<sub>24</sub>H<sub>21</sub>NO<sub>6</sub>: 420.1442; Found: 420.1439.

**4-(3-Hydroxy-5-methyl-2-oxo-2H-pyran-6-yl)-3-(4-methylbenzyl)-5-phenyloxazol-2(3H)-one (4k)**

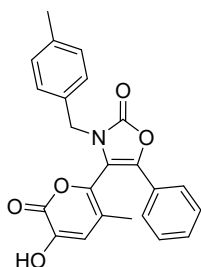

Yellowish powder; yield 80% (0.16 g); mp 94-96 °C. <sup>1</sup>H NMR (300 MHz, DMSO-*d*<sub>6</sub>) δ 7.51 – 7.29 (m, 5H), 7.09 (d, *J* = 7.8 Hz, 2H), 7.02 (d, *J* = 7.8 Hz, 2H), 6.49 (s, 1H), 4.81 – 4.50 (m, 2H), 2.24 (s, 3H), 1.50 (s, 3H). <sup>13</sup>C {<sup>1</sup>H} NMR (75 MHz, DMSO-*d*<sub>6</sub>) δ 158.7, 153.3, 144.0, 137.1, 136.9, 133.3, 132.8, 129.2, 129.0, 128.9, 127.3, 126.5, 124.1, 120.0, 118.4, 114.5, 45.5, 20.7, 15.2. HRMS (ESI-TOF) *m/z*: [M+H]<sup>+</sup> Calcd for C<sub>23</sub>H<sub>20</sub>NO<sub>5</sub>: 390.1336; Found: 390.1327.

**4-(3-Hydroxy-5-methyl-2-oxo-2H-pyran-6-yl)-3-phenethyl-5-phenyloxazol-2(3H)-one (4l)**

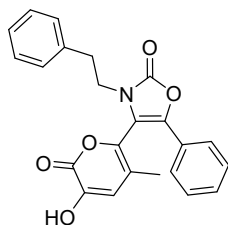

Yellowish powder; yield 84% (0.16 g); mp 82-84 °C. <sup>1</sup>H NMR (300 MHz, DMSO-*d*<sub>6</sub>) δ 10.70 (br.s, 1H), 7.44 – 7.32 (m, 5H), 7.26 – 7.17 (m, 3H), 7.13 (d, *J* = 7.4 Hz, 2H), 6.61 (s, 1H), 3.75 (t, *J* = 7.3 Hz, 2H), 2.88 (t, *J* = 7.3 Hz, 2H), 1.58 (s, 3H). <sup>13</sup>C {<sup>1</sup>H} NMR (75 MHz, DMSO-*d*<sub>6</sub>) δ 158.8, 152.9, 143.9, 137.6, 136.6, 133.6, 129.3, 128.9, 128.6, 128.5, 126.6, 126.6, 124.2, 119.8, 118.9, 114.8, 43.7, 33.9, 15.5. HRMS (ESI-TOF) *m/z*: [M+H]<sup>+</sup> Calcd for C<sub>23</sub>H<sub>20</sub>NO<sub>5</sub>: 390.1336; Found: 390.1330.

**3-Benzyl-5-(4-chlorophenyl)-4-(3-hydroxy-5-methyl-2-oxo-2H-pyran-6-yl)oxazol-2(3H)-one (4m)**

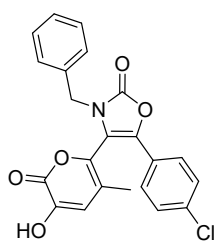

Yellowish powder; yield 85% (0.17 g); mp 91-93 °C. <sup>1</sup>H NMR (300 MHz, DMSO-*d*<sub>6</sub>) δ 7.47 (d, *J* = 8.3 Hz, 2H), 7.38 (d, *J* = 8.6 Hz, 2H), 7.32 – 7.18 (m, 4H), 7.15 (d, *J* = 6.9 Hz, 2H), 6.45 (s, 1H), 4.84 – 4.62 (m, 2H), 1.49 (s, 3H). <sup>13</sup>C {<sup>1</sup>H} NMR (75 MHz, DMSO-*d*<sub>6</sub>) δ 158.6, 153.2, 144.0, 135.9, 135.7, 133.4, 132.9, 129.3, 128.5, 127.8, 127.3, 125.9, 125.4, 120.1, 118.3, 114.8, 45.8, 15.2. HRMS (ESI-TOF) *m/z*: [M+H]<sup>+</sup> Calcd for C<sub>22</sub>H<sub>17</sub>ClNO<sub>5</sub>: 410.0790; Found: 410.0785.



5-(4-Chlorophenyl)-4-(3-hydroxy-5-methyl-2-oxo-2H-pyran-6-yl)-3-phenethylloxazol-2(3H)-one  
(4n)

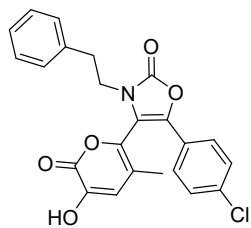

Yellowish powder; yield 88% (0.19 g); mp 118-120 °C.  $^1\text{H}$  NMR (300 MHz, DMSO- $d_6$ )  $\delta$  7.51 – 7.44 (m, 2H), 7.35 (d,  $J$  = 8.7 Hz, 2H), 7.28 – 7.18 (m, 3H), 7.12 (d,  $J$  = 6.5 Hz, 2H), 6.54 (s, 1H), 3.74 (t,  $J$  = 7.3 Hz, 2H), 2.88 (t,  $J$  = 7.3 Hz, 2H), 1.58 (s, 3H).  $^{13}\text{C}$  { $^1\text{H}$ } NMR (126 MHz, DMSO- $d_6$ )  $\delta$  152.8, 137.6, 135.5, 133.2, 129.2, 129.0, 128.7, 128.6, 128.5, 126.6, 125.9, 125.5, 124.0, 120.1, 118.4, 115.5, 43.8, 33.9 15.5. HRMS (ESI-TOF)  $m/z$ :  $[\text{M}+\text{H}]^+$  Calcd for  $\text{C}_{23}\text{H}_{19}\text{ClNO}_5$ : 424.0946; Found: 424.0940.

3-(4-Chlorobenzyl)-5-(4-fluorophenyl)-4-(3-hydroxy-5-methyl-2-oxo-2H-pyran-6-yl)oxazol-2(3H)-one (4o)

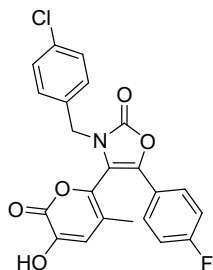

Yellowish powder; yield 82% (0.18 g); mp 173-175 °C.  $^1\text{H}$  NMR (300 MHz, DMSO- $d_6$ )  $\delta$  7.49 – 7.31 (m, 4H), 7.31 – 7.16 (m, 4H), 6.49 (s, 1H), 4.72 (s, 2H), 1.53 (s, 3H).  $^{13}\text{C}$  { $^1\text{H}$ } NMR (126 MHz, DMSO- $d_6$ )  $\delta$  162.1 (d,  $J_{\text{CF}}$  = 247.6 Hz), 158.7, 153.3, 144.1, 136.4, 135.0, 133.0, 132.5, 129.3, 128.5, 126.7 (d,  $J_{\text{CF}}$  = 8.5 Hz), 123.2 (d,  $J_{\text{CF}}$  = 3.3 Hz), 120.1, 118.4, 116.4 (d,  $J_{\text{CF}}$  = 22.1 Hz), 114.3, 45.1, 15.3.  $^{19}\text{F}$  NMR (282 MHz, DMSO- $d_6$ )  $\delta$  -111.27. HRMS (ESI-TOF)  $m/z$ :  $[\text{M}+\text{H}]^+$  Calcd for  $\text{C}_{22}\text{H}_{16}\text{ClFNO}_5$ : 428.0696; Found: 428.0684.

3-Benzyl-5-(4-fluorophenyl)-4-(3-hydroxy-5-methyl-2-oxo-2H-pyran-6-yl)oxazol-2(3H)-one (4p)

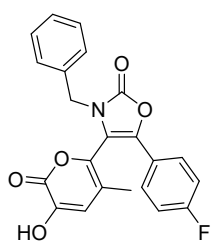

Yellowish powder; yield 79% (0.16 g); mp 93-95 °C.  $^1\text{H}$  NMR (300 MHz, DMSO- $d_6$ )  $\delta$  7.48 – 7.36 (m, 2H), 7.34 – 7.19 (m, 5H), 7.17 – 7.08 (m, 2H), 6.45 (s, 1H), 4.86 – 4.57 (m, 2H), 1.48 (s, 3H).  $^{13}\text{C}$  { $^1\text{H}$ } NMR (126 MHz, DMSO- $d_6$ )  $\delta$  162.1 (d,  $J_{\text{CF}}$  = 247.2 Hz), 158.7, 153.3, 144.0, 136.3, 135.9, 133.2, 128.5, 127.8, 127.3, 126.6 (d,  $J_{\text{CF}}$  = 8.4 Hz), 123.2 (d,  $J_{\text{CF}}$  = 3.3 Hz), 120.0, 118.4, 116.4 (d,  $J_{\text{CF}}$  = 22.1 Hz), 114.3, 45.8, 15.2.  $^{19}\text{F}$  NMR (282 MHz, DMSO)  $\delta$  -111.33. HRMS (ESI-TOF)  $m/z$ :  $[\text{M}+\text{H}]^+$  Calcd for  $\text{C}_{22}\text{H}_{17}\text{FNO}_5$ : 394.1085; Found: 394.1096.

*3-Benzyl-4-(3-methoxy-5-methyl-2-oxo-2H-pyran-6-yl)-5-(p-tolyl)oxazol-2(3H)-one (7)*

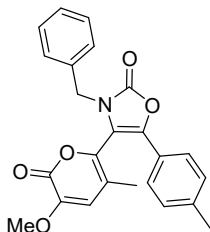

Yellowish powder; yield 94% (0.38 g); mp 105-107 °C. <sup>1</sup>H NMR (300 MHz, DMSO-*d*<sub>6</sub>) δ 7.31 – 7.12 (m, 9H), 6.66 (s, 1H), 4.72 (d, *J* = 27.6 Hz, 2H), 3.77 (s, 3H), 2.29 (s, 3H), 1.53 (s, 3H). <sup>13</sup>C {<sup>1</sup>H} NMR (75 MHz, DMSO-*d*<sub>6</sub>) δ 157.0, 153.3, 145.8, 138.8, 137.3, 135.8, 134.3, 129.7, 128.5, 127.8, 127.3, 124.2, 123.7, 119.0, 116.5, 113.6, 56.3, 45.7, 20.8, 15.4. HRMS (ESI-TOF) *m/z*: [M+H]<sup>+</sup>

Calcd for C<sub>24</sub>H<sub>22</sub>NO<sub>5</sub>: 404.1492; Found: 404.1473.

*2-(2-(4-Methoxyphenyl)-5-(5-(4-methoxyphenyl)-2-oxo-3-phenethyl-2,3-dihydrooxazol-4-yl)-4-methyl-7-oxo-7H-furo[2,3-*c*]pyran-3-yl)acetic acid (10)*

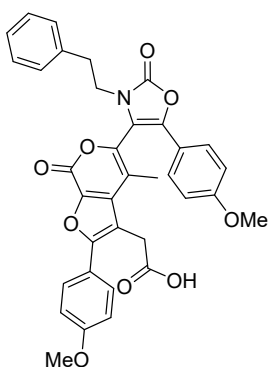

Yellowish powder; yield 68% (0.41 g); mp 249-251 °C. <sup>1</sup>H NMR (300 MHz, DMSO-*d*<sub>6</sub>) δ 12.93 (br.s, 1H), 7.71 (d, *J* = 8.4 Hz, 2H), 7.32 (d, *J* = 8.4 Hz, 2H), 7.22 – 7.09 (m, 7H), 6.95 (d, *J* = 8.4 Hz, 2H), 3.86 (s, 3H), 3.84 – 3.78 (m, 4H), 3.76 (s, 3H), 2.91 (t, *J* = 7.4 Hz, 2H), 1.92 (s, 3H). <sup>13</sup>C {<sup>1</sup>H} NMR (126 MHz, DMSO-*d*<sub>6</sub>) δ 172.0, 160.8, 159.7, 158.6, 153.0, 152.1, 139.4, 137.6, 137.2, 136.6, 136.4, 129.2, 128.6, 128.4, 126.5, 126.1, 120.4, 118.9, 115.5, 114.9, 114.7, 112.8, 111.7, 55.4, 55.2, 43.7, 33.9, 30.4, 12.8. HRMS (ESI-TOF) *m/z*: [M+H]<sup>+</sup> Calcd for C<sub>35</sub>H<sub>30</sub>NO<sub>9</sub>: 608.1915; Found: 608.1895.

#### 4. Copies of $^1\text{H}$ and $^{13}\text{C}$ NMR spectra for all compounds

$^1\text{H}$  NMR spectrum (300 MHz) of **4a** in  $\text{DMSO-}d_6$

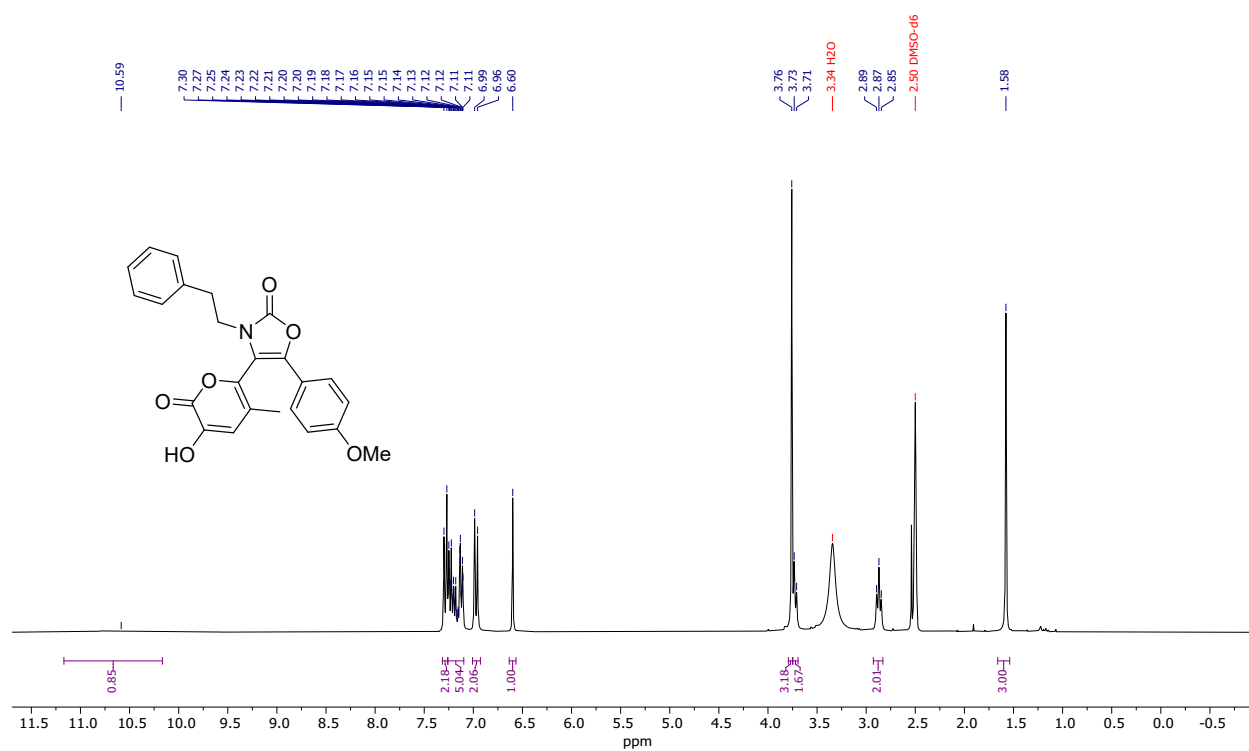

$^{13}\text{C}$   $\{^1\text{H}\}$  NMR spectrum (151 MHz) of **4a** in  $\text{DMSO-}d_6$

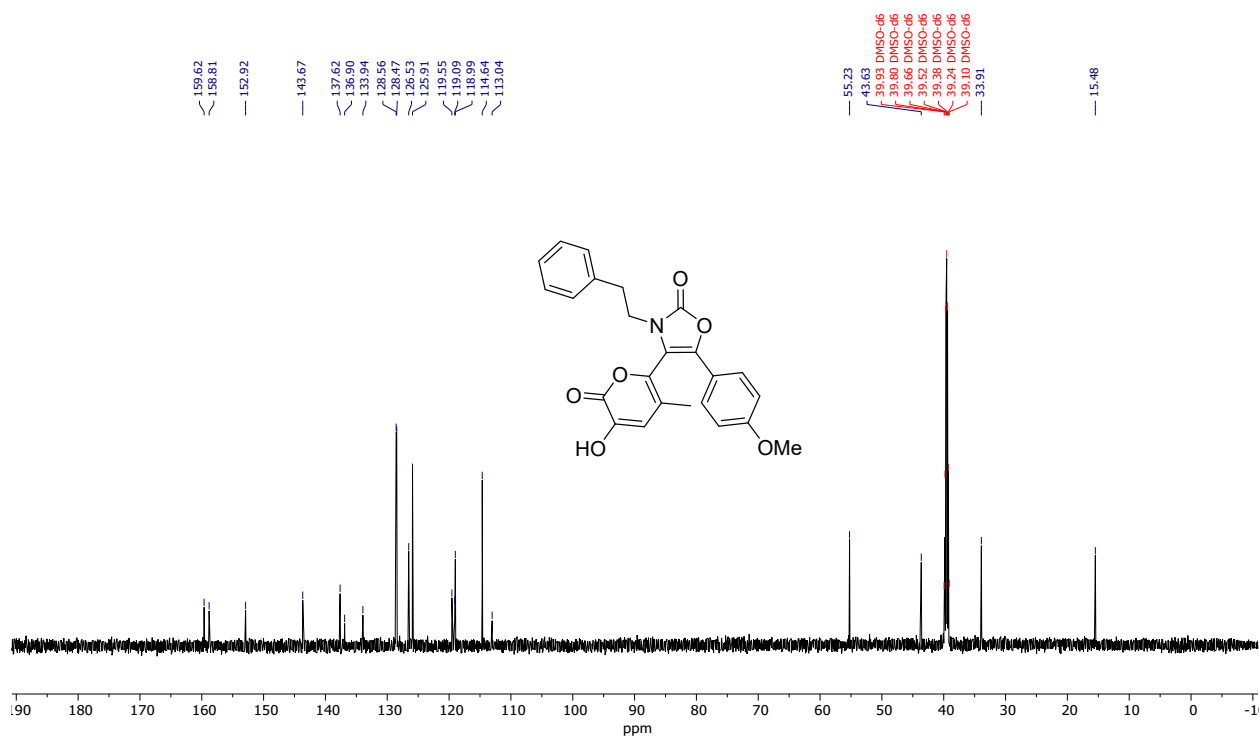

$^1\text{H}$  NMR spectrum (300 MHz) of **4b** in  $\text{DMSO-}d_6$

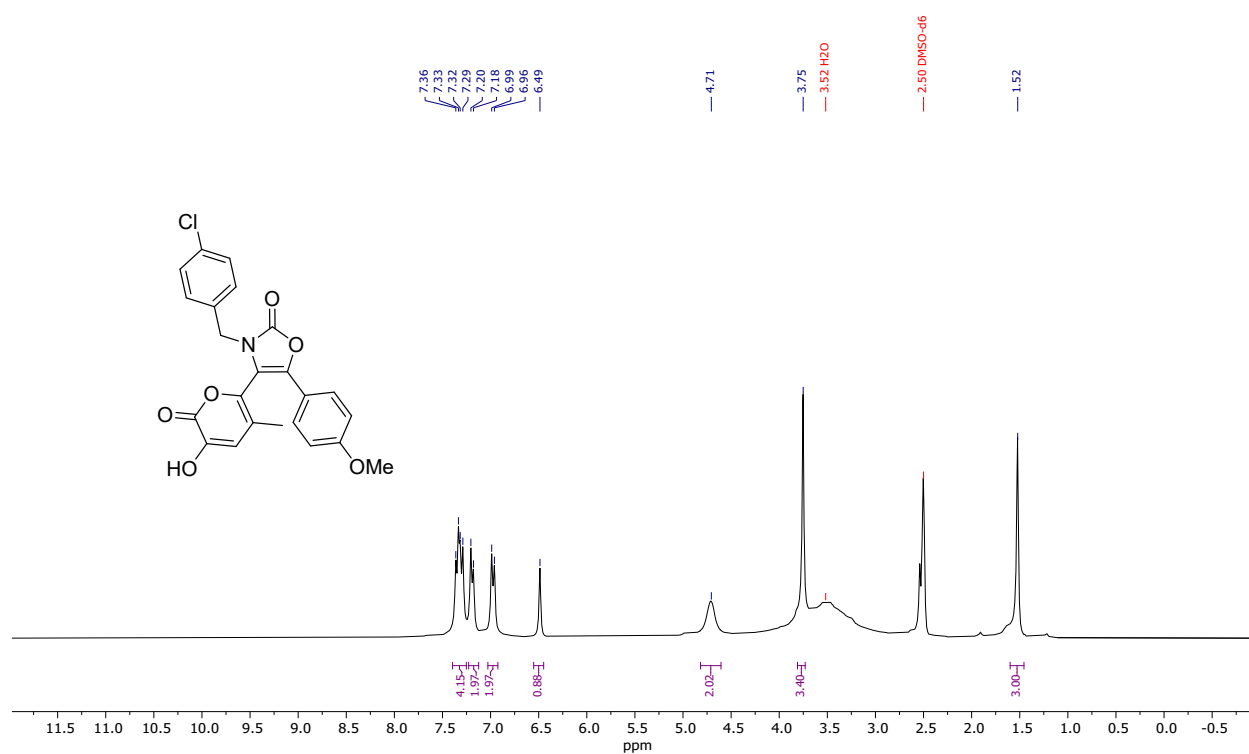

$^{13}\text{C}$   $\{^1\text{H}\}$  NMR spectrum (151 MHz) of **4b** in  $\text{DMSO-}d_6$

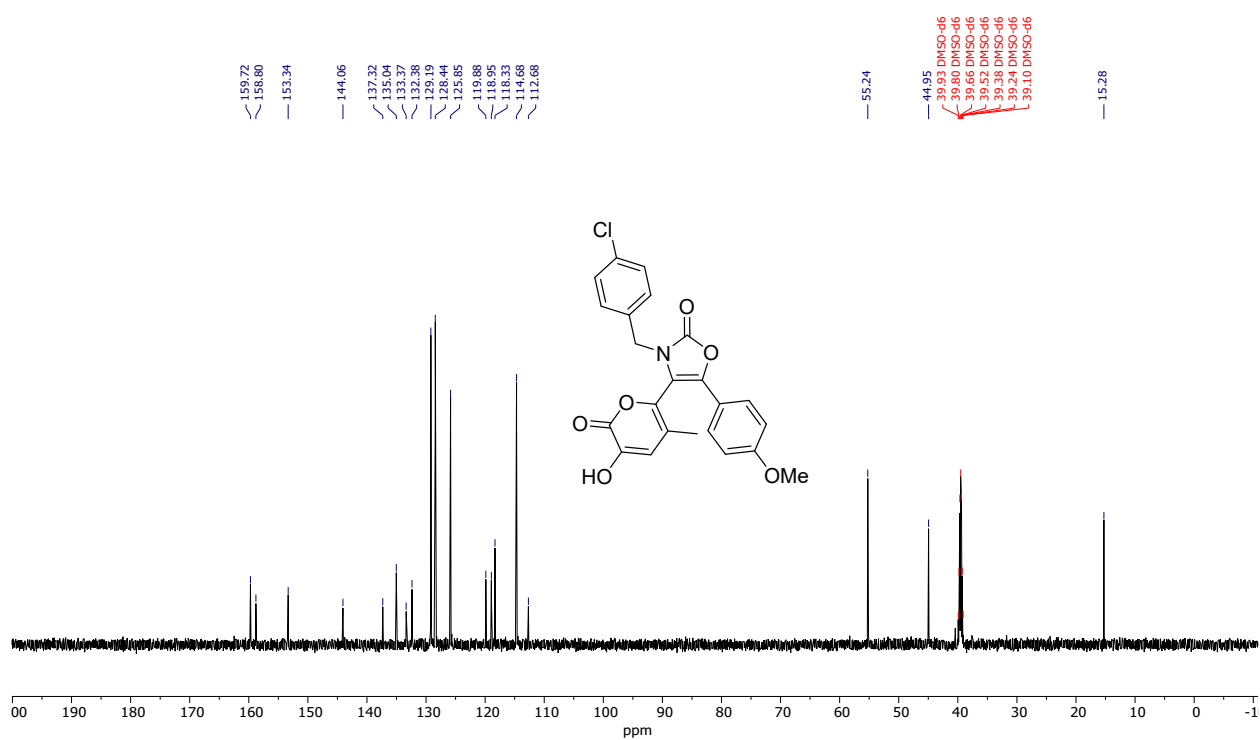

$^1\text{H}$  NMR spectrum (300 MHz) of **4c** in  $\text{DMSO-}d_6$

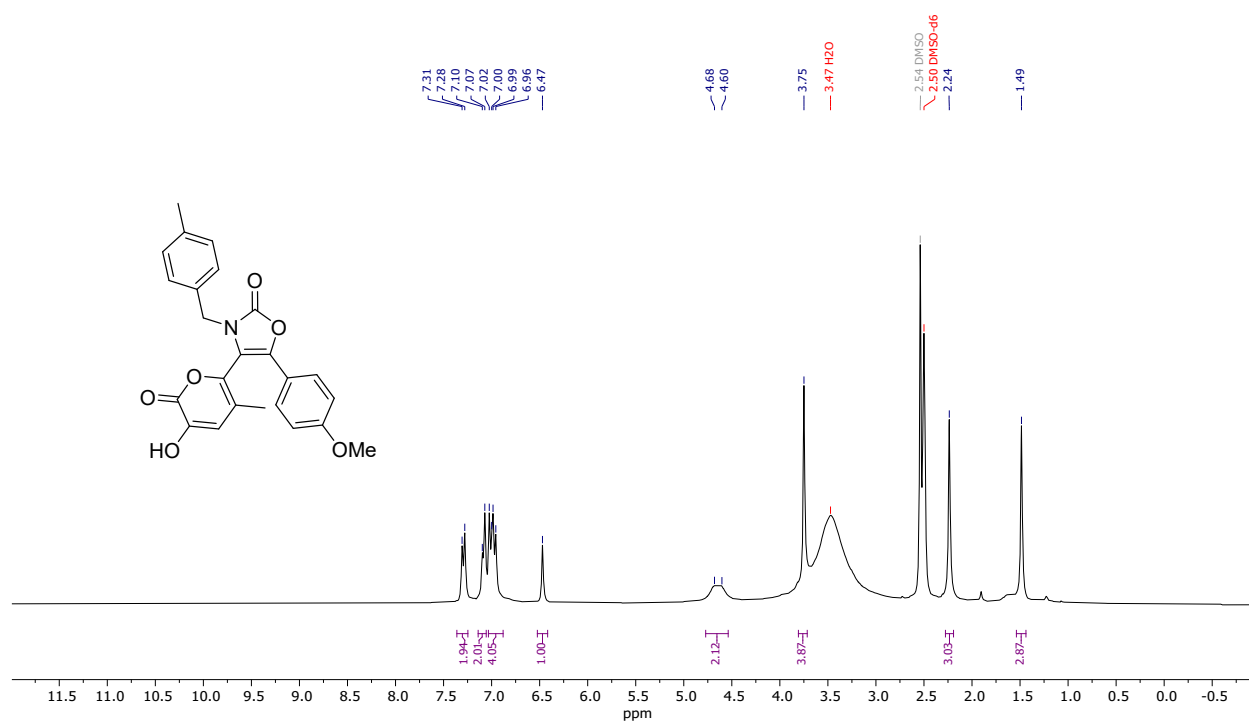

$^{13}\text{C}$   $\{^1\text{H}\}$  NMR spectrum (75 MHz) of **4c** in  $\text{DMSO-}d_6$

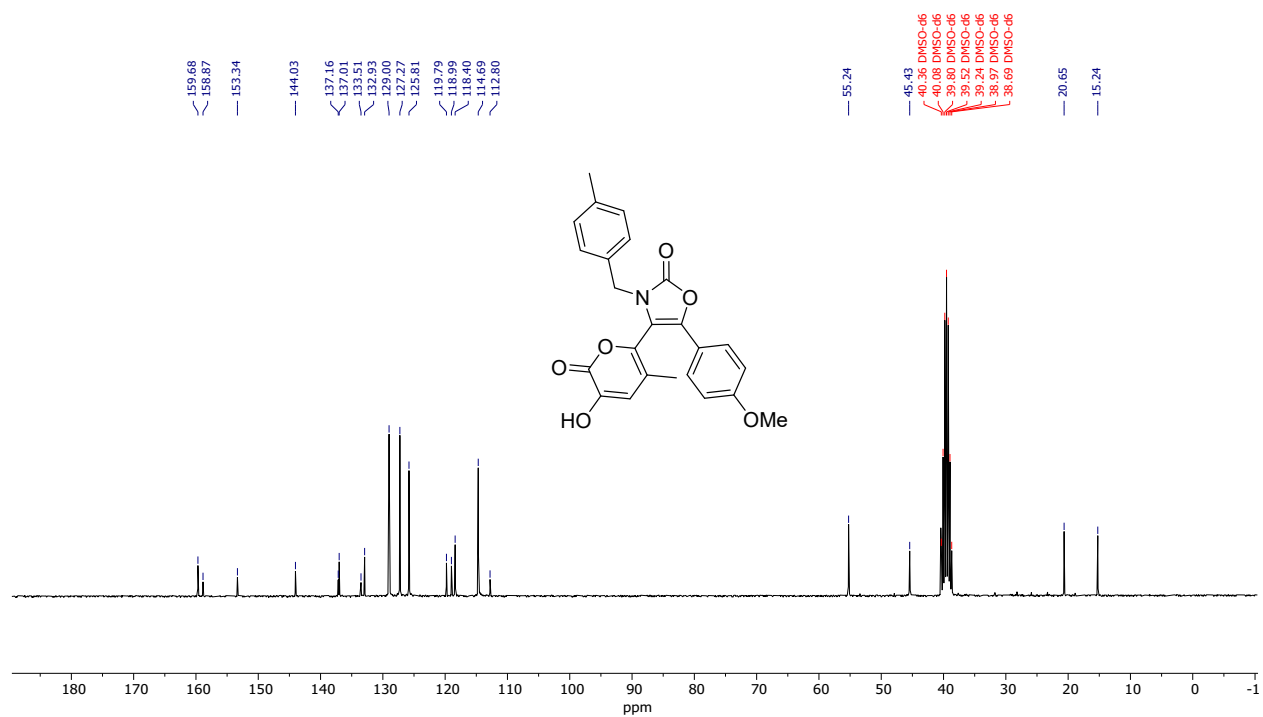

$^1\text{H}$  NMR spectrum (300 MHz) of **4d** in  $\text{DMSO-}d_6$

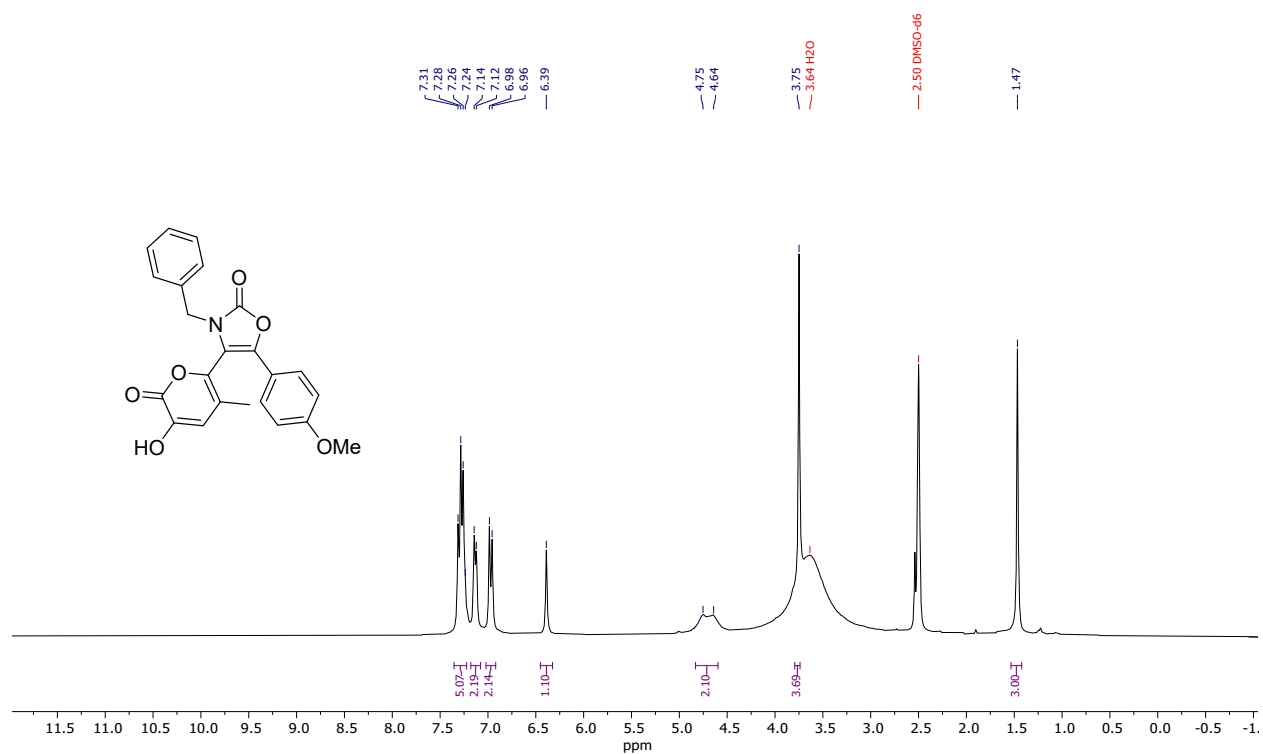

$^{13}\text{C}$   $\{^1\text{H}\}$  NMR spectrum (151 MHz) of **4d** in  $\text{DMSO-}d_6$

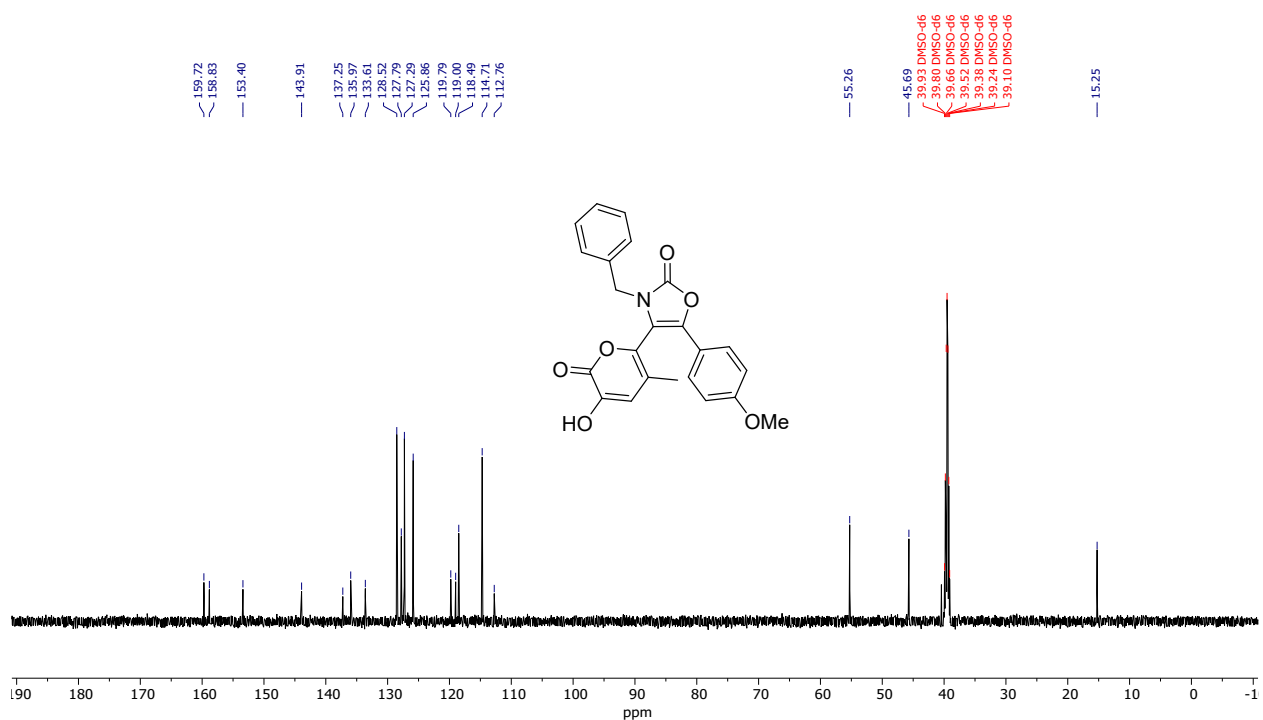

$^1\text{H}$  NMR spectrum (300 MHz) of **4e** in  $\text{DMSO-}d_6$

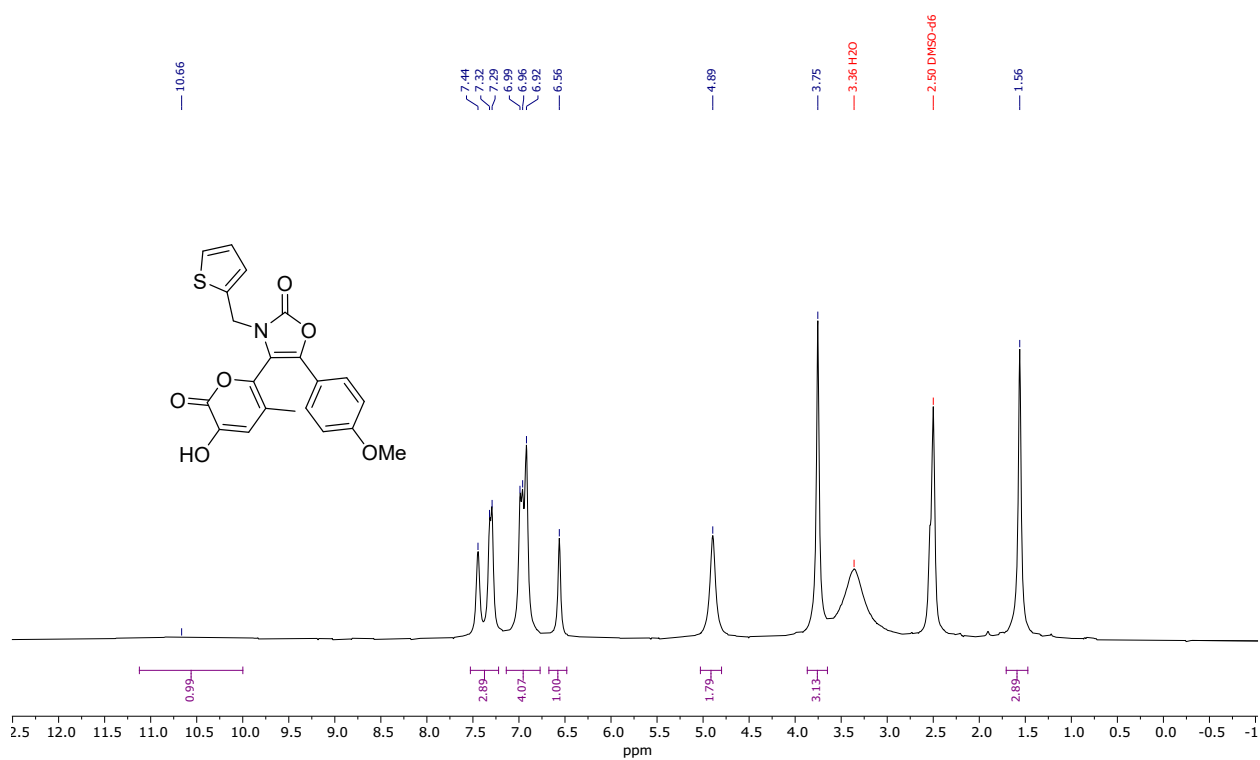

$^{13}\text{C}$   $\{^1\text{H}\}$  NMR spectrum (75 MHz) of **4e** in  $\text{DMSO-}d_6$

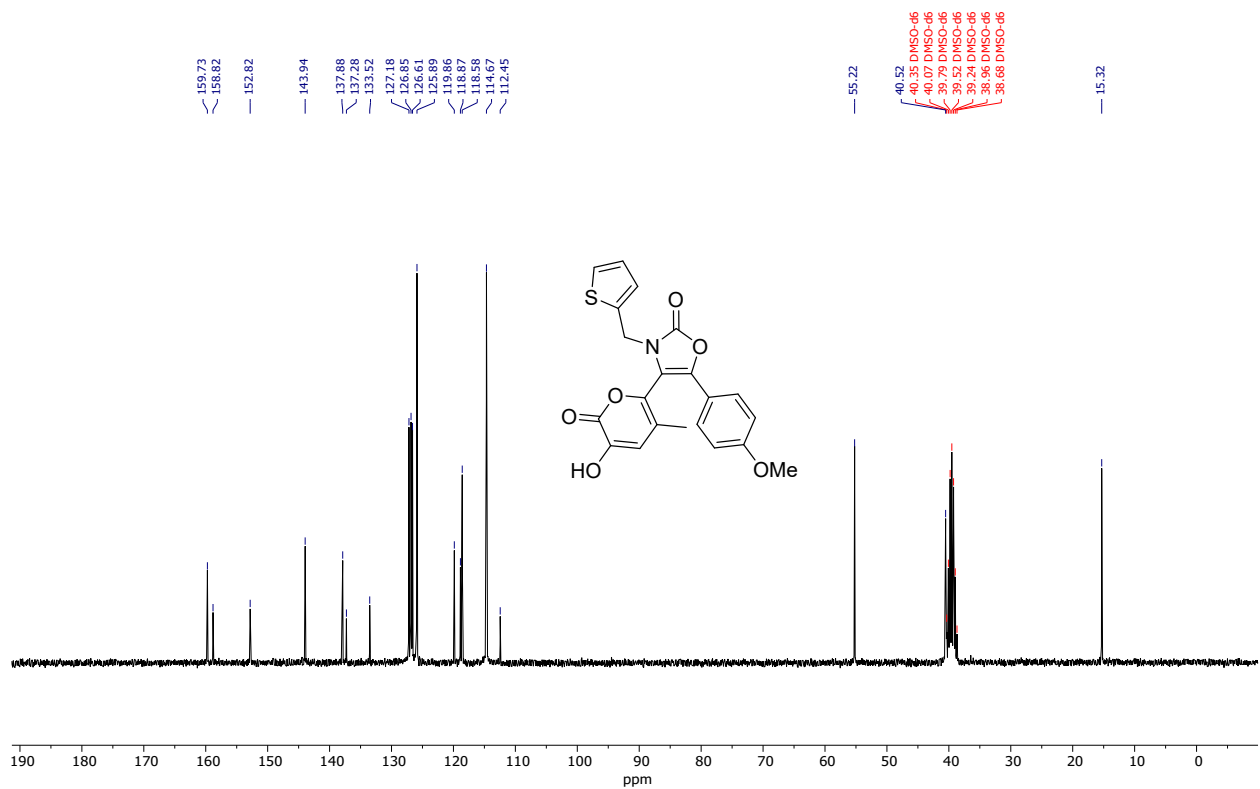

$^1\text{H}$  NMR spectrum (300 MHz) of **4f** in  $\text{DMSO-}d_6$

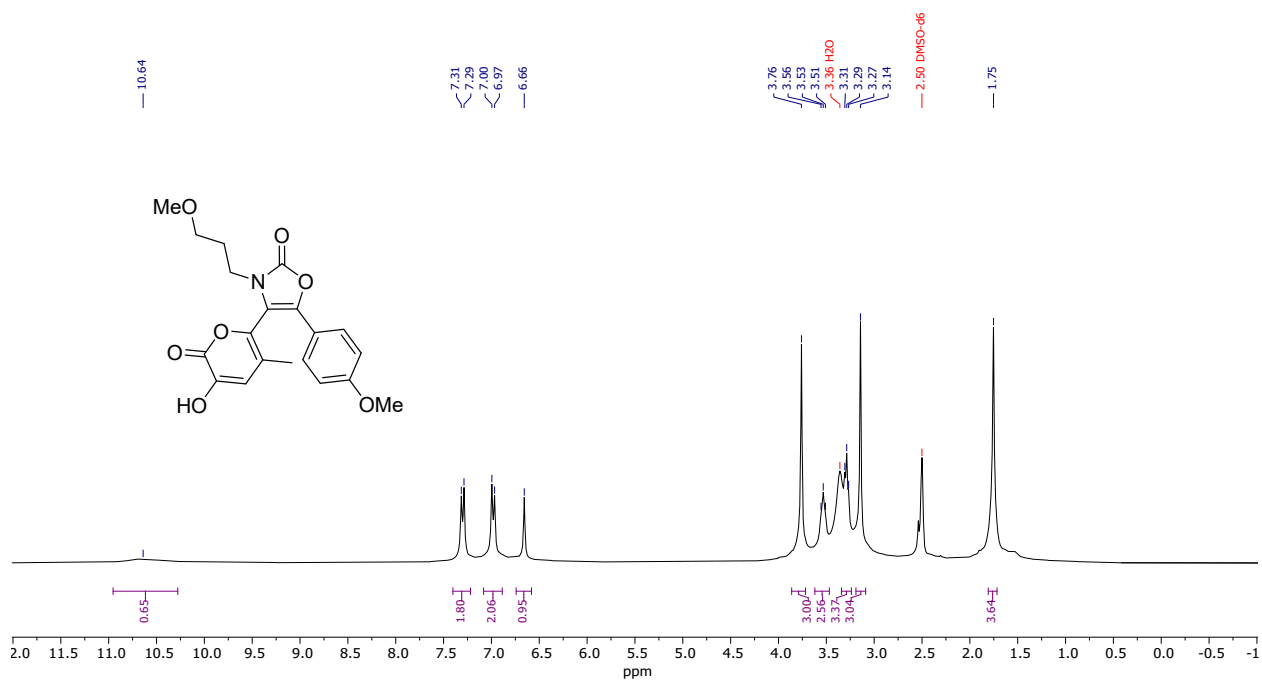

$^{13}\text{C}$   $\{^1\text{H}\}$  NMR spectrum (126 MHz) of **4f** in  $\text{DMSO-}d_6$

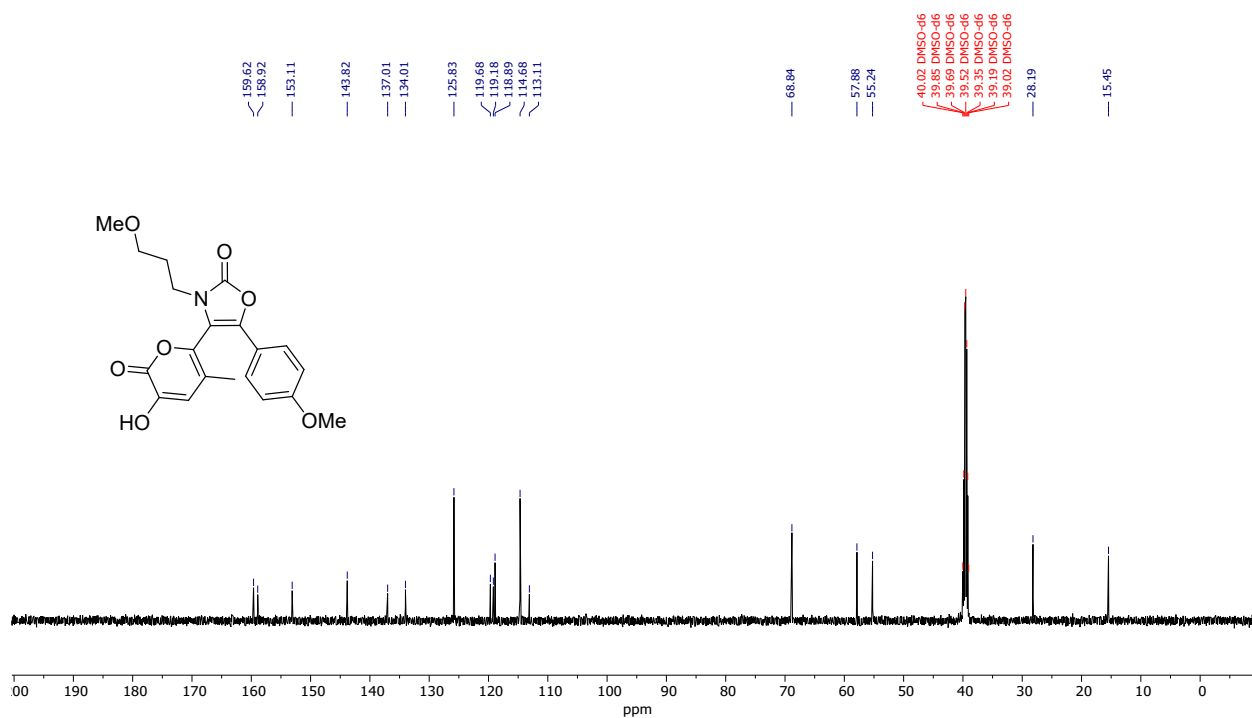



$^1\text{H}$  NMR spectrum (300 MHz) of **4g** in  $\text{DMSO-}d_6$

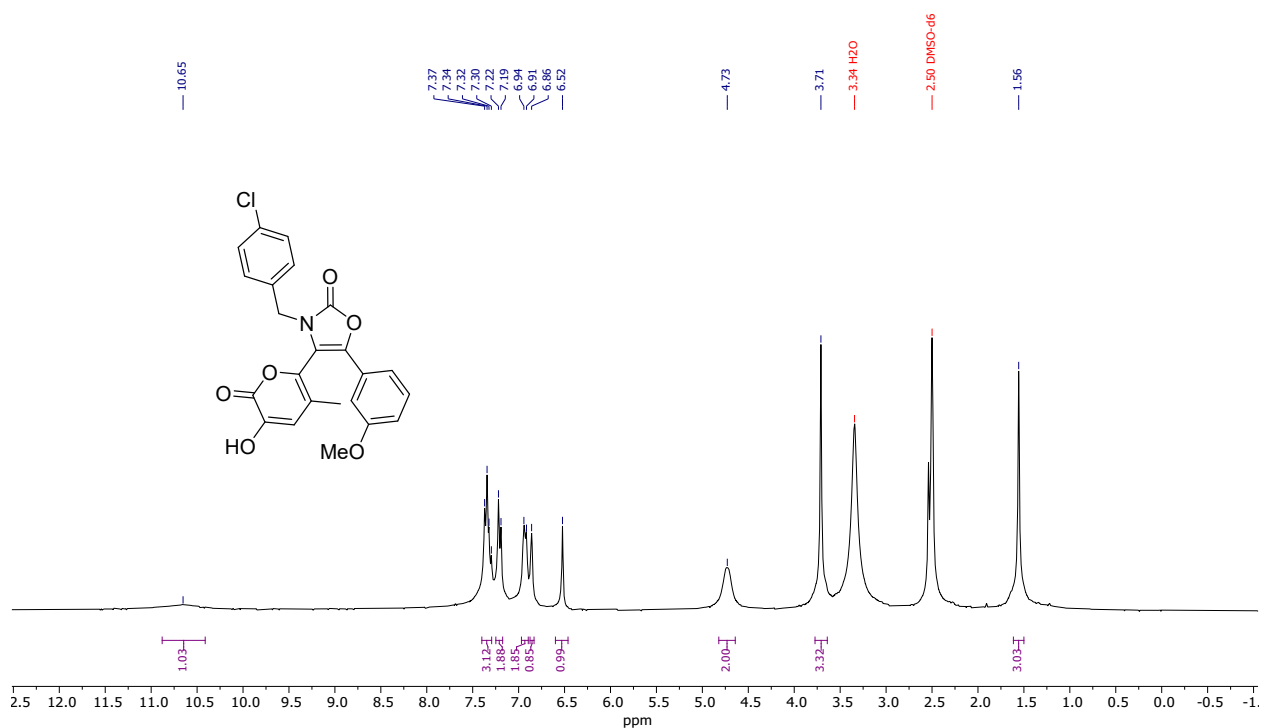

$^{13}\text{C}$   $\{^1\text{H}\}$  NMR spectrum (75 MHz) of **4g** in  $\text{DMSO-}d_6$

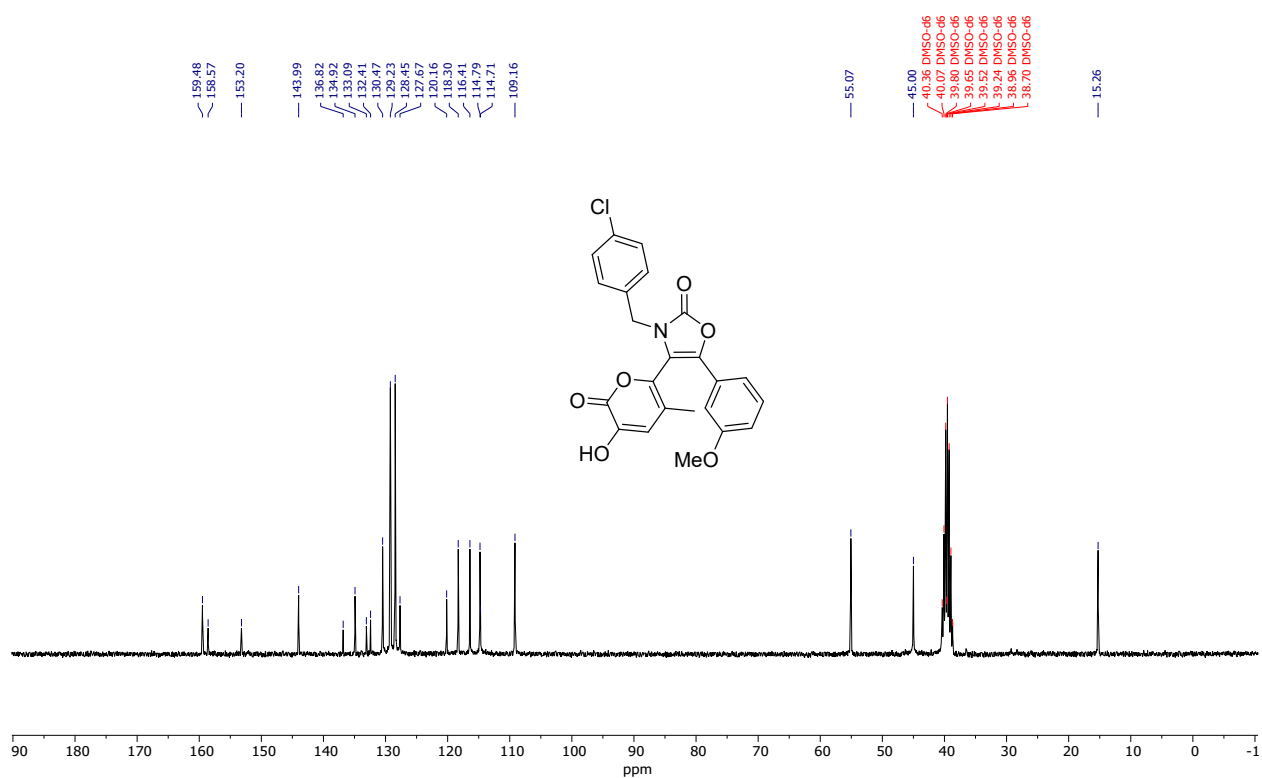

$^1\text{H}$  NMR spectrum (300 MHz) of **4h** in  $\text{DMSO-}d_6$

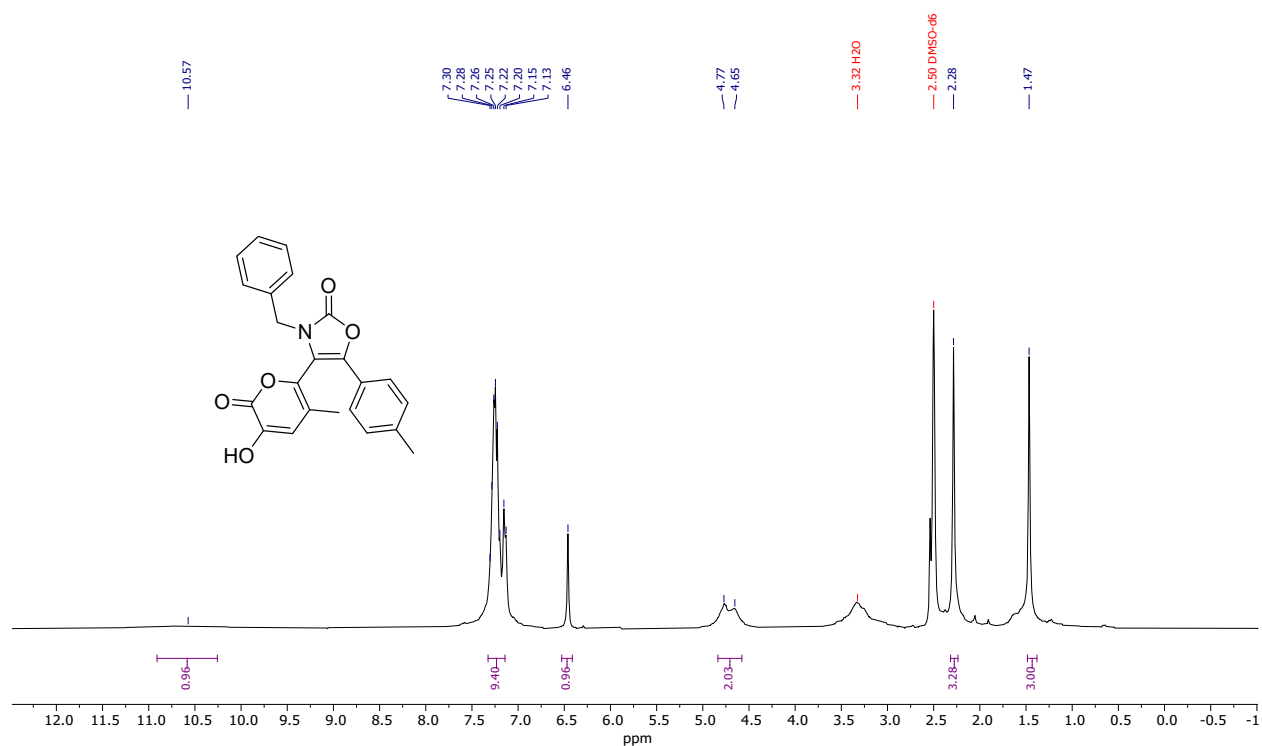

$^{13}\text{C}$   $\{^1\text{H}\}$  NMR spectrum (75 MHz) of **4h** in  $\text{DMSO-}d_6$

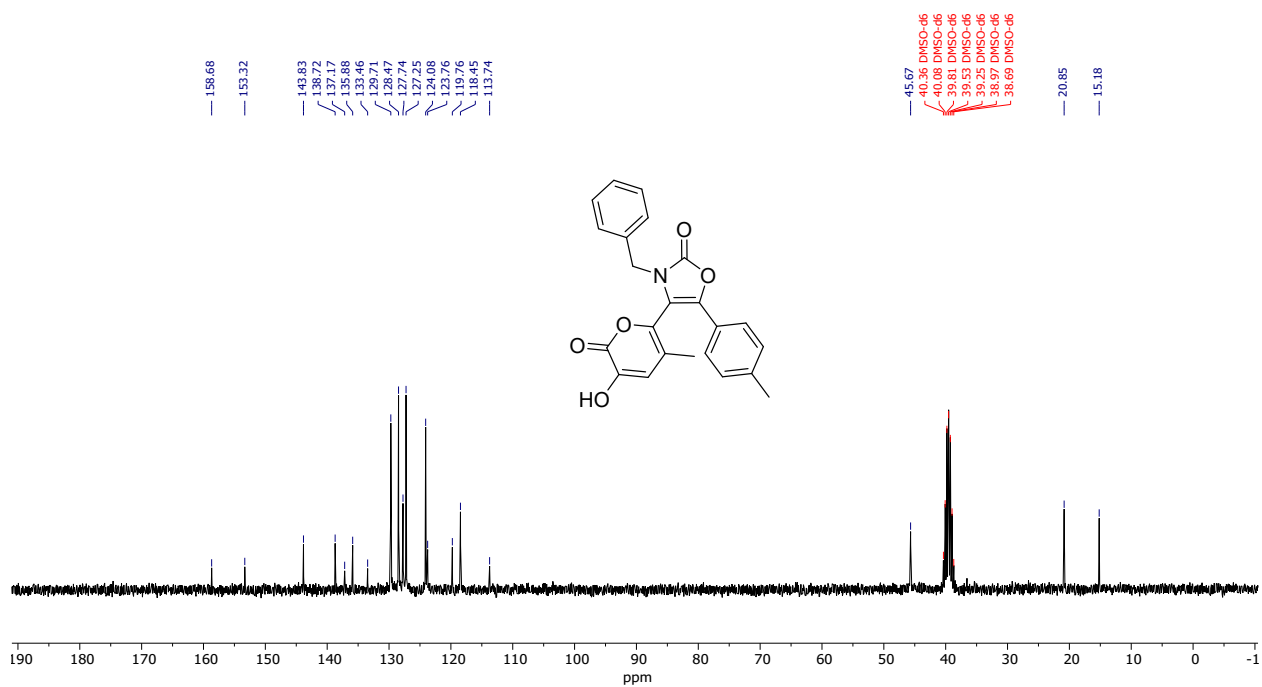

$^1\text{H}$  NMR spectrum (300 MHz) of **4i** in  $\text{DMSO-}d_6$

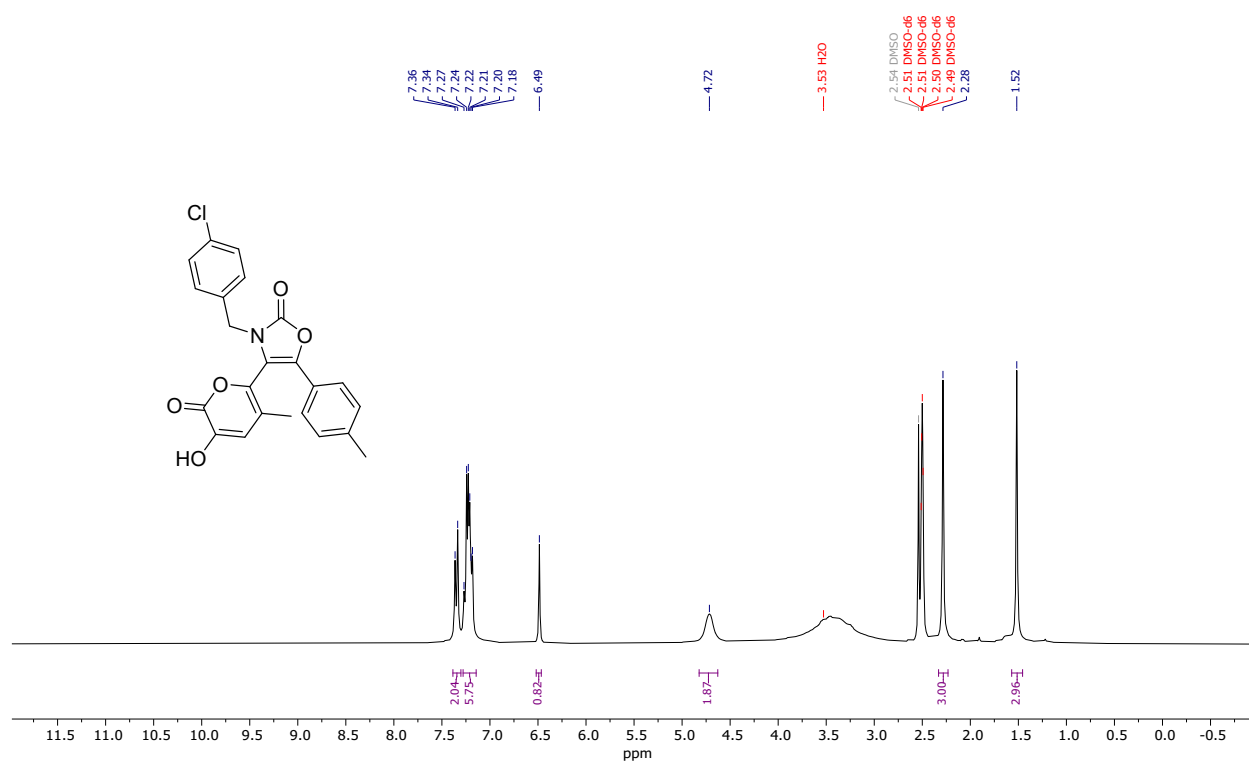

$^{13}\text{C}$   $\{^1\text{H}\}$  NMR spectrum (126 MHz) of **4i** in  $\text{DMSO-}d_6$

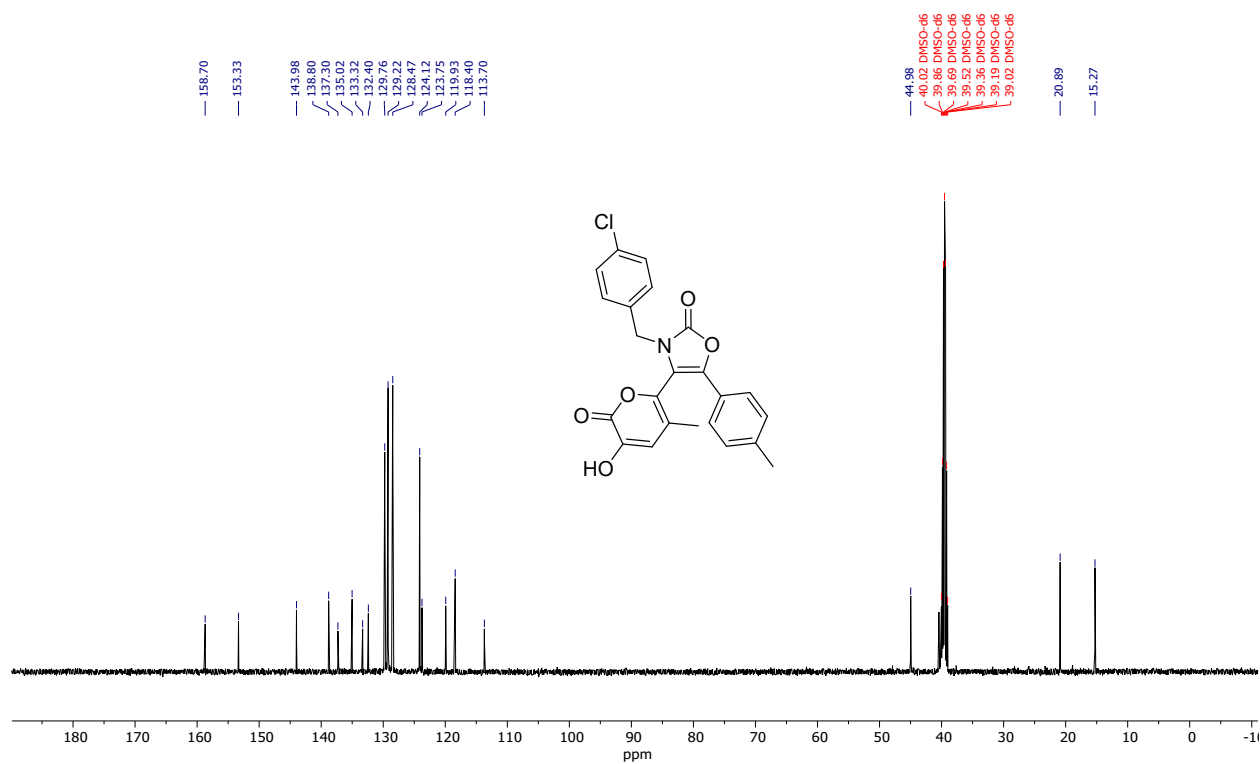

$^1\text{H}$  NMR spectrum (300 MHz) of **4j** in  $\text{DMSO-}d_6$

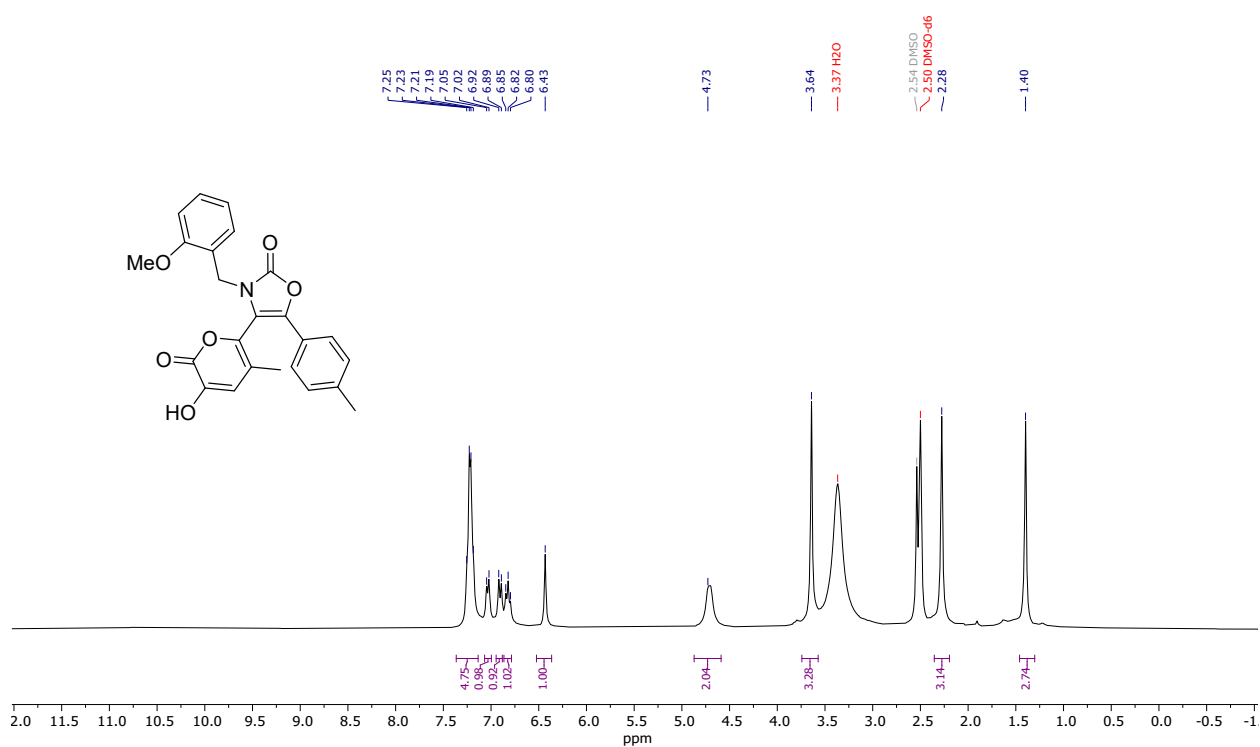

$^{13}\text{C}$   $\{^1\text{H}\}$  NMR spectrum (126 MHz) of **4j** in  $\text{DMSO-}d_6$

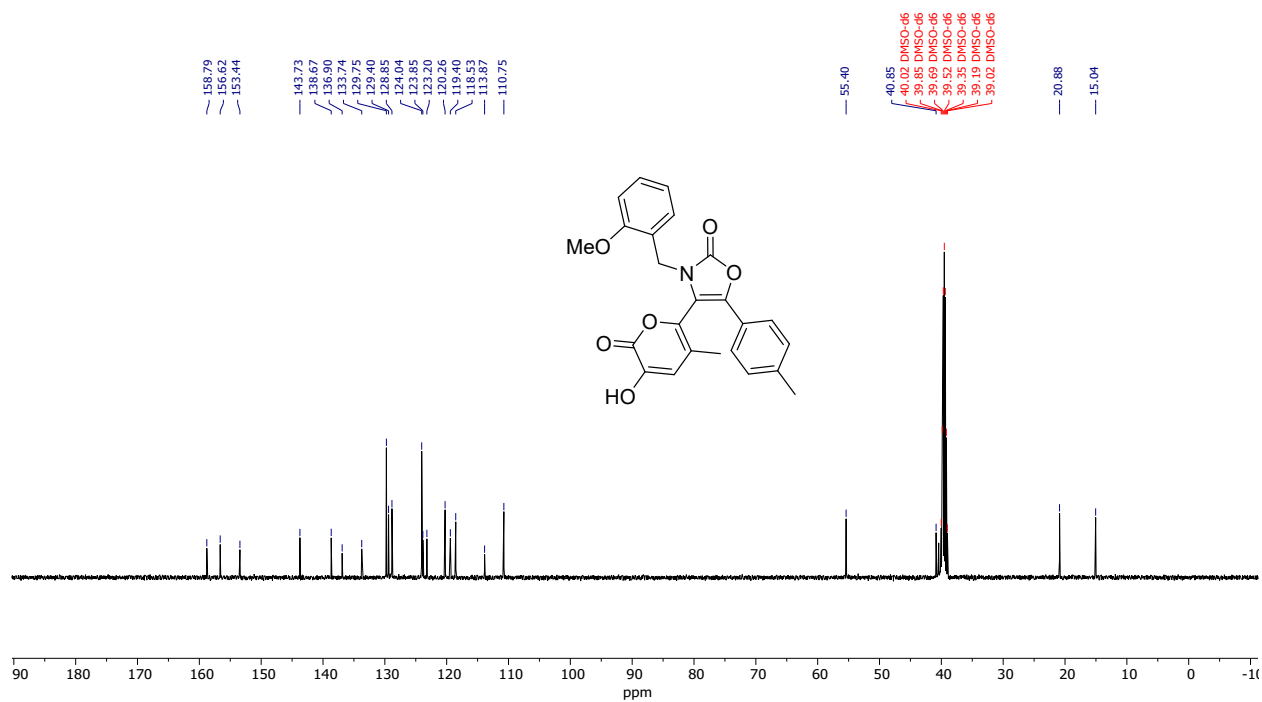

$^1\text{H}$  NMR spectrum (300 MHz) of **4k** in  $\text{DMSO-}d_6$

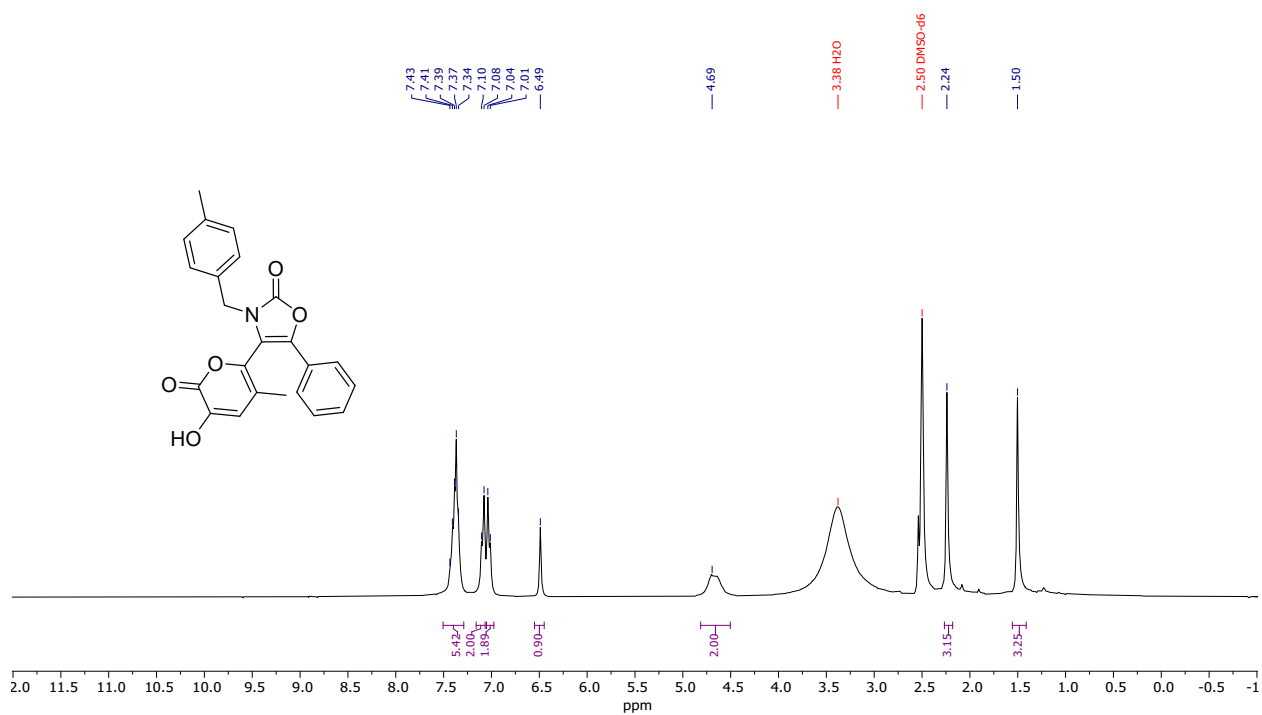

$^{13}\text{C}$   $\{^1\text{H}\}$  NMR spectrum (75 MHz) of **4k** in  $\text{DMSO-}d_6$

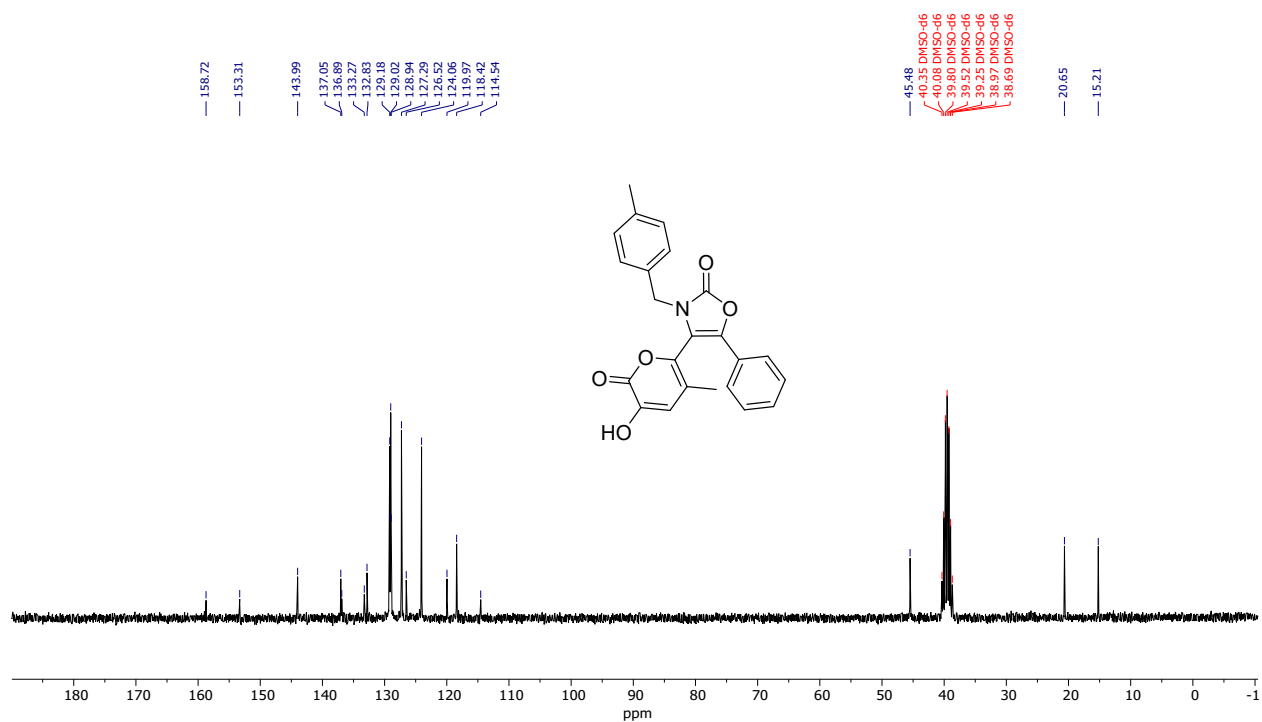

$^1\text{H}$  NMR spectrum (300 MHz) of **4I** in  $\text{DMSO-}d_6$

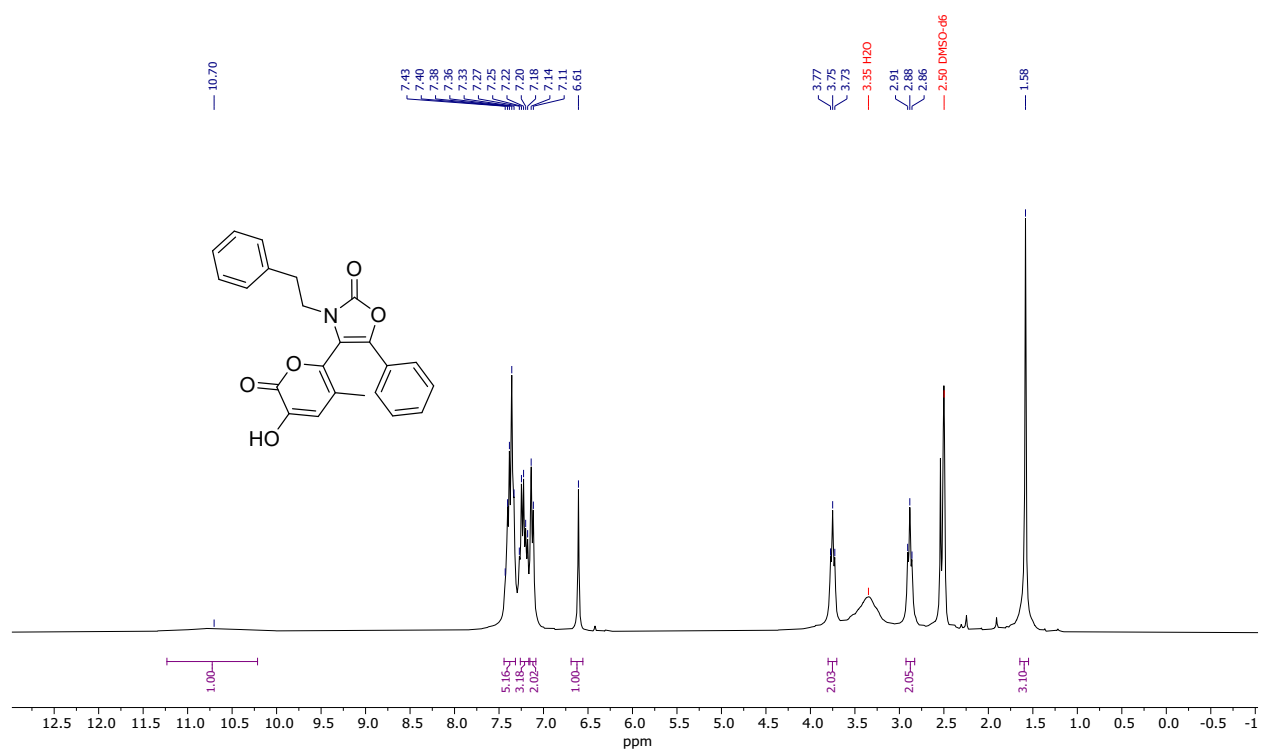

$^{13}\text{C}$   $\{^1\text{H}\}$  NMR spectrum (75 MHz) of **4I** in  $\text{DMSO-}d_6$

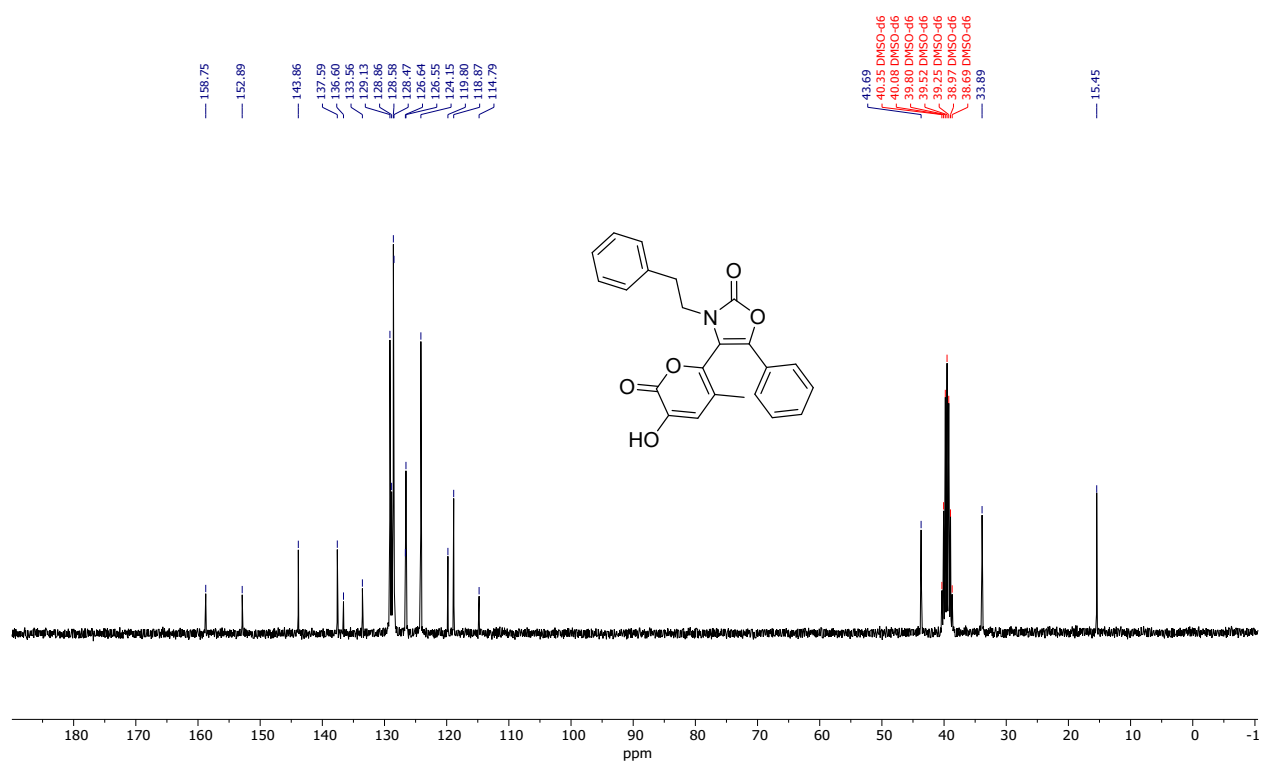

$^1\text{H}$  NMR spectrum (300 MHz) of **4m** in  $\text{DMSO-}d_6$

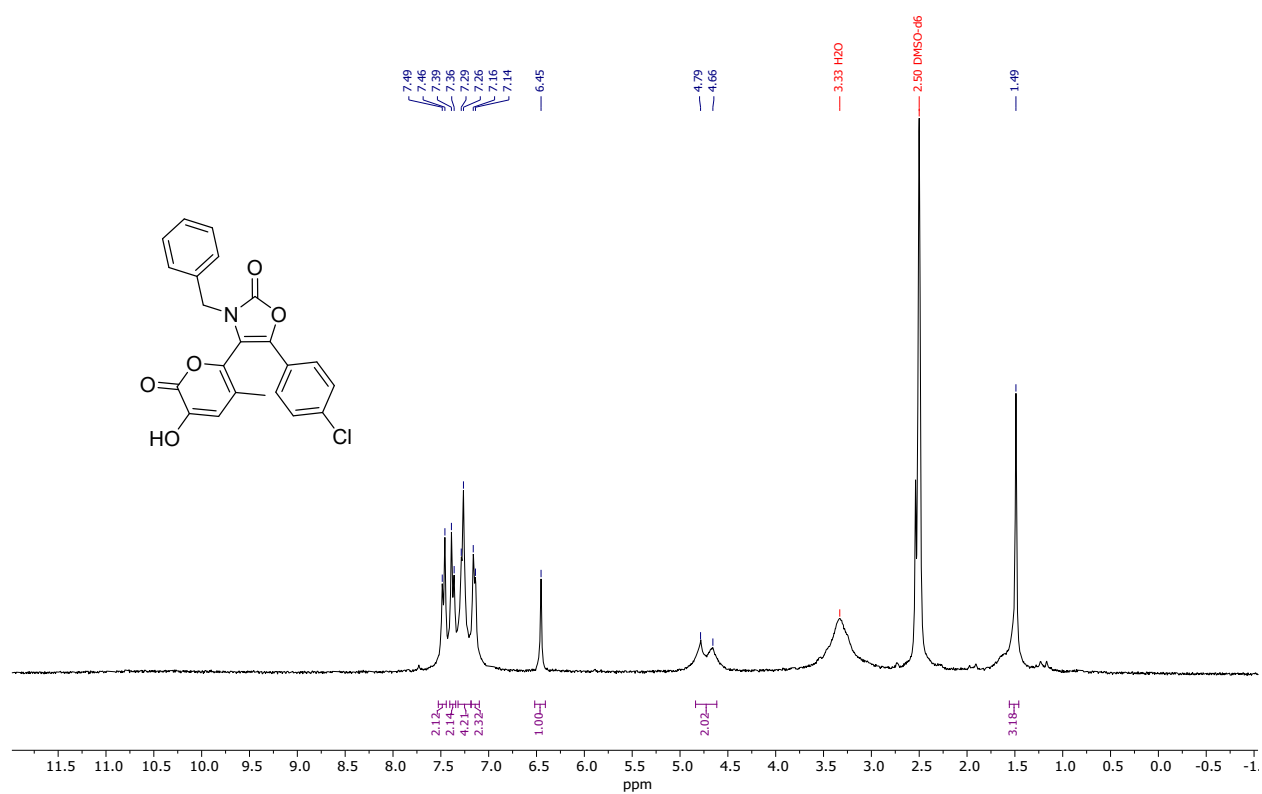

$^{13}\text{C}$  { $^1\text{H}$ } NMR spectrum (75 MHz) of **4m** in  $\text{DMSO-}d_6$

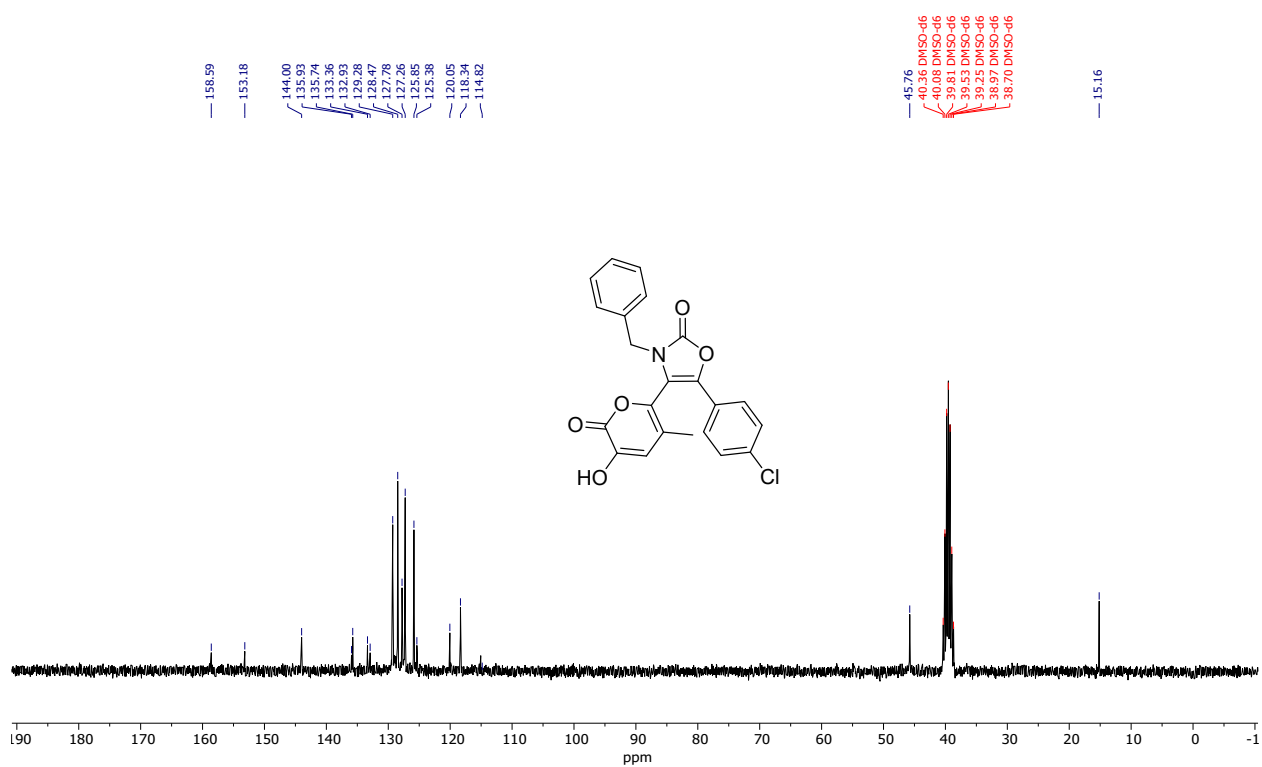

$^1\text{H}$  NMR spectrum (300 MHz) of **4n** in  $\text{DMSO-}d_6$

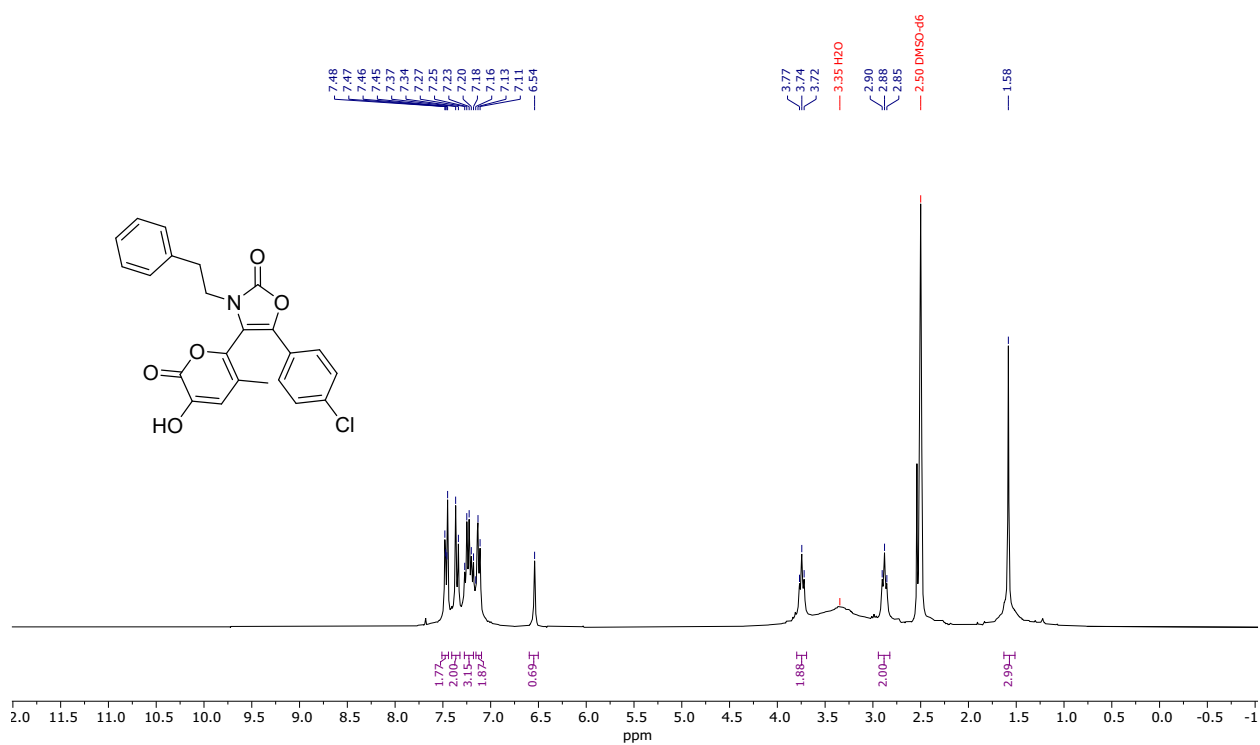

$^{13}\text{C}$   $\{^1\text{H}\}$  NMR spectrum (126 MHz) of **4n** in  $\text{DMSO-}d_6$

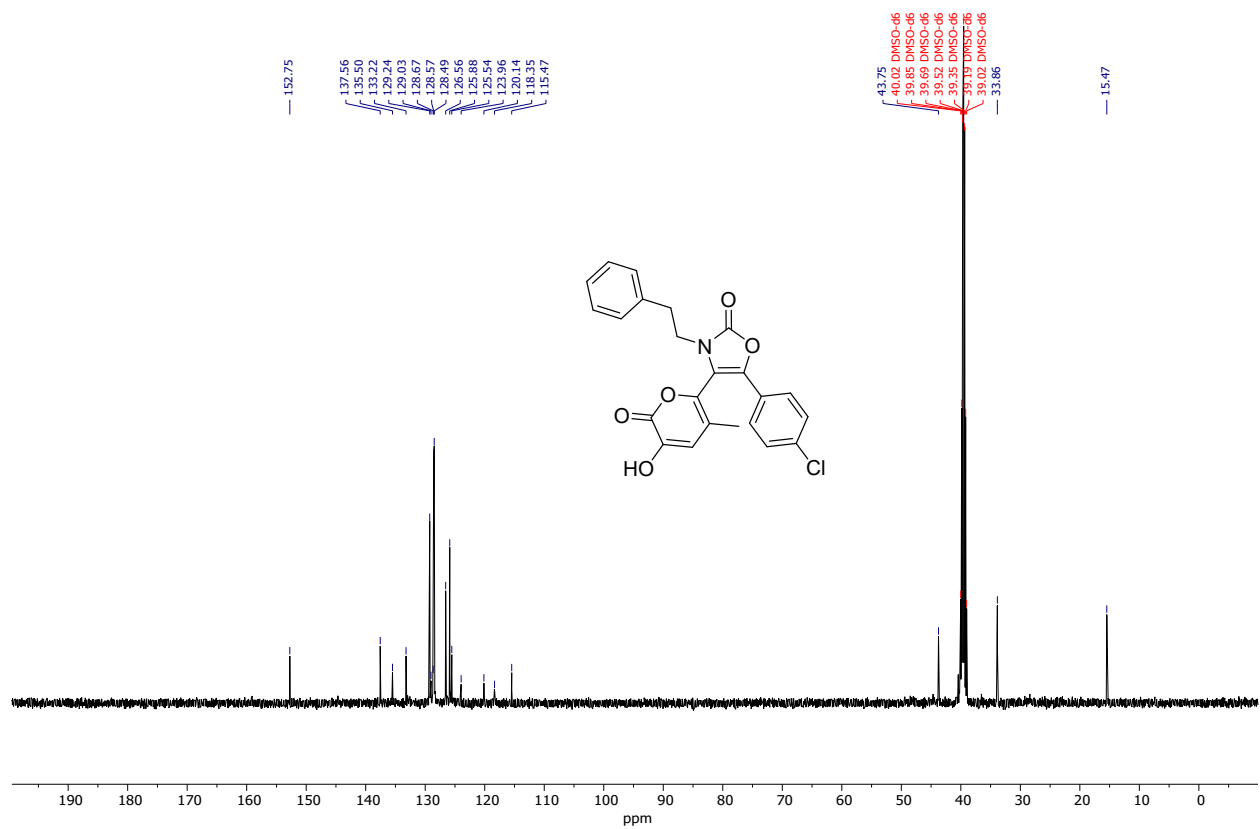



$^1\text{H}$  NMR spectrum (300 MHz) of **4o** in  $\text{DMSO-}d_6$

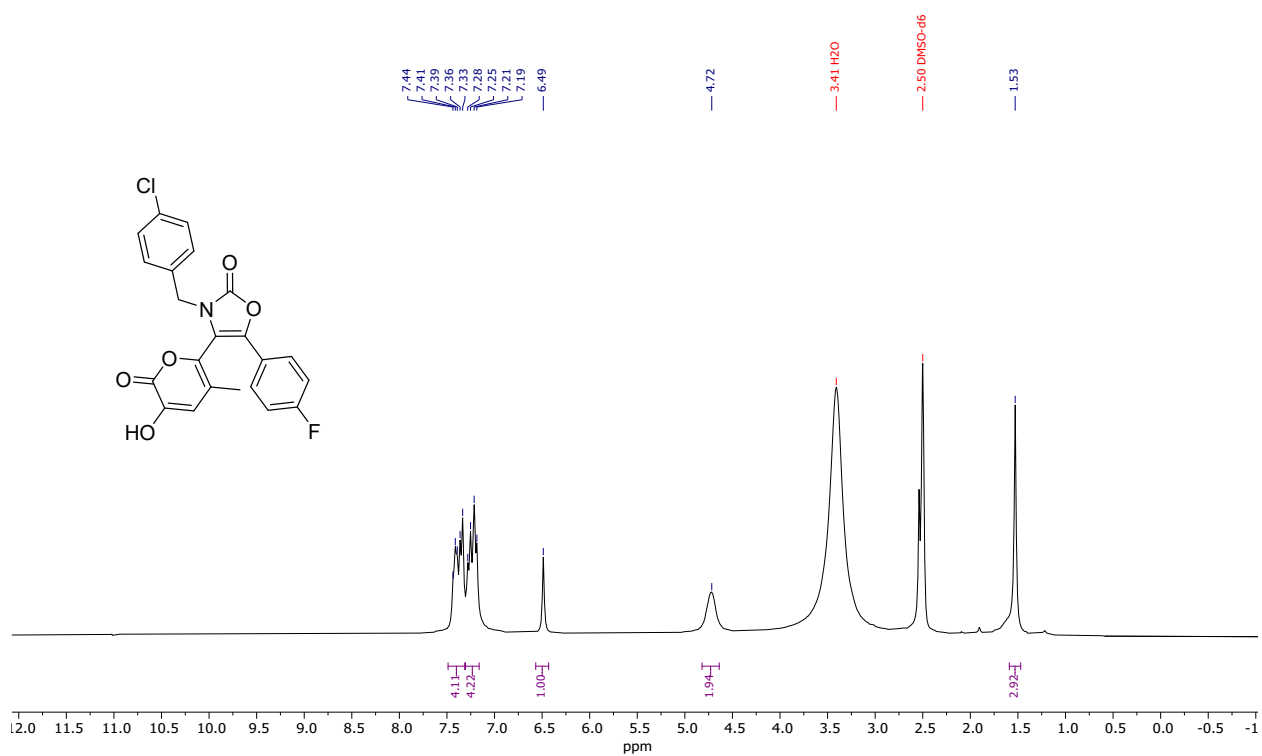

$^{13}\text{C}$   $\{^1\text{H}\}$  NMR spectrum (126 MHz) of **4o** in  $\text{DMSO-}d_6$

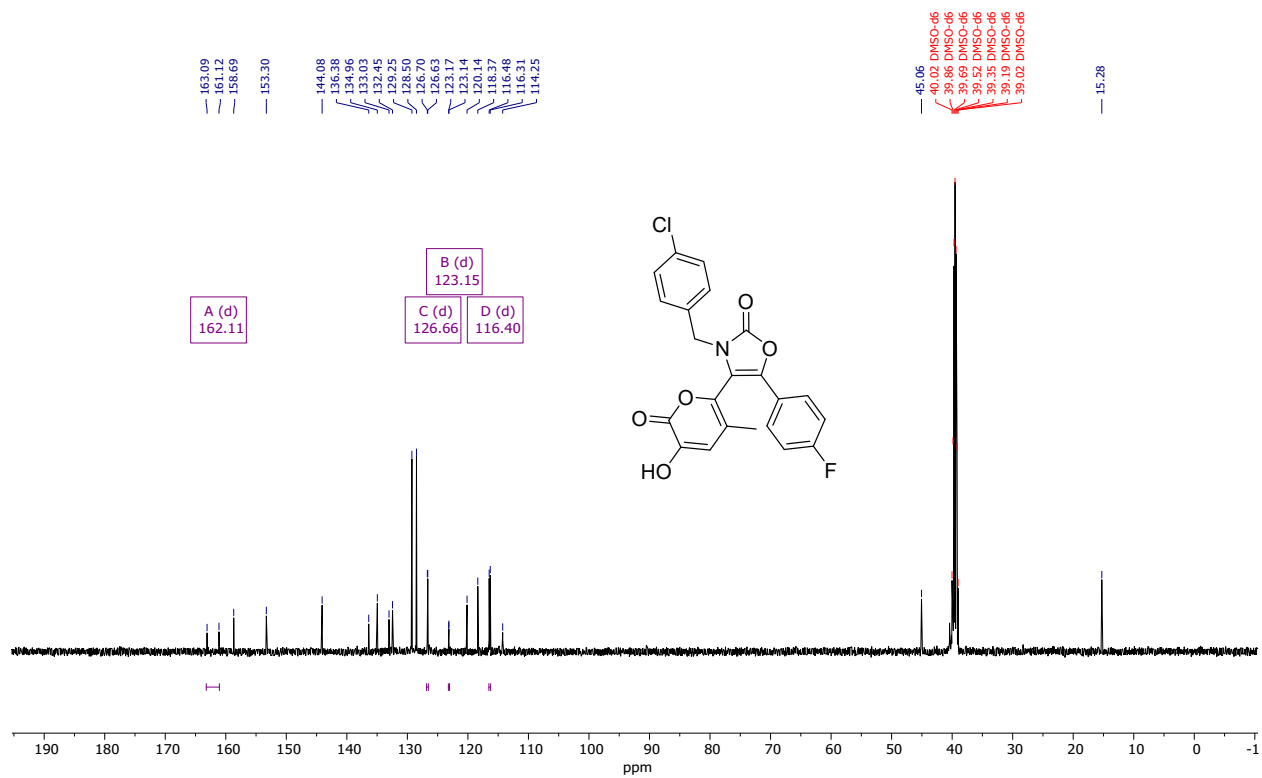

$^{19}\text{F}$  NMR spectrum (282 MHz) of **4o** in  $\text{DMSO-}d_6$

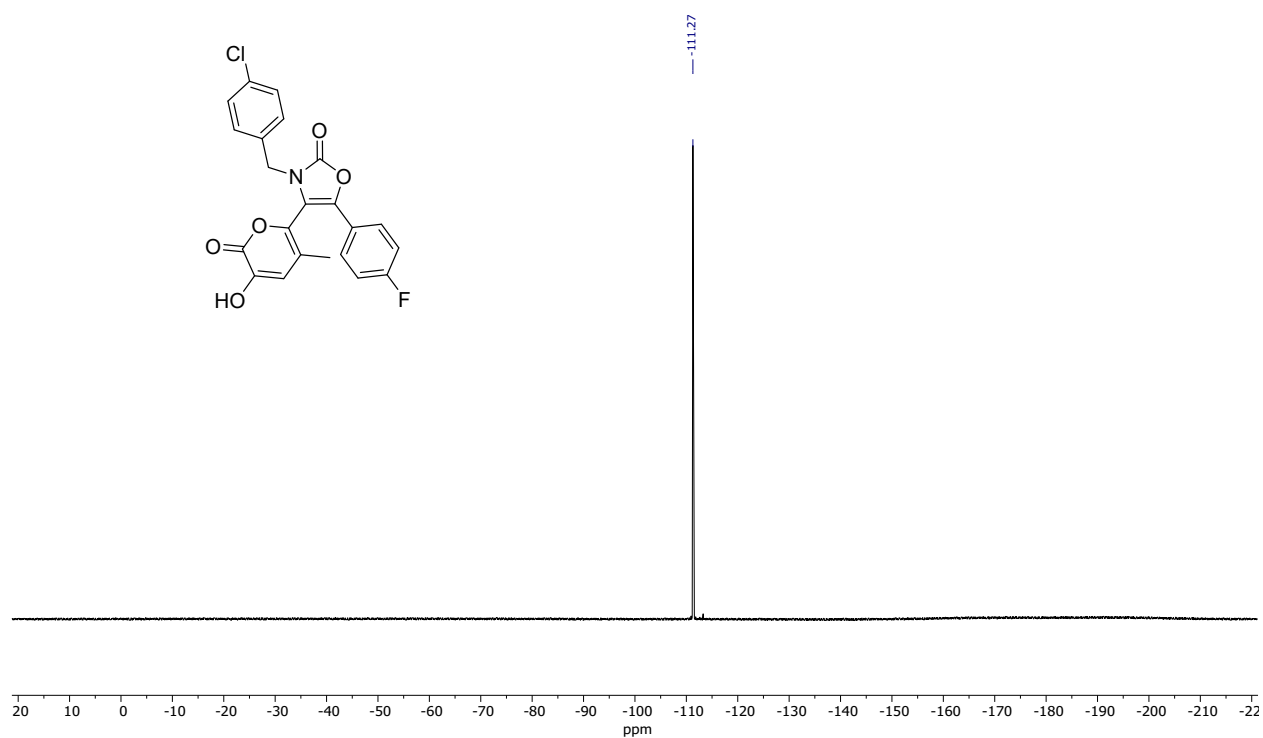

$^1\text{H}$  NMR spectrum (300 MHz) of **4p** in  $\text{DMSO-}d_6$

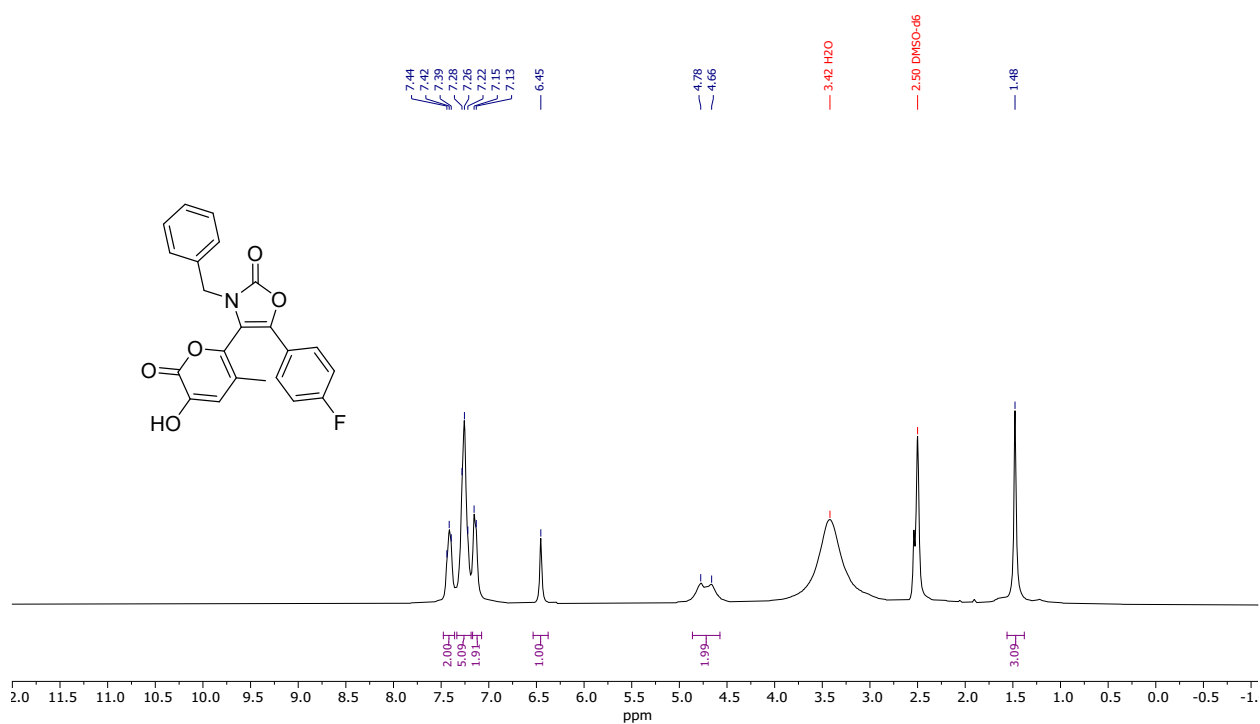

$^{13}\text{C}$   $\{^1\text{H}\}$  NMR spectrum (126 MHz) of **4p** in  $\text{DMSO-}d_6$

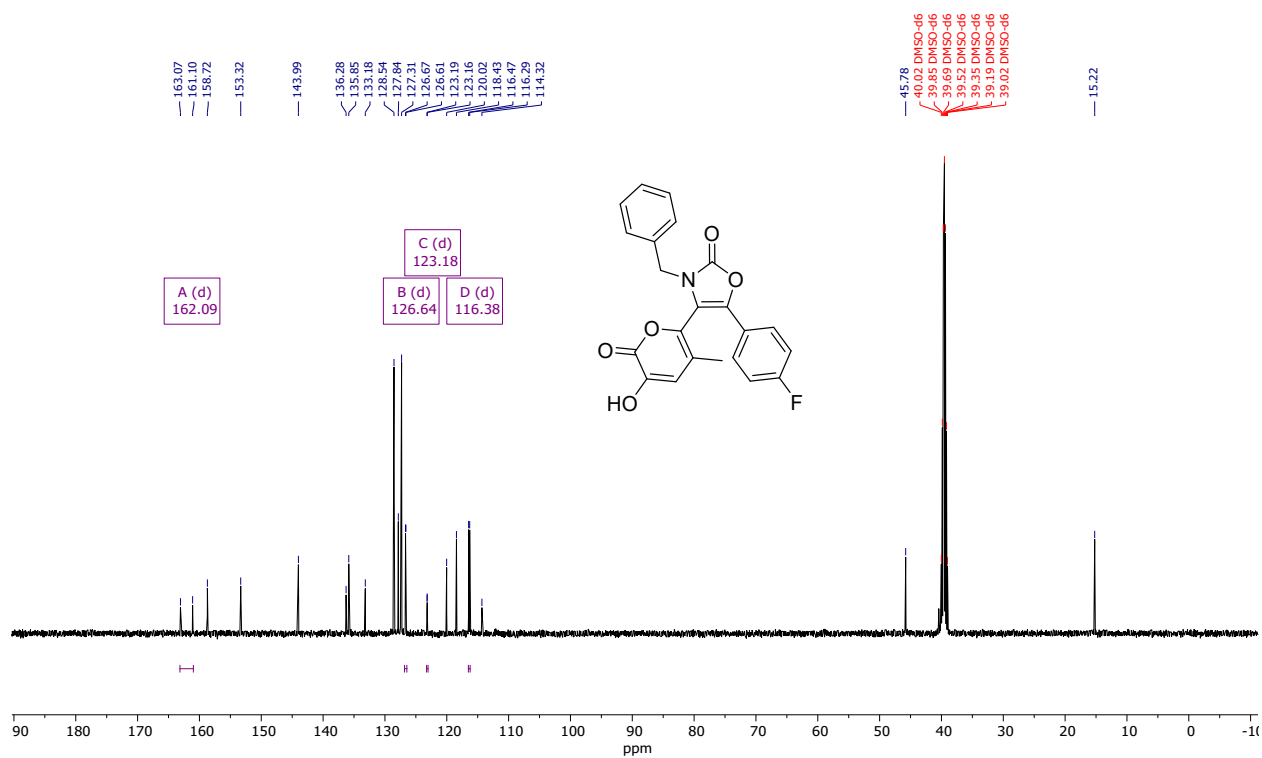

$^{19}\text{F}$  NMR spectrum (282 MHz) of **4p** in  $\text{DMSO-}d_6$

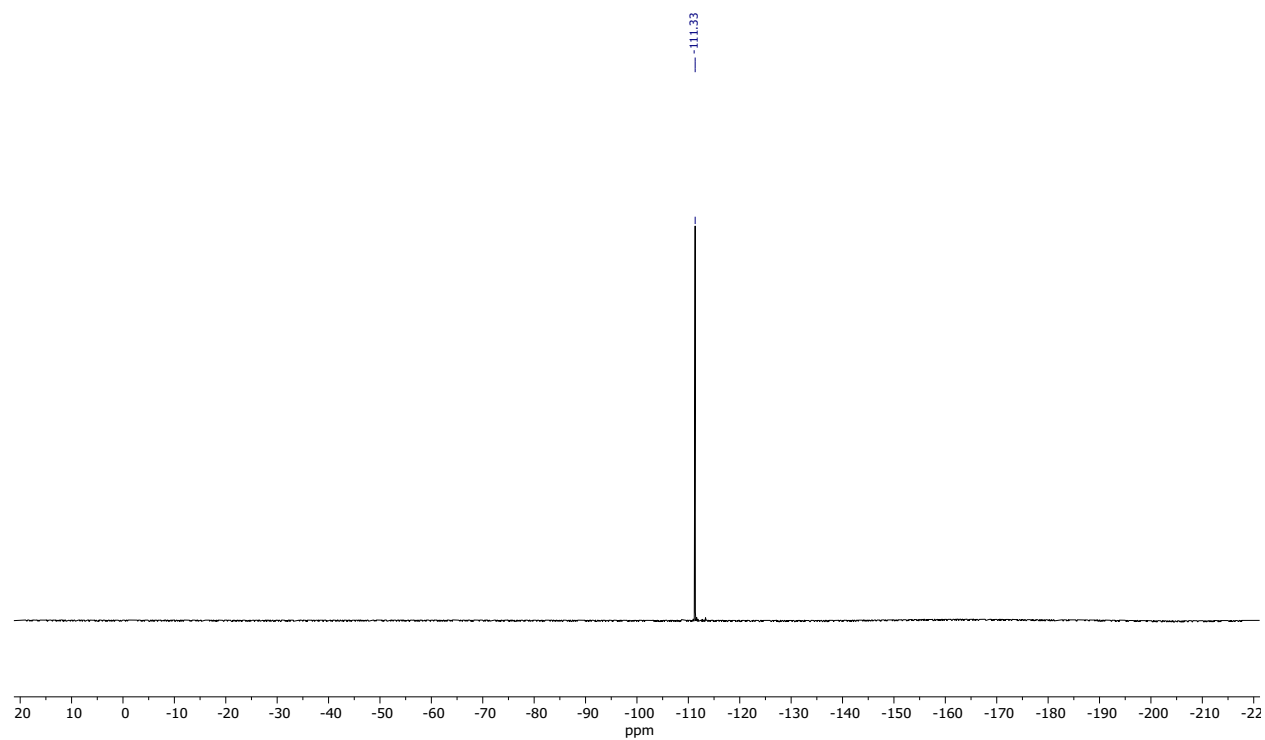

$^1\text{H}$  NMR spectrum (300 MHz) of **7** in  $\text{DMSO-}d_6$

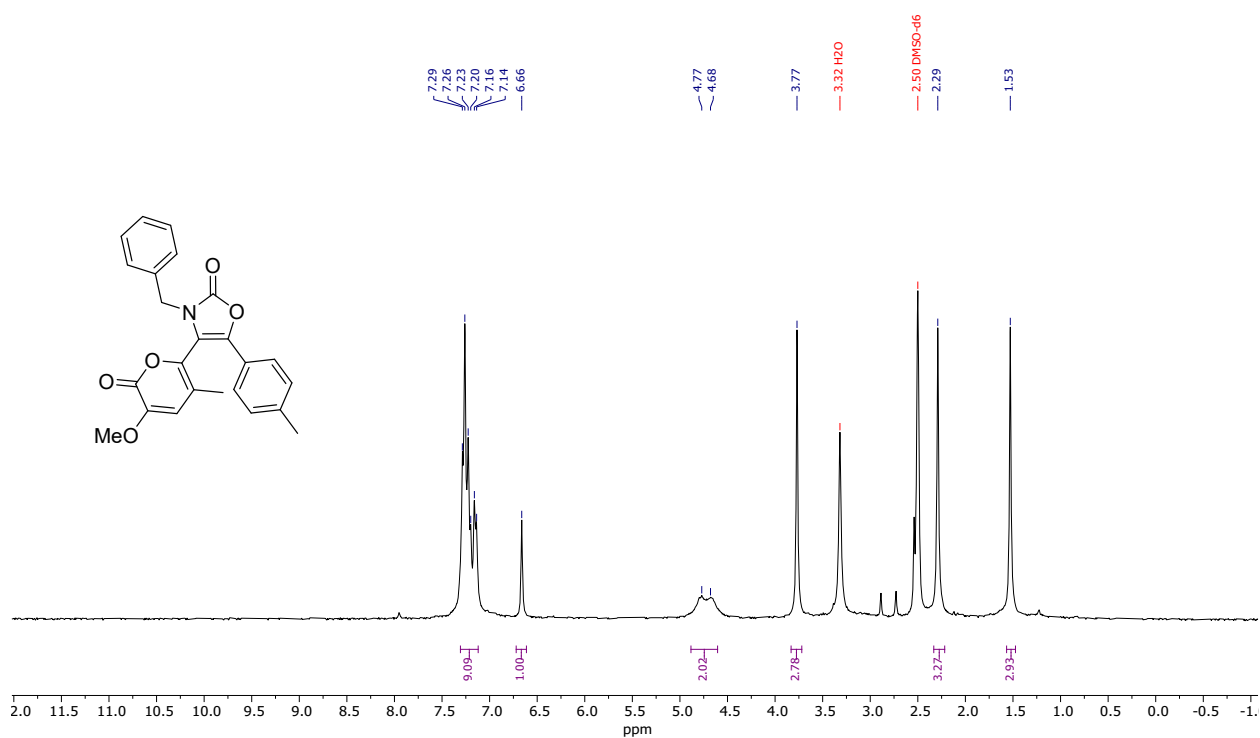

$^{13}\text{C}$   $\{^1\text{H}\}$  NMR spectrum (75 MHz) of **7** in  $\text{DMSO-}d_6$

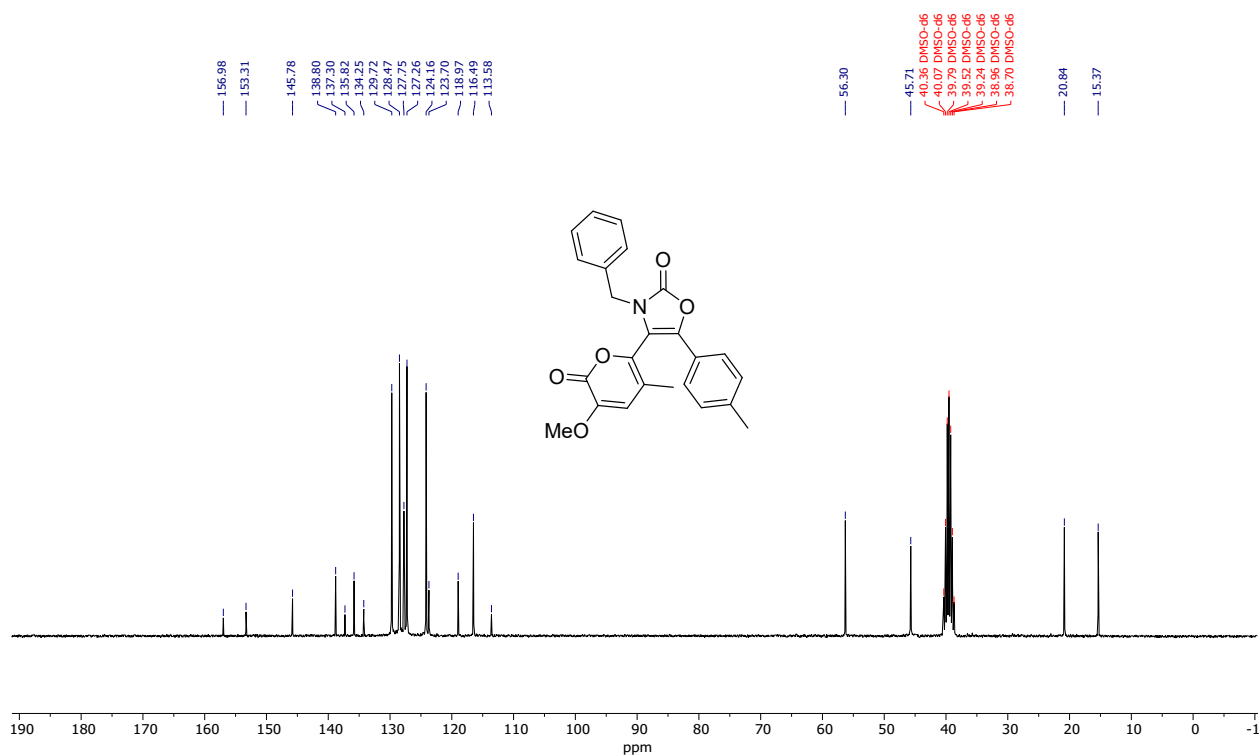

$^1\text{H}$  NMR spectrum (300 MHz) of **10** in  $\text{DMSO-}d_6$

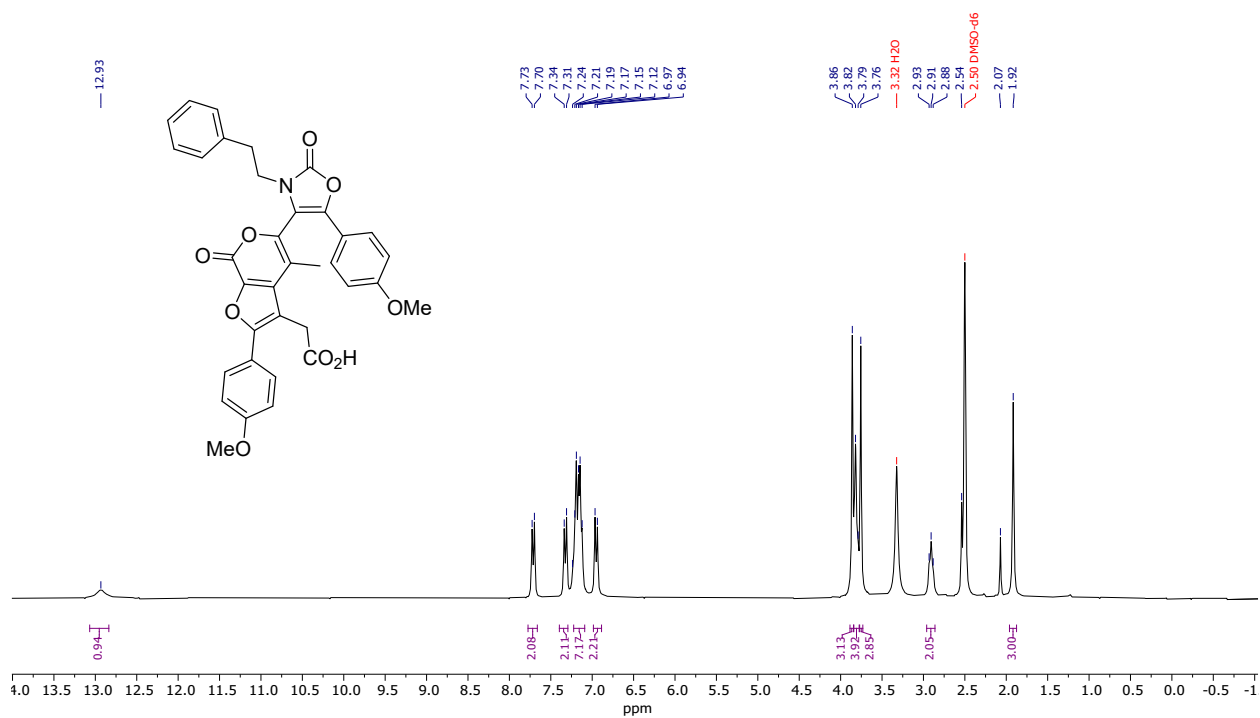

$^{13}\text{C}$   $\{^1\text{H}\}$  NMR spectrum (126 MHz) of **10** in  $\text{DMSO-}d_6$

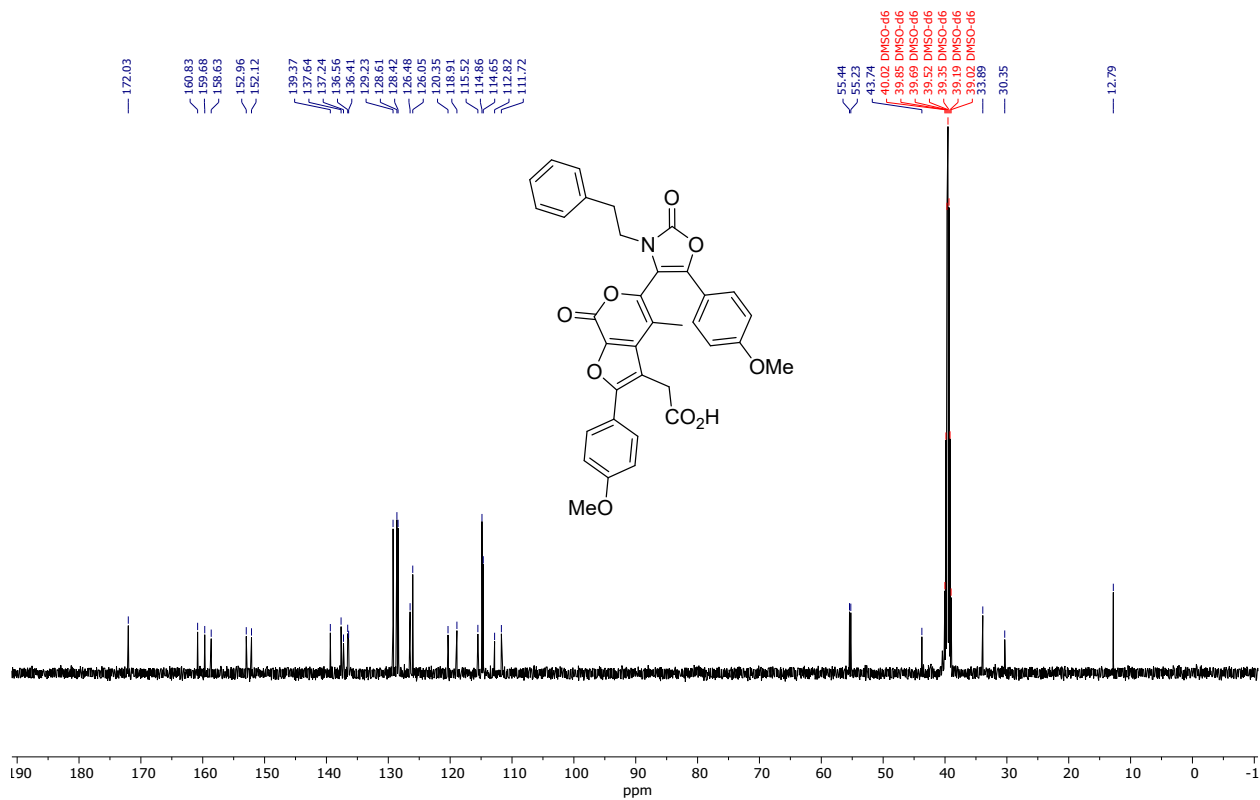

## 5. Copies of HRMS for all compounds

### HRMS for compound 4a

#### Acquisition Parameter

|             |            |                      |          |                  |           |
|-------------|------------|----------------------|----------|------------------|-----------|
| Source Type | ESI        | Ion Polarity         | Positive | Set Nebulizer    | 0.4 Bar   |
| Focus       | Not active |                      |          | Set Dry Heater   | 180 °C    |
| Scan Begin  | 50 m/z     | Set Capillary        | 4500 V   | Set Dry Gas      | 4.0 l/min |
| Scan End    | 2000 m/z   | Set End Plate Offset | -500 V   | Set Divert Valve | Waste     |

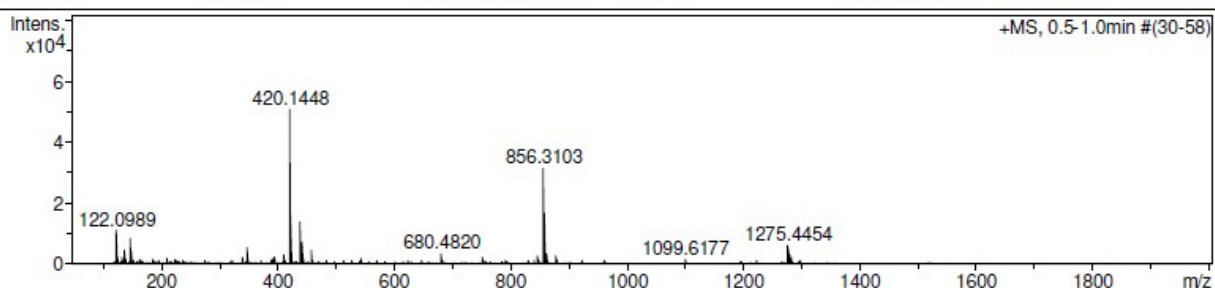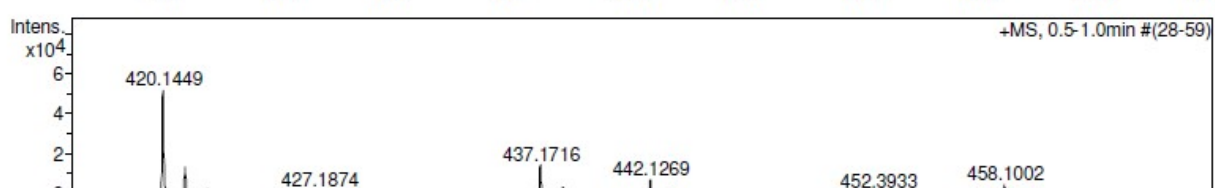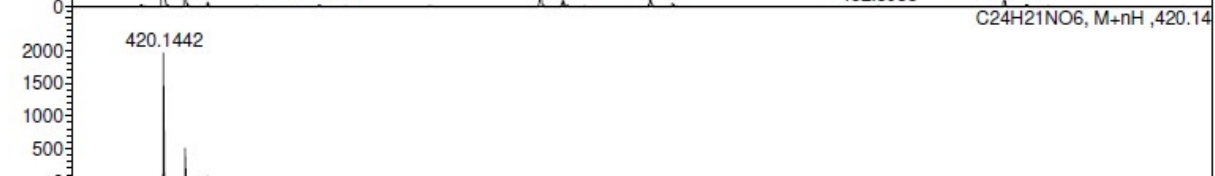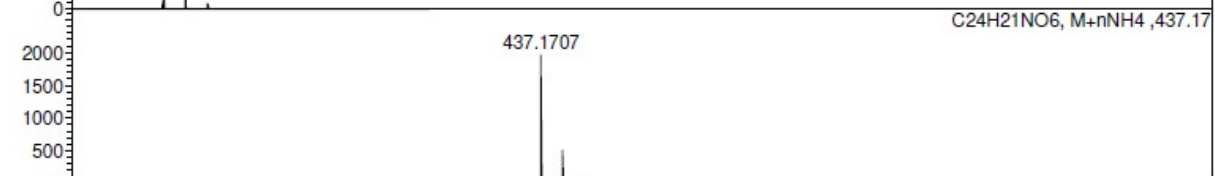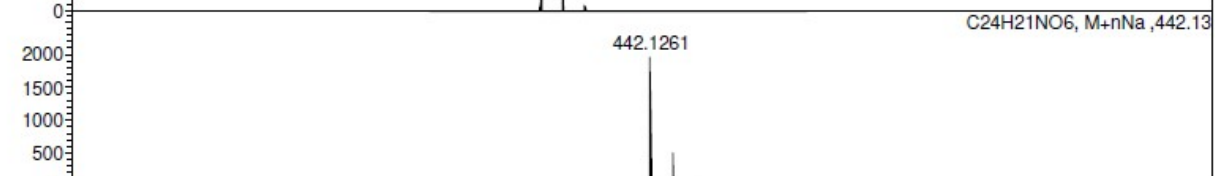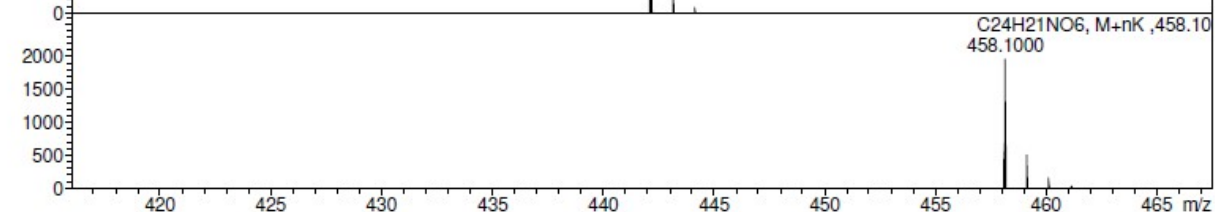

# HRMS for compound **4b**

## Acquisition Parameter

|             |            |                      |          |                  |           |
|-------------|------------|----------------------|----------|------------------|-----------|
| Source Type | ESI        | Ion Polarity         | Positive | Set Nebulizer    | 0.4 Bar   |
| Focus       | Not active |                      |          | Set Dry Heater   | 180 °C    |
| Scan Begin  | 50 m/z     | Set Capillary        | 4500 V   | Set Dry Gas      | 4.0 l/min |
| Scan End    | 2000 m/z   | Set End Plate Offset | -500 V   | Set Divert Valve | Waste     |

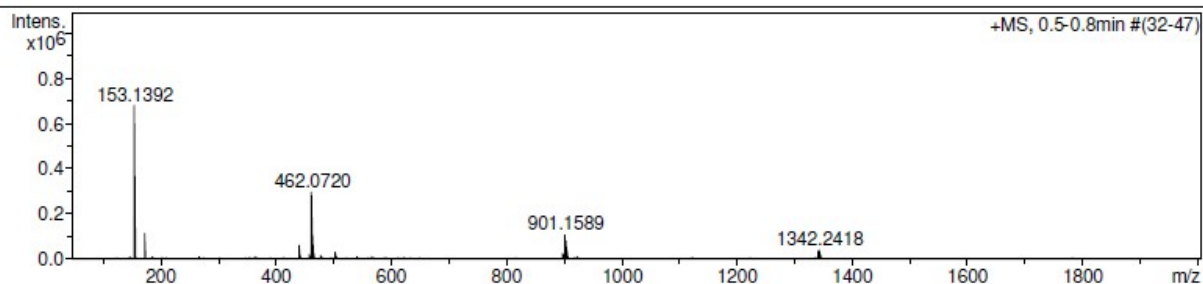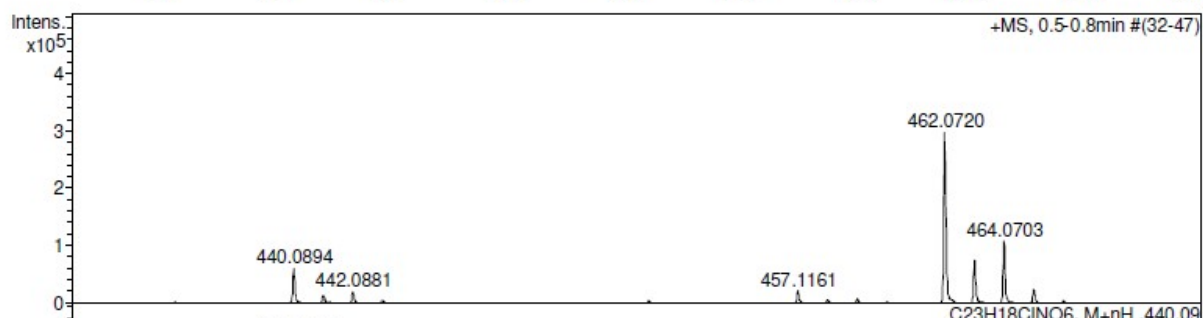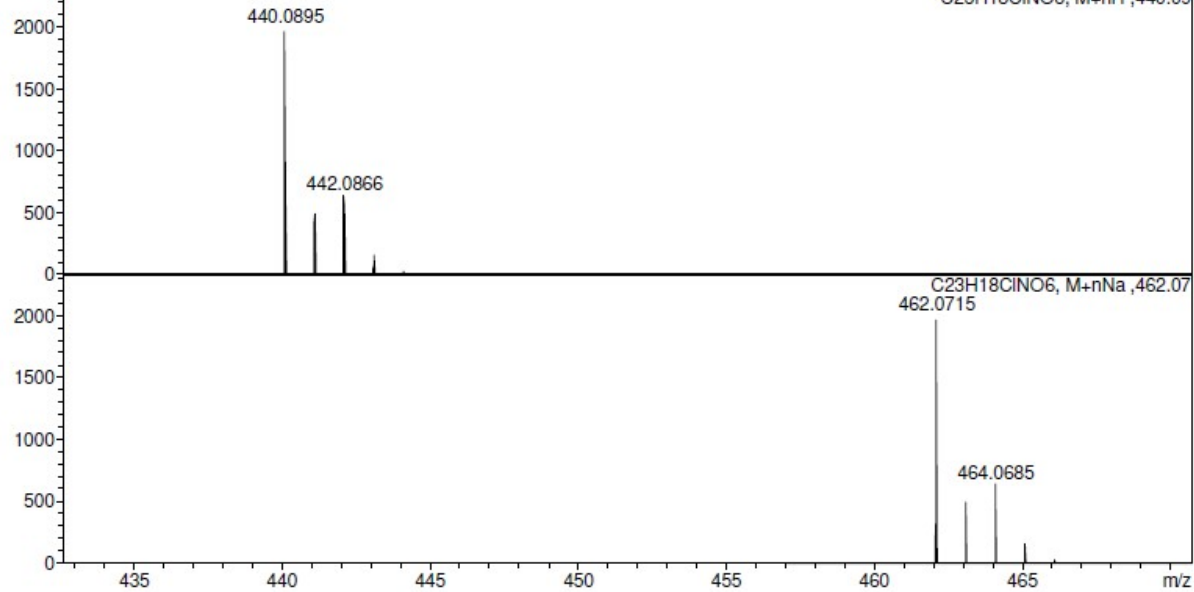



# HRMS for compound 4c

## Acquisition Parameter

|             |            |                      |          |                  |           |
|-------------|------------|----------------------|----------|------------------|-----------|
| Source Type | ESI        | Ion Polarity         | Positive | Set Nebulizer    | 0.4 Bar   |
| Focus       | Not active |                      |          | Set Dry Heater   | 180 °C    |
| Scan Begin  | 50 m/z     | Set Capillary        | 4500 V   | Set Dry Gas      | 4.0 l/min |
| Scan End    | 3000 m/z   | Set End Plate Offset | -500 V   | Set Divert Valve | Waste     |

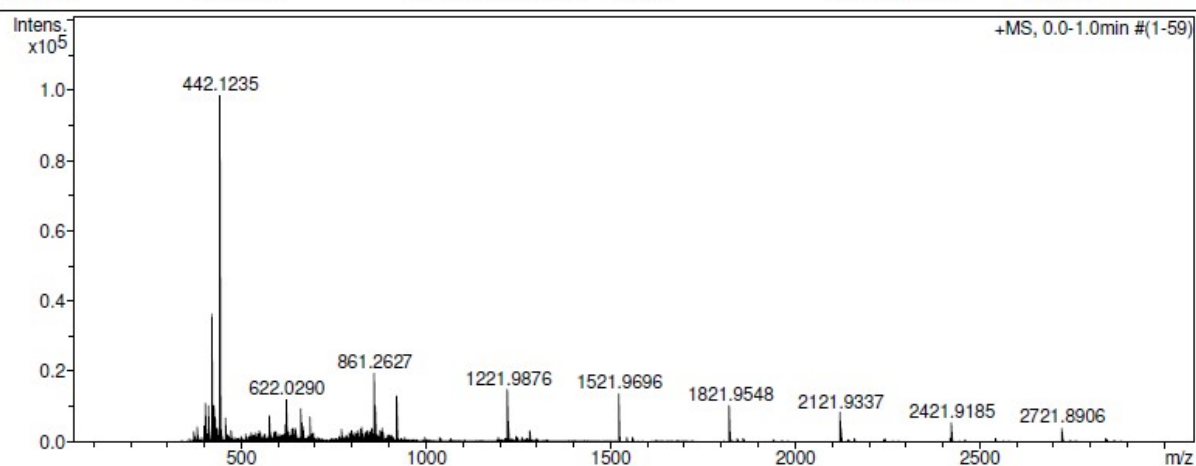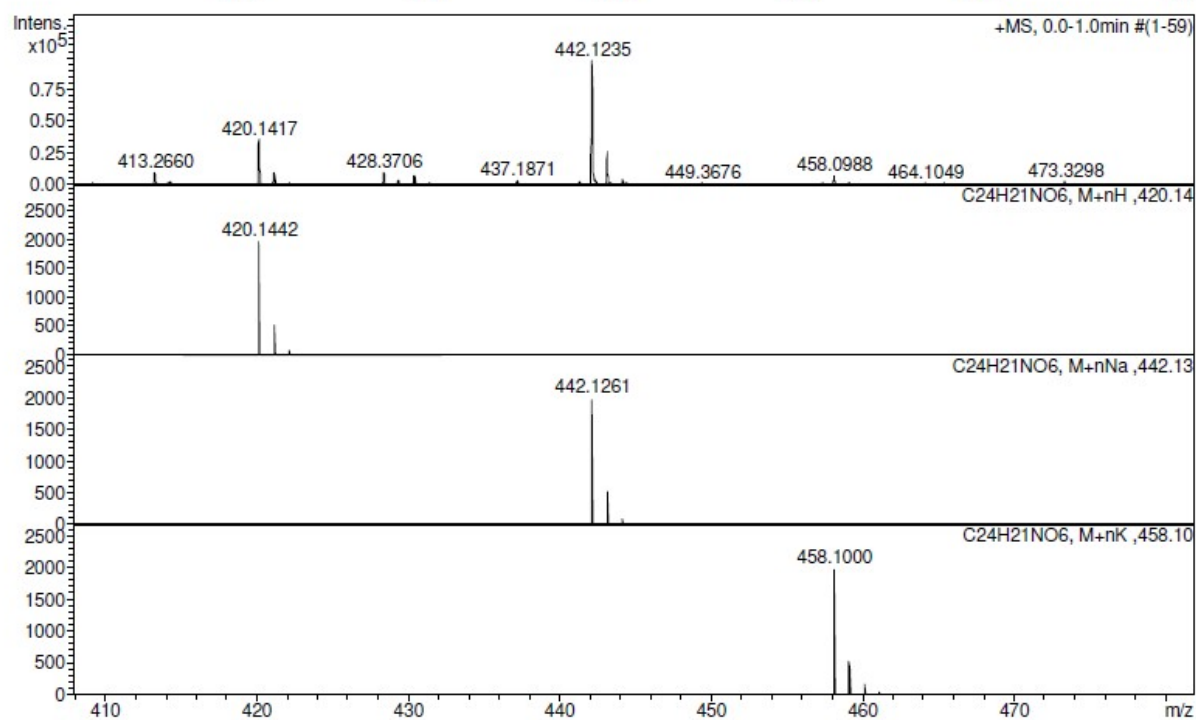

# HRMS for compound **4d**

## Acquisition Parameter

|             |            |                      |          |                  |           |
|-------------|------------|----------------------|----------|------------------|-----------|
| Source Type | ESI        | Ion Polarity         | Positive | Set Nebulizer    | 0.4 Bar   |
| Focus       | Not active |                      |          | Set Dry Heater   | 180 °C    |
| Scan Begin  | 50 m/z     | Set Capillary        | 4500 V   | Set Dry Gas      | 4.0 l/min |
| Scan End    | 3000 m/z   | Set End Plate Offset | -500 V   | Set Divert Valve | Waste     |

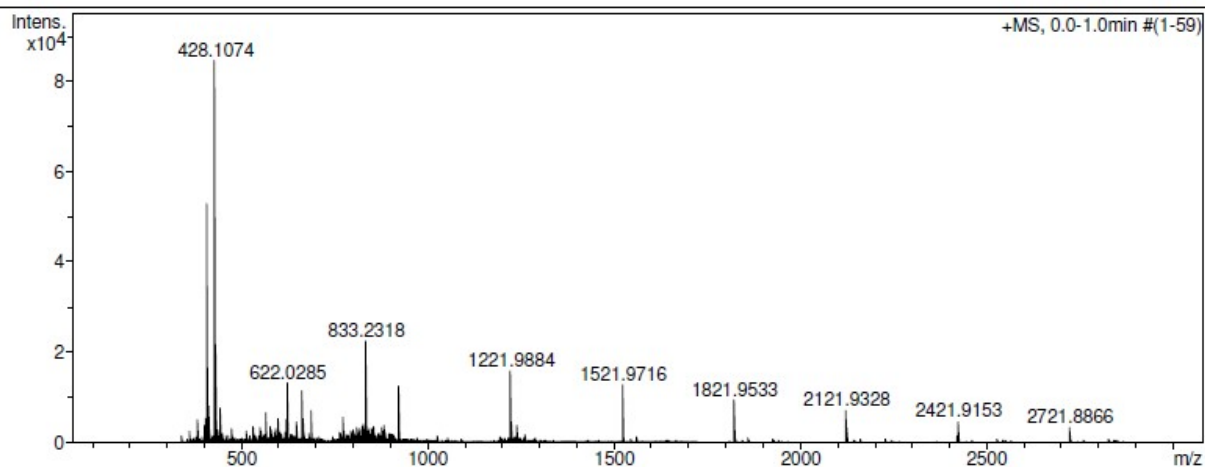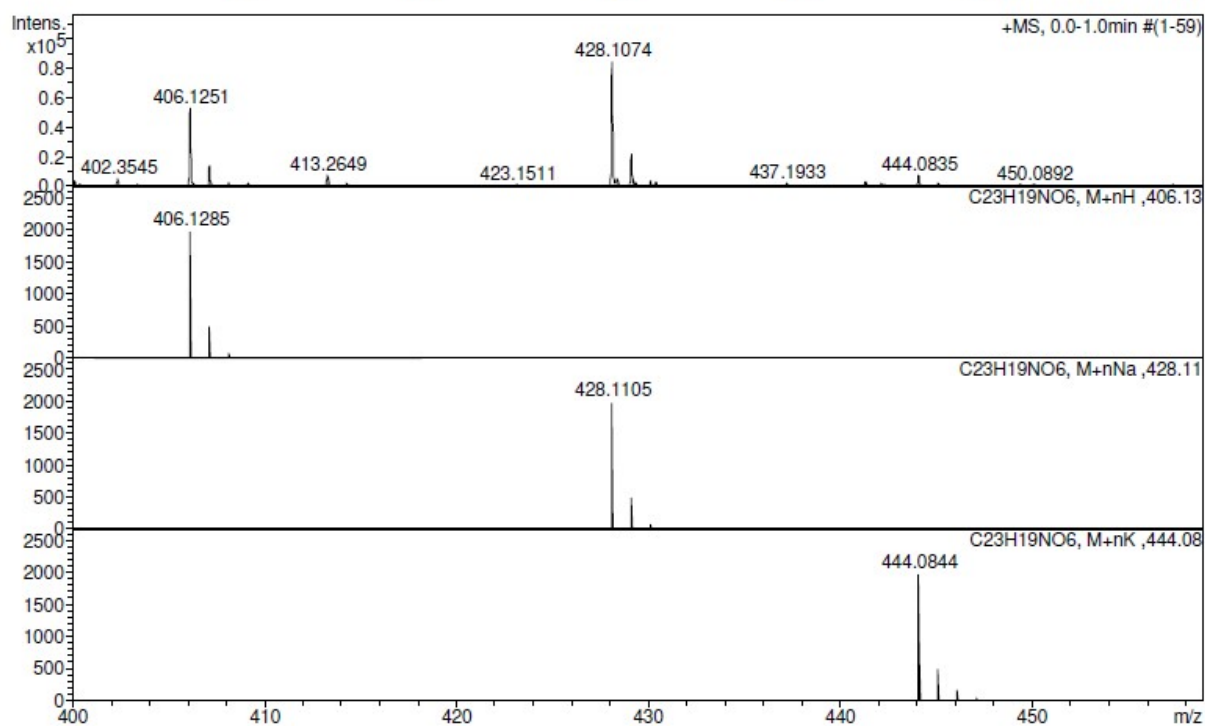

# HRMS for compound 4e

## Acquisition Parameter

|             |            |                      |          |                  |           |
|-------------|------------|----------------------|----------|------------------|-----------|
| Source Type | ESI        | Ion Polarity         | Positive | Set Nebulizer    | 0.4 Bar   |
| Focus       | Not active |                      |          | Set Dry Heater   | 180 °C    |
| Scan Begin  | 50 m/z     | Set Capillary        | 4500 V   | Set Dry Gas      | 4.0 l/min |
| Scan End    | 2500 m/z   | Set End Plate Offset | -500 V   | Set Divert Valve | Waste     |

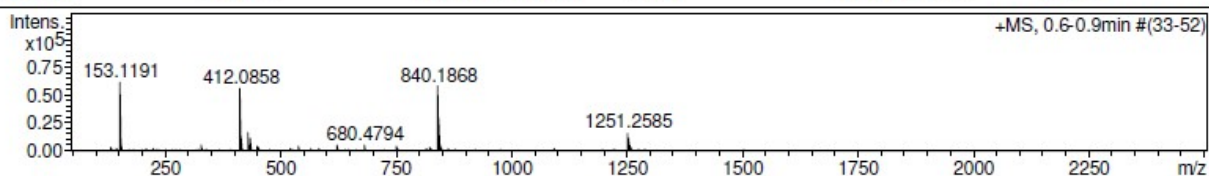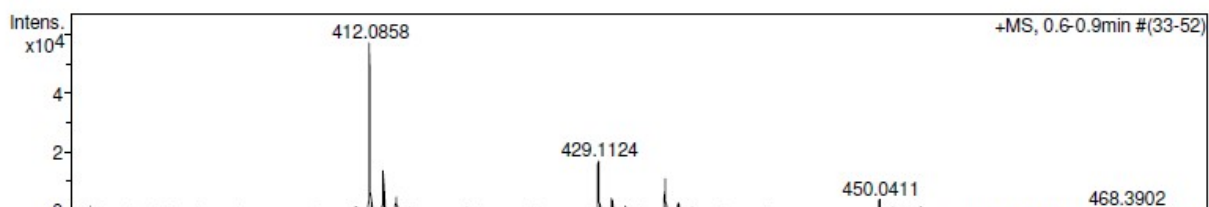

C<sub>21</sub>H<sub>17</sub>NO<sub>6</sub>S, M+nH, 412.09

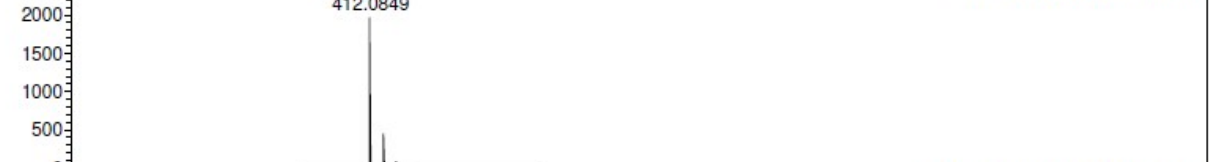

C<sub>21</sub>H<sub>17</sub>NO<sub>6</sub>S, M+nNH<sub>4</sub>, 429.11

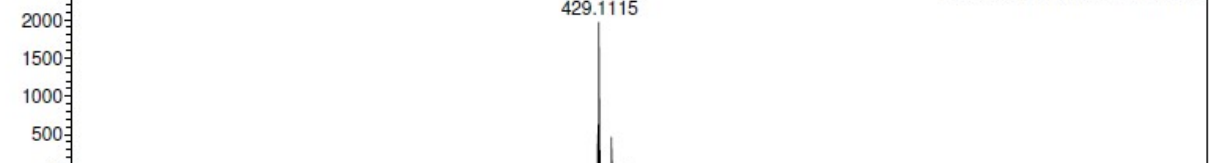

C<sub>21</sub>H<sub>17</sub>NO<sub>6</sub>S, M+nNa, 434.07

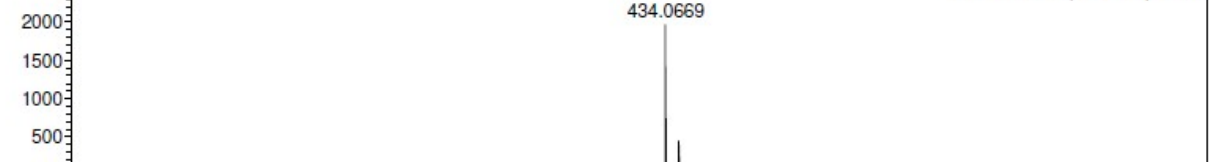

C<sub>21</sub>H<sub>17</sub>NO<sub>6</sub>S, M+nK, 450.04

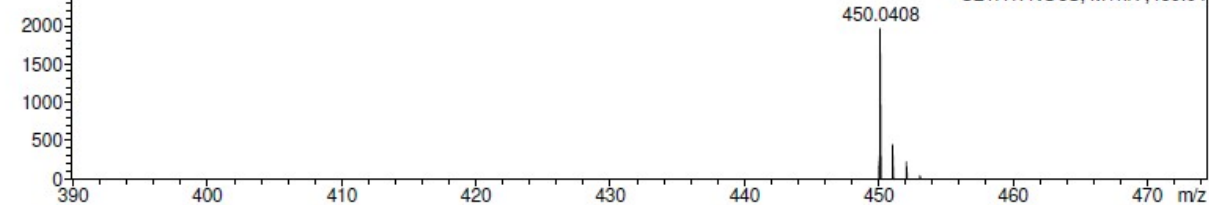

# HRMS for compound 4f

## Acquisition Parameter

|             |            |                      |          |                  |           |
|-------------|------------|----------------------|----------|------------------|-----------|
| Source Type | ESI        | Ion Polarity         | Positive | Set Nebulizer    | 0.4 Bar   |
| Focus       | Not active |                      |          | Set Dry Heater   | 180 °C    |
| Scan Begin  | 50 m/z     | Set Capillary        | 4500 V   | Set Dry Gas      | 4.0 l/min |
| Scan End    | 2500 m/z   | Set End Plate Offset | -500 V   | Set Divert Valve | Waste     |

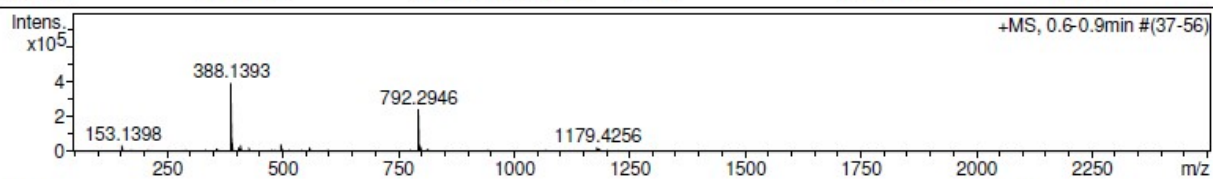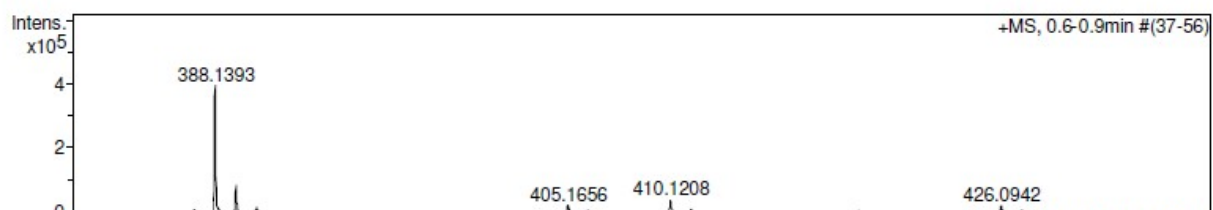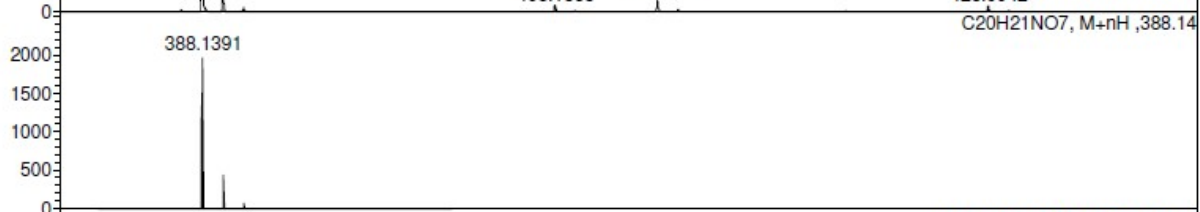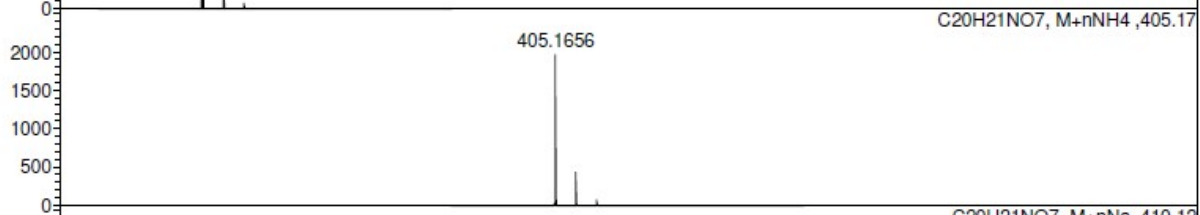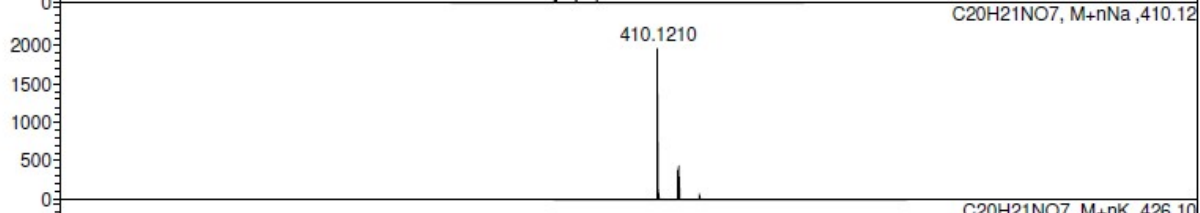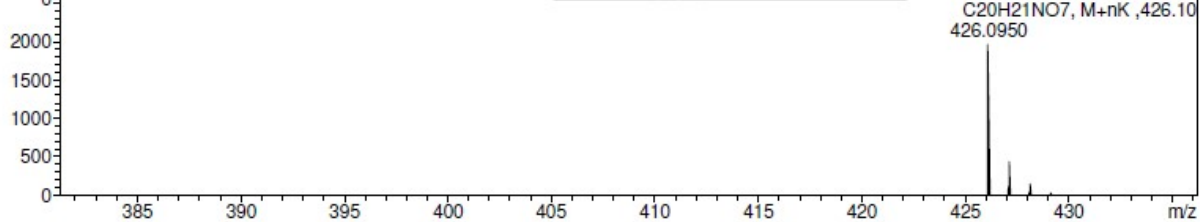

# HRMS for compound **4g**

## Acquisition Parameter

|             |            |                      |          |                  |           |
|-------------|------------|----------------------|----------|------------------|-----------|
| Source Type | ESI        | Ion Polarity         | Positive | Set Nebulizer    | 0.4 Bar   |
| Focus       | Not active |                      |          | Set Dry Heater   | 180 °C    |
| Scan Begin  | 50 m/z     | Set Capillary        | 4500 V   | Set Dry Gas      | 4.0 l/min |
| Scan End    | 2500 m/z   | Set End Plate Offset | -500 V   | Set Divert Valve | Waste     |

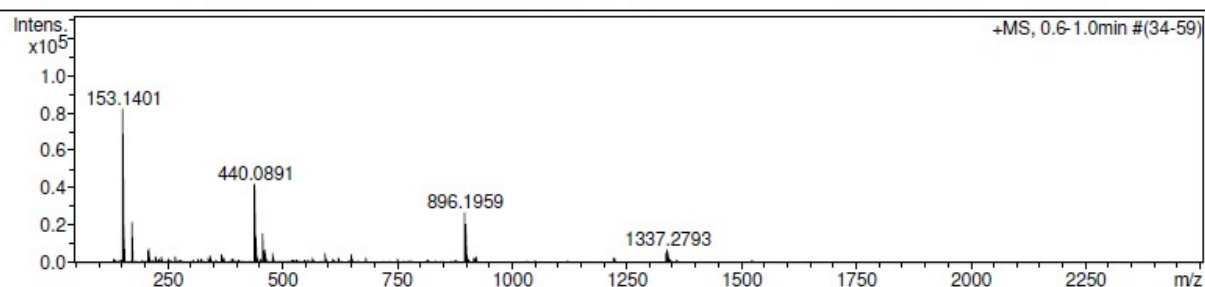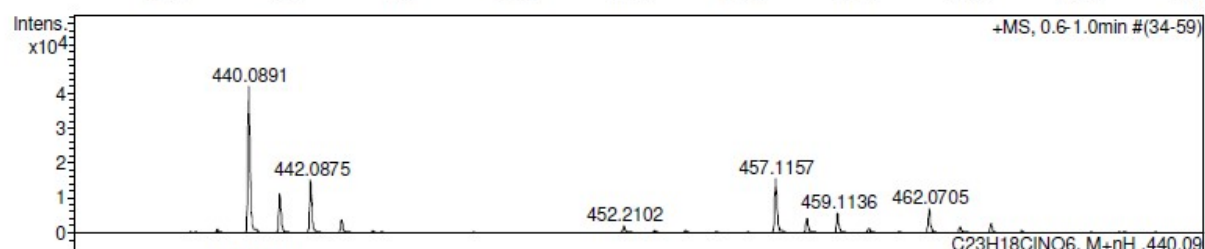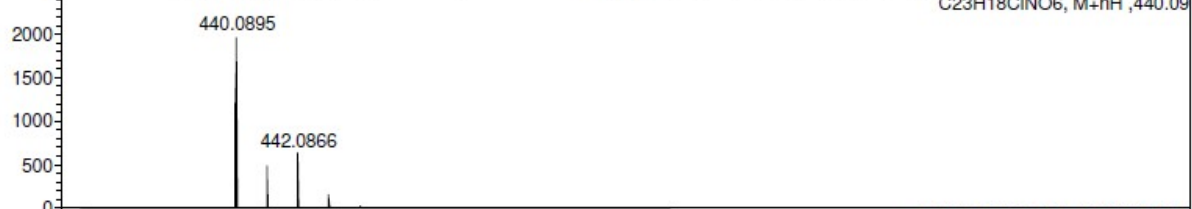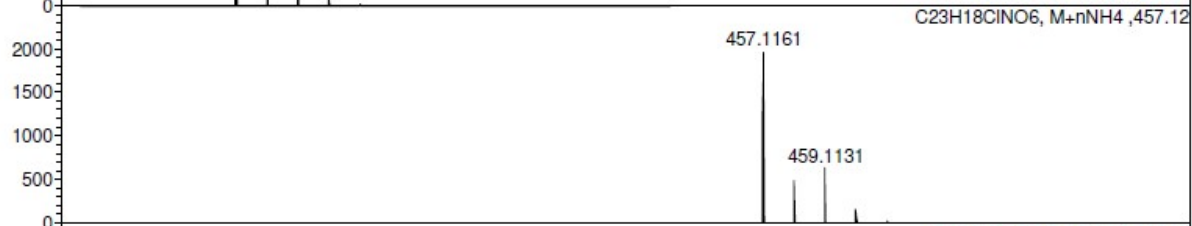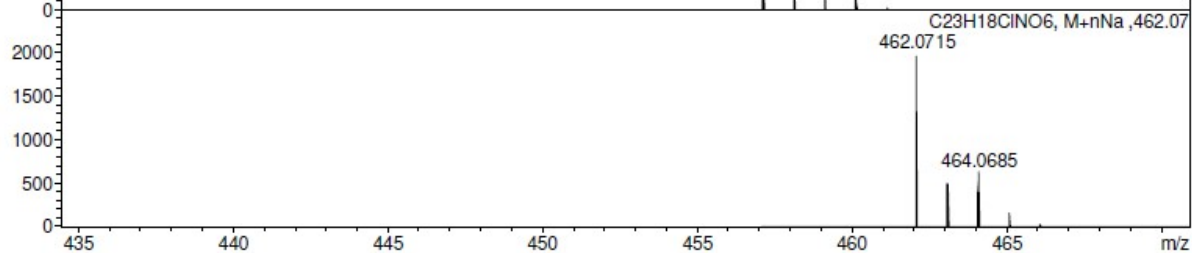

# HRMS for compound 4h

## Acquisition Parameter

|             |            |                      |          |                  |           |
|-------------|------------|----------------------|----------|------------------|-----------|
| Source Type | ESI        | Ion Polarity         | Positive | Set Nebulizer    | 0.4 Bar   |
| Focus       | Not active |                      |          | Set Dry Heater   | 180 °C    |
| Scan Begin  | 50 m/z     | Set Capillary        | 4500 V   | Set Dry Gas      | 4.0 l/min |
| Scan End    | 2500 m/z   | Set End Plate Offset | -500 V   | Set Divert Valve | Waste     |

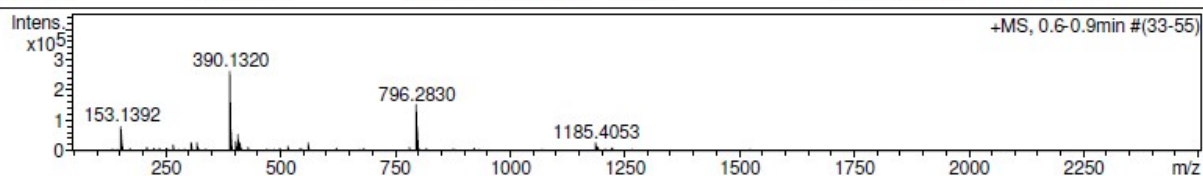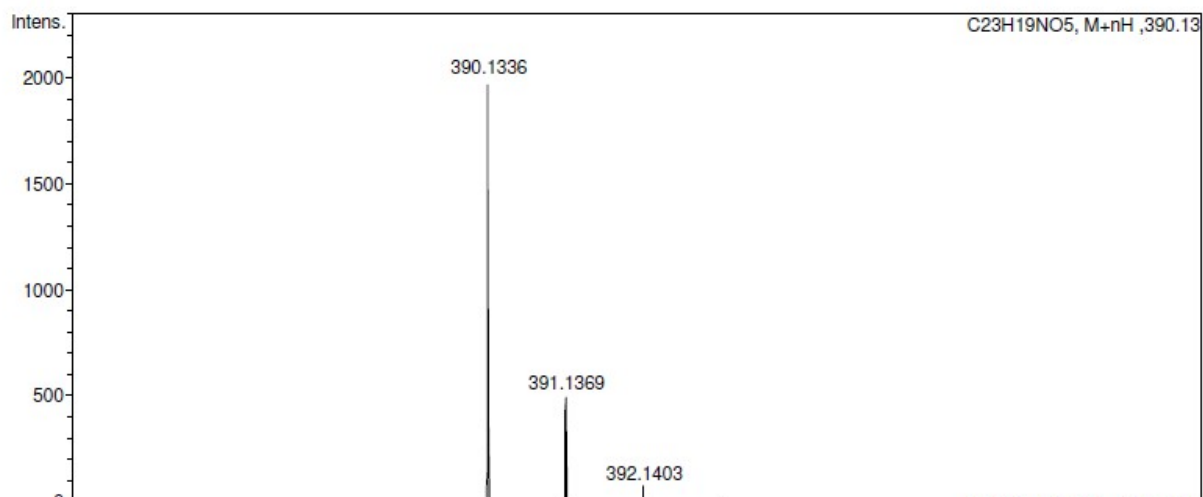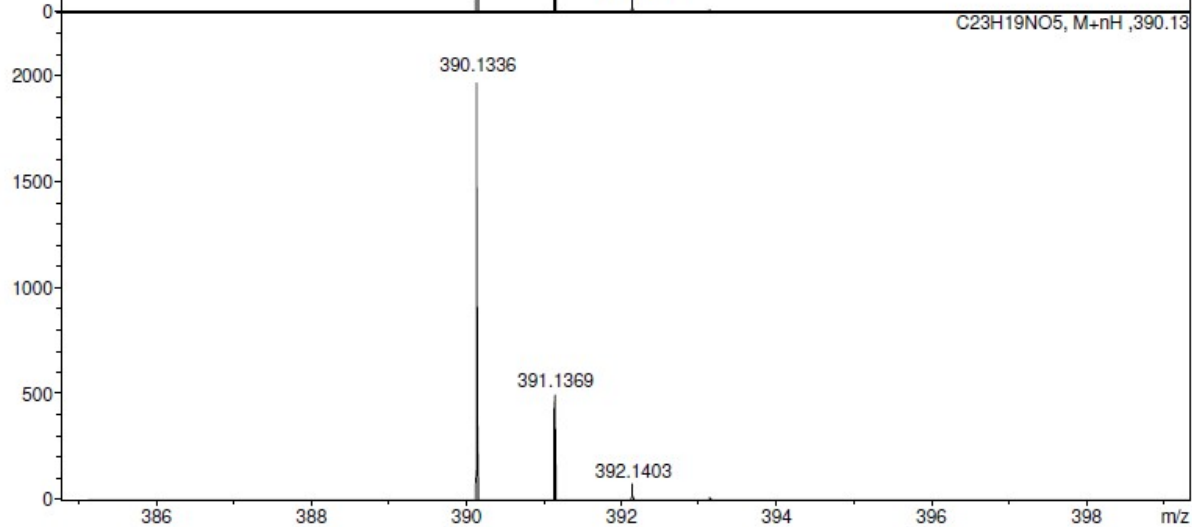

# HRMS for compound 4i

## Acquisition Parameter

|             |            |                      |          |                  |           |
|-------------|------------|----------------------|----------|------------------|-----------|
| Source Type | ESI        | Ion Polarity         | Positive | Set Nebulizer    | 0.4 Bar   |
| Focus       | Not active |                      |          | Set Dry Heater   | 180 °C    |
| Scan Begin  | 50 m/z     | Set Capillary        | 4500 V   | Set Dry Gas      | 4.0 l/min |
| Scan End    | 2500 m/z   | Set End Plate Offset | -500 V   | Set Divert Valve | Waste     |

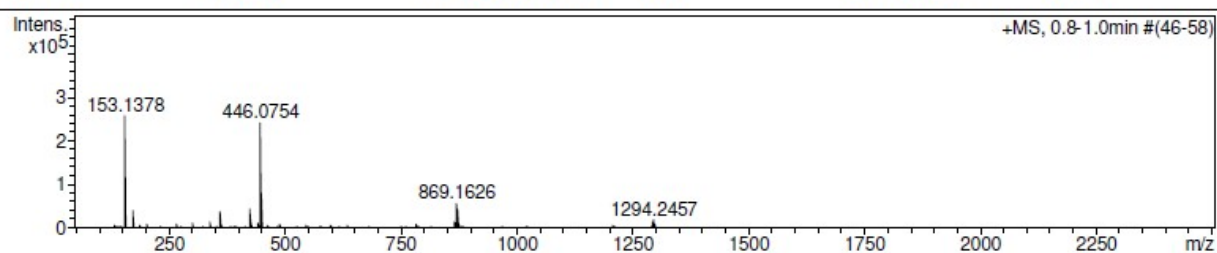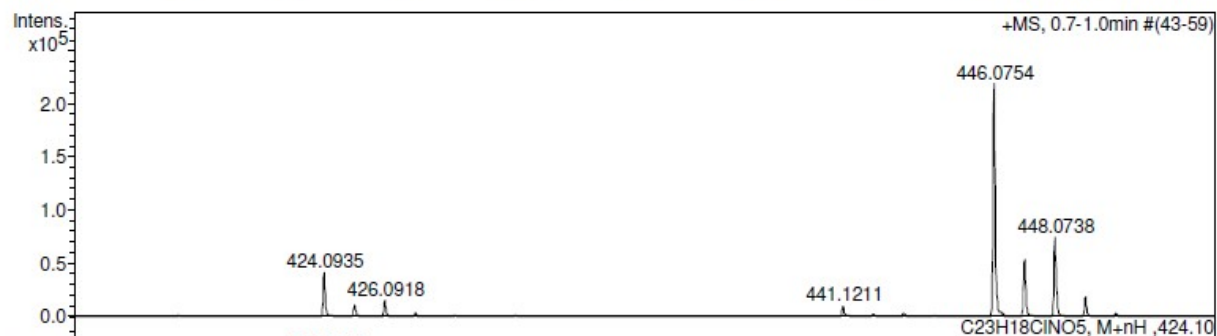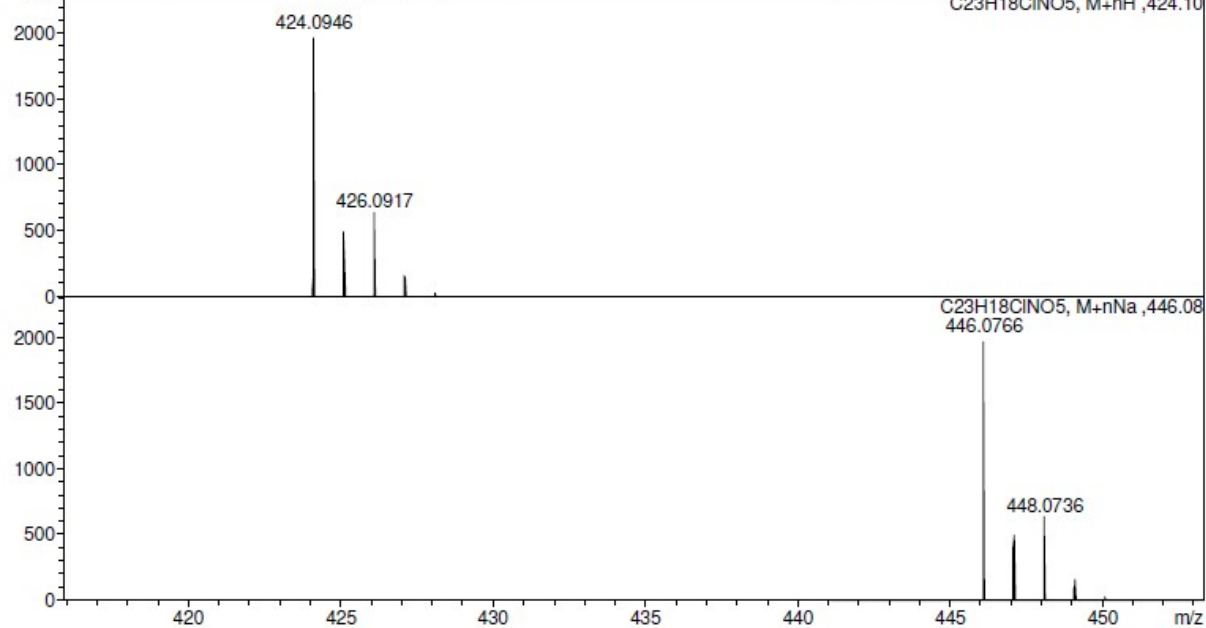

# HRMS for compound 4j

## Acquisition Parameter

|             |            |                      |          |                  |           |
|-------------|------------|----------------------|----------|------------------|-----------|
| Source Type | ESI        | Ion Polarity         | Positive | Set Nebulizer    | 0.4 Bar   |
| Focus       | Not active |                      |          | Set Dry Heater   | 180 °C    |
| Scan Begin  | 50 m/z     | Set Capillary        | 4500 V   | Set Dry Gas      | 4.0 l/min |
| Scan End    | 2500 m/z   | Set End Plate Offset | -500 V   | Set Divert Valve | Waste     |

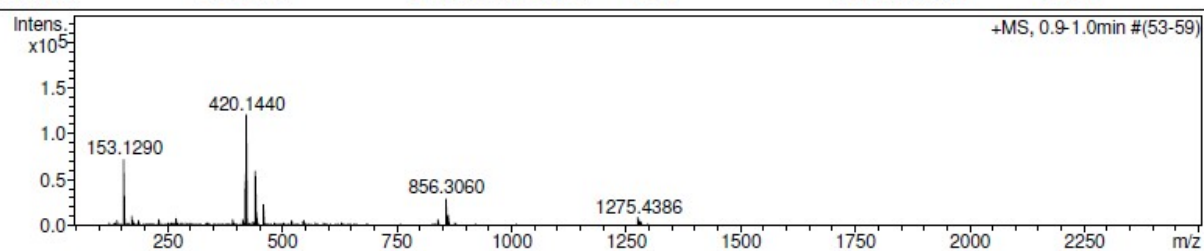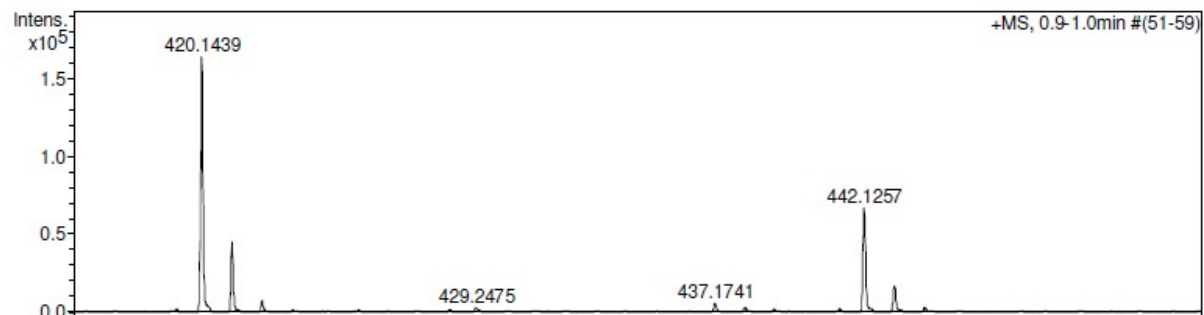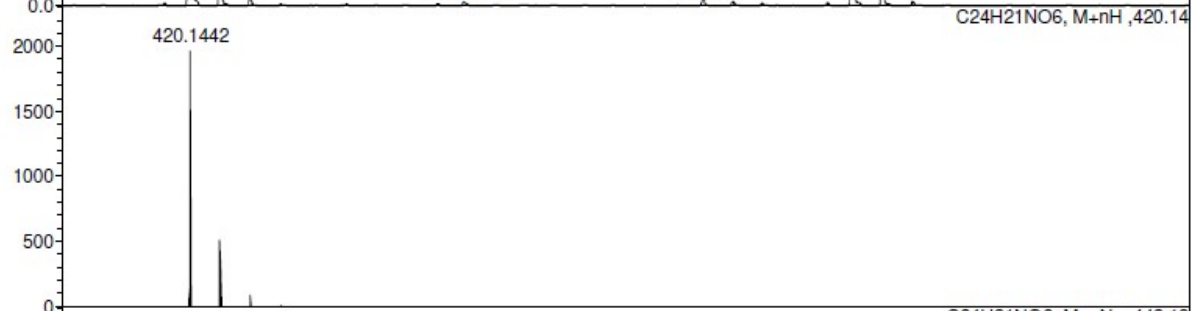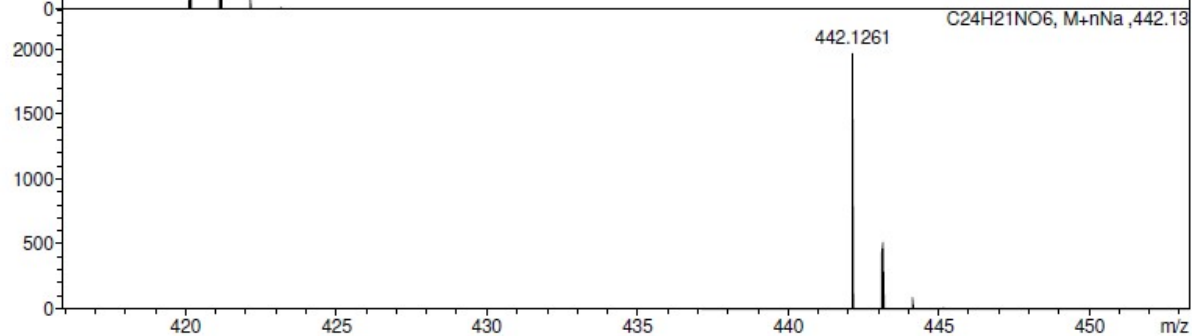



# HRMS for compound 4k

## Acquisition Parameter

|             |            |                      |          |                  |           |
|-------------|------------|----------------------|----------|------------------|-----------|
| Source Type | ESI        | Ion Polarity         | Positive | Set Nebulizer    | 0.4 Bar   |
| Focus       | Not active |                      |          | Set Dry Heater   | 180 °C    |
| Scan Begin  | 50 m/z     | Set Capillary        | 4500 V   | Set Dry Gas      | 4.0 l/min |
| Scan End    | 2000 m/z   | Set End Plate Offset | -500 V   | Set Divert Valve | Waste     |

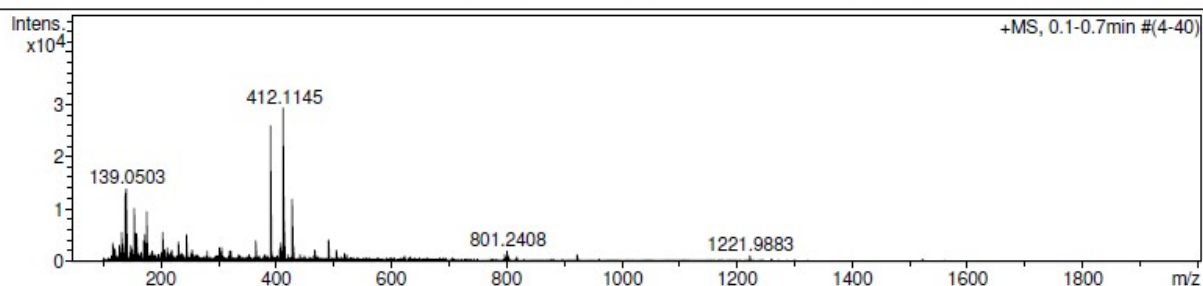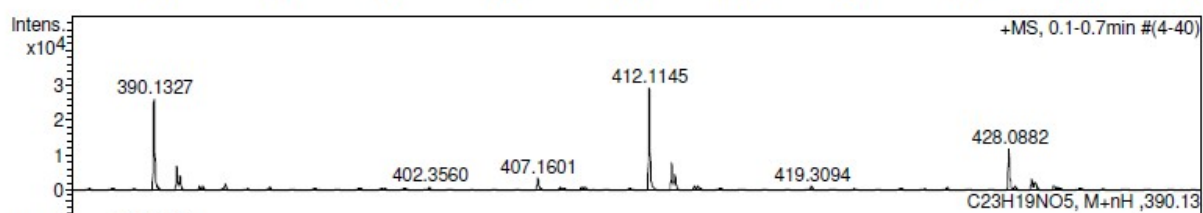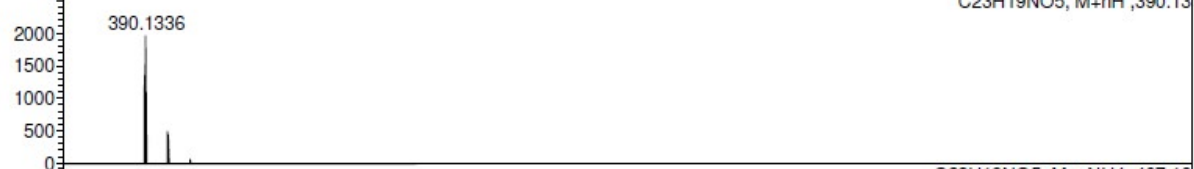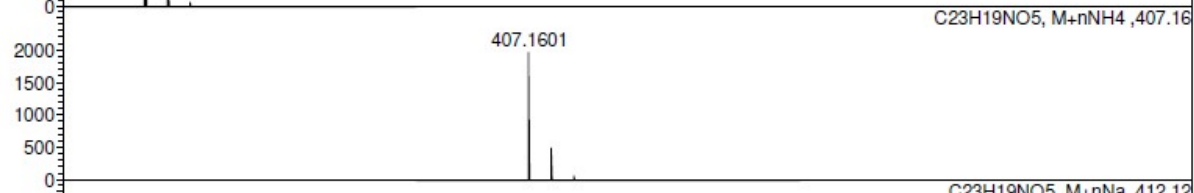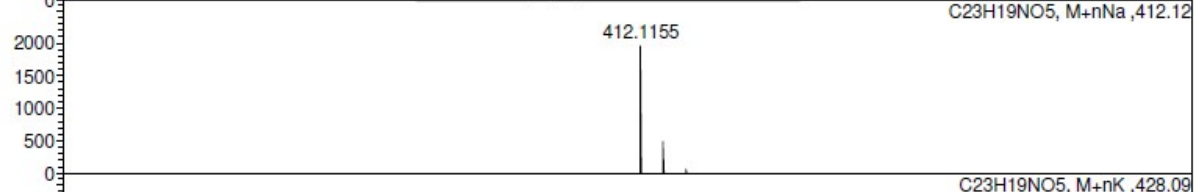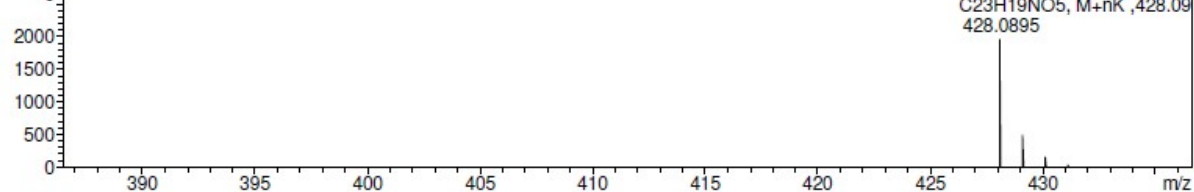

# HRMS for compound 4I

## Acquisition Parameter

|             |            |                      |          |                  |           |
|-------------|------------|----------------------|----------|------------------|-----------|
| Source Type | ESI        | Ion Polarity         | Positive | Set Nebulizer    | 0.4 Bar   |
| Focus       | Not active |                      |          | Set Dry Heater   | 180 °C    |
| Scan Begin  | 50 m/z     | Set Capillary        | 4500 V   | Set Dry Gas      | 4.0 l/min |
| Scan End    | 3000 m/z   | Set End Plate Offset | -500 V   | Set Divert Valve | Waste     |

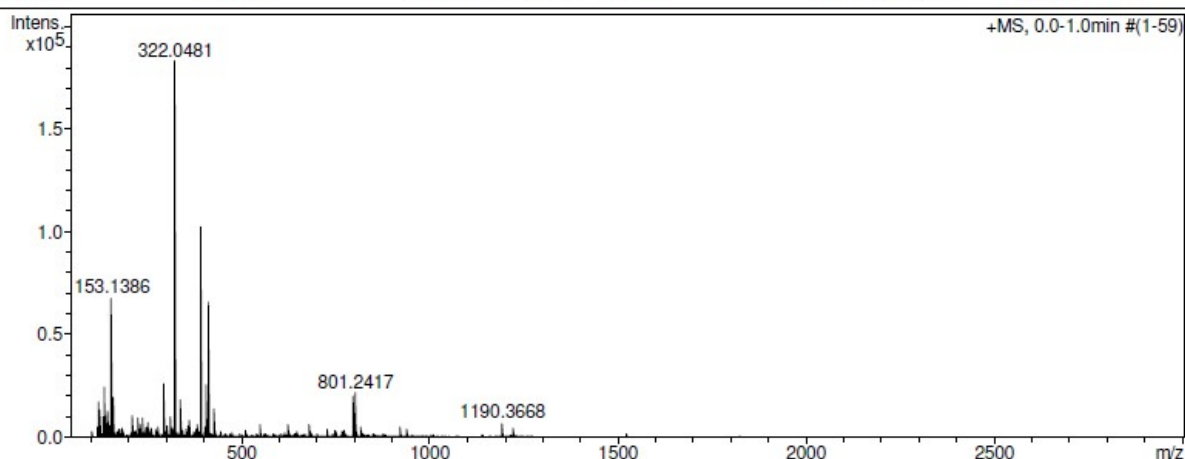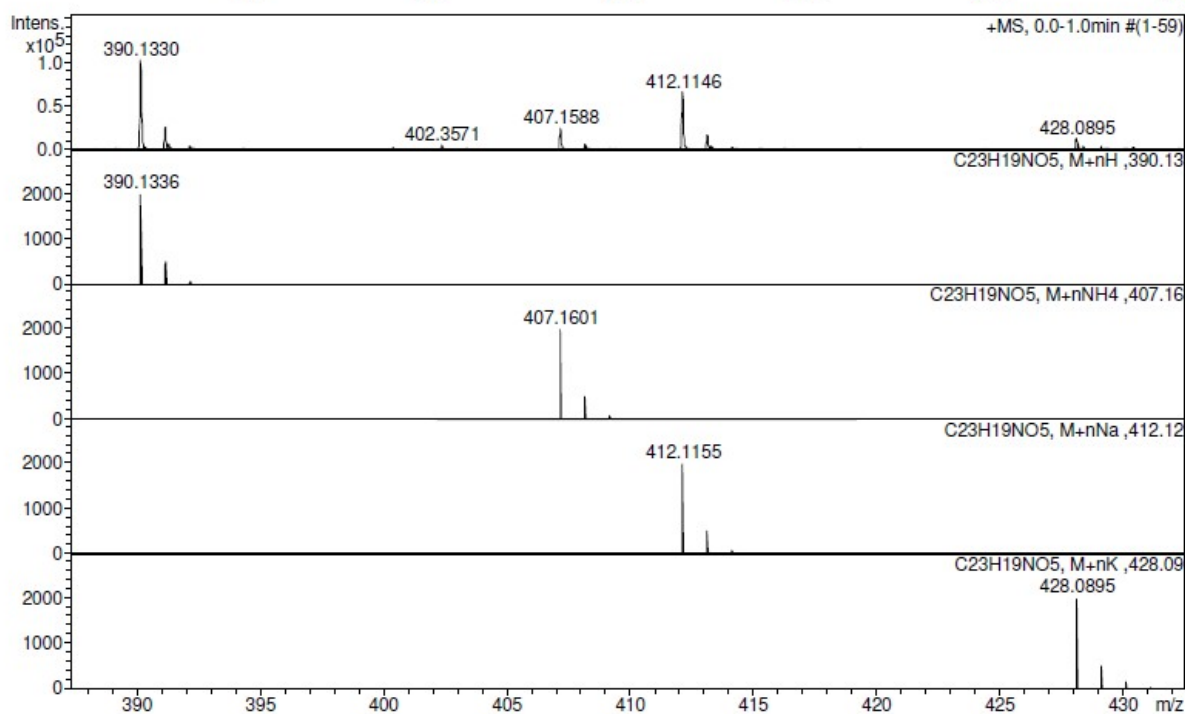

# HRMS for compound 4m

## Acquisition Parameter

|             |            |                      |          |                  |           |
|-------------|------------|----------------------|----------|------------------|-----------|
| Source Type | ESI        | Ion Polarity         | Positive | Set Nebulizer    | 0.4 Bar   |
| Focus       | Not active |                      |          | Set Dry Heater   | 180 °C    |
| Scan Begin  | 50 m/z     | Set Capillary        | 4500 V   | Set Dry Gas      | 4.0 l/min |
| Scan End    | 2500 m/z   | Set End Plate Offset | -500 V   | Set Divert Valve | Waste     |

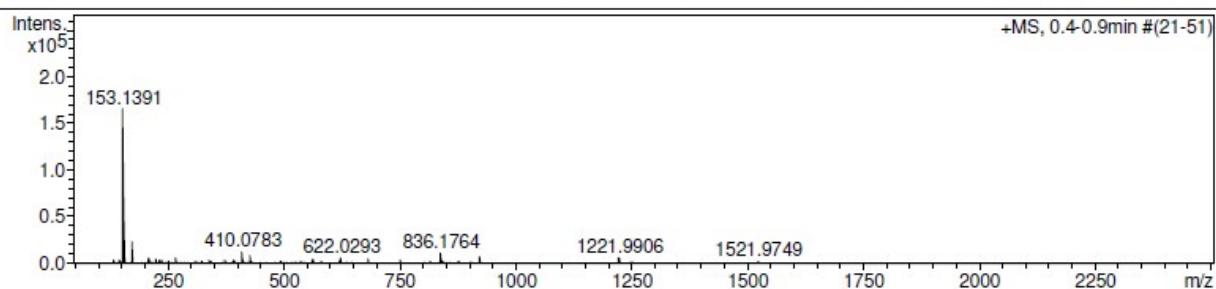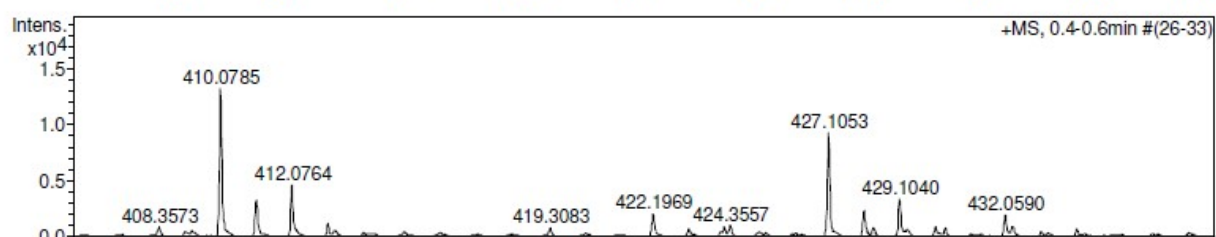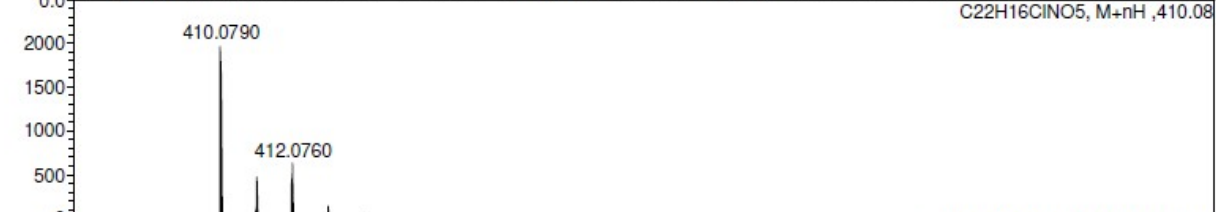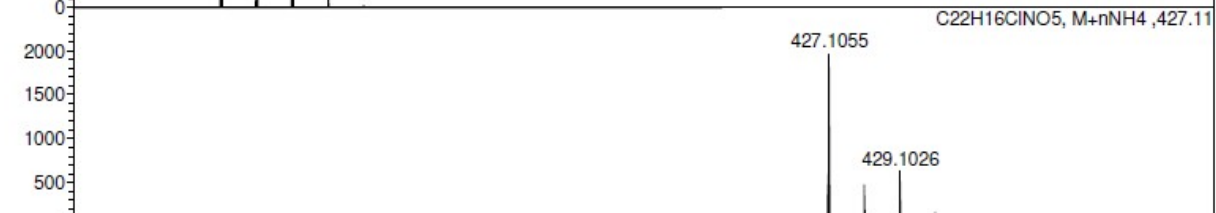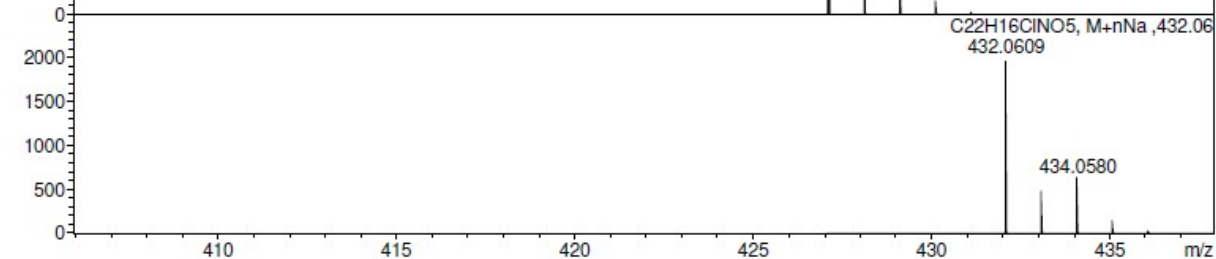

# HRMS for compound 4n

## Acquisition Parameter

|             |            |                      |          |                  |           |
|-------------|------------|----------------------|----------|------------------|-----------|
| Source Type | ESI        | Ion Polarity         | Positive | Set Nebulizer    | 0.4 Bar   |
| Focus       | Not active |                      |          | Set Dry Heater   | 180 °C    |
| Scan Begin  | 50 m/z     | Set Capillary        | 4500 V   | Set Dry Gas      | 4.0 l/min |
| Scan End    | 2500 m/z   | Set End Plate Offset | -500 V   | Set Divert Valve | Waste     |

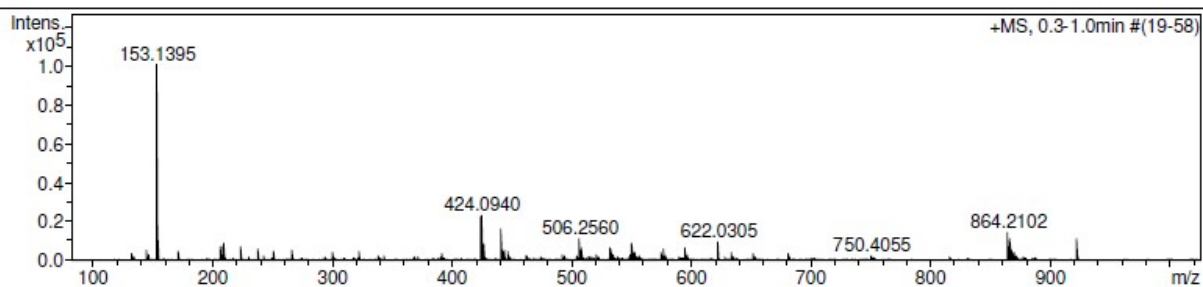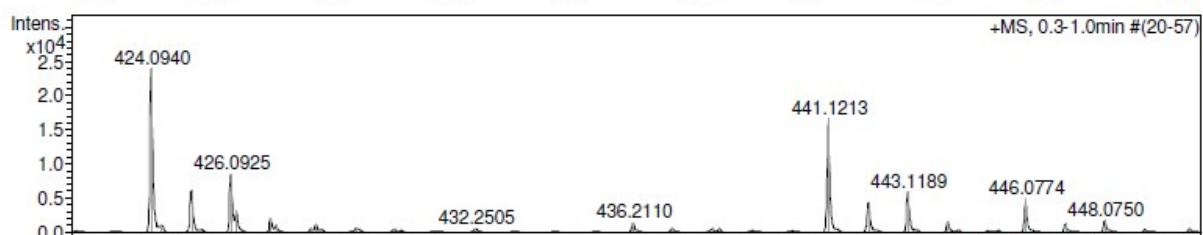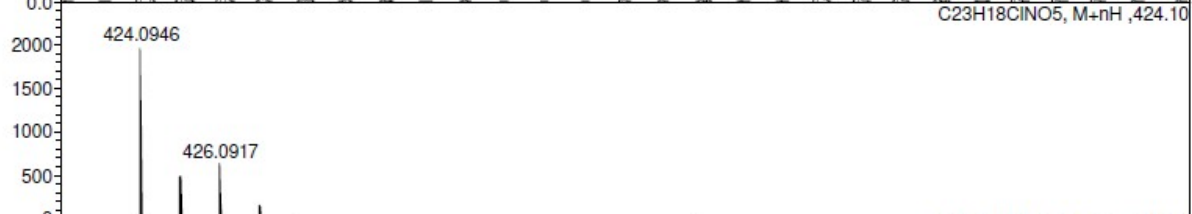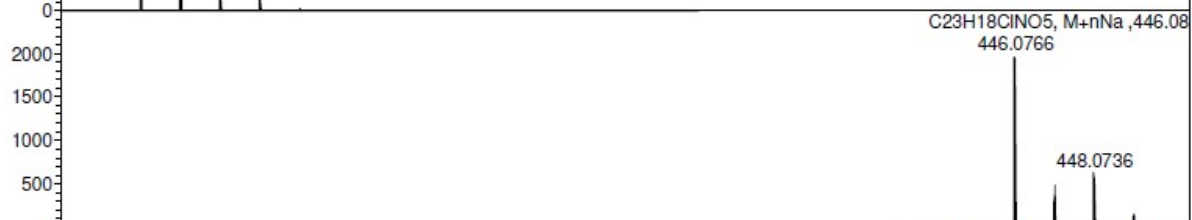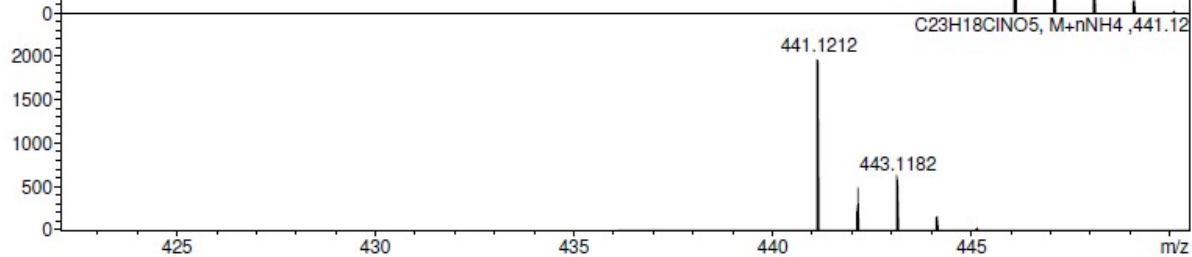

# HRMS for compound 4o

## Acquisition Parameter

|             |            |                      |          |                  |           |
|-------------|------------|----------------------|----------|------------------|-----------|
| Source Type | ESI        | Ion Polarity         | Positive | Set Nebulizer    | 0.4 Bar   |
| Focus       | Not active |                      |          | Set Dry Heater   | 180 °C    |
| Scan Begin  | 50 m/z     | Set Capillary        | 4500 V   | Set Dry Gas      | 4.0 l/min |
| Scan End    | 2500 m/z   | Set End Plate Offset | -500 V   | Set Divert Valve | Waste     |

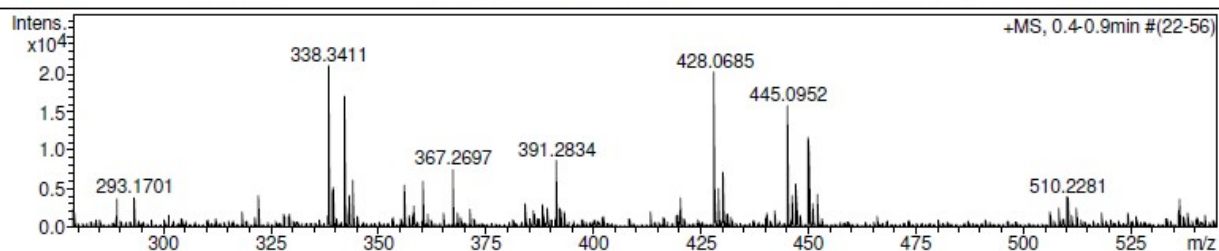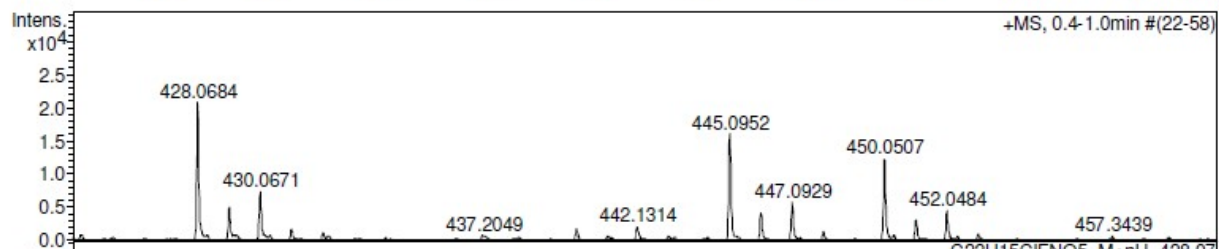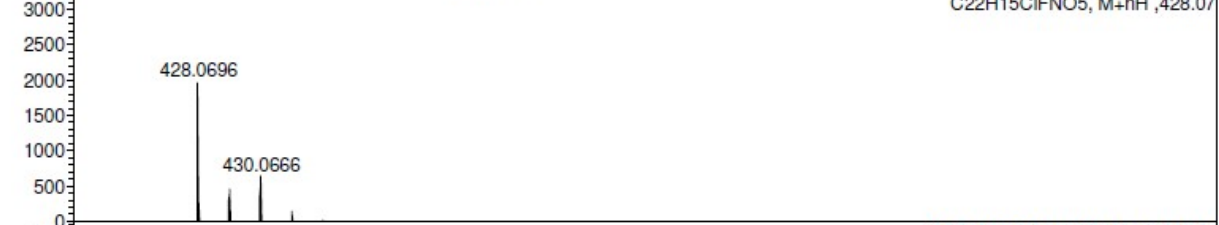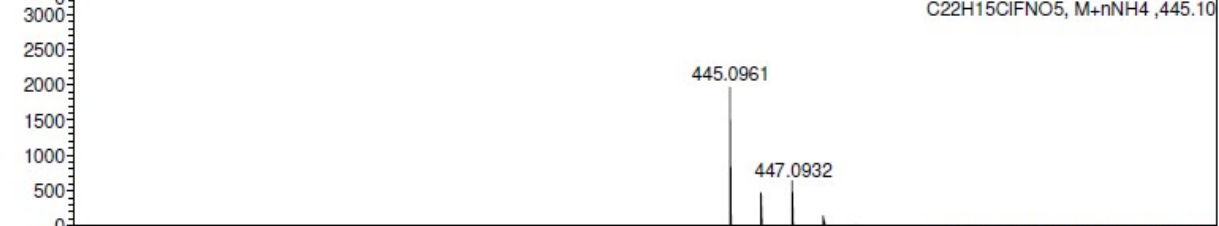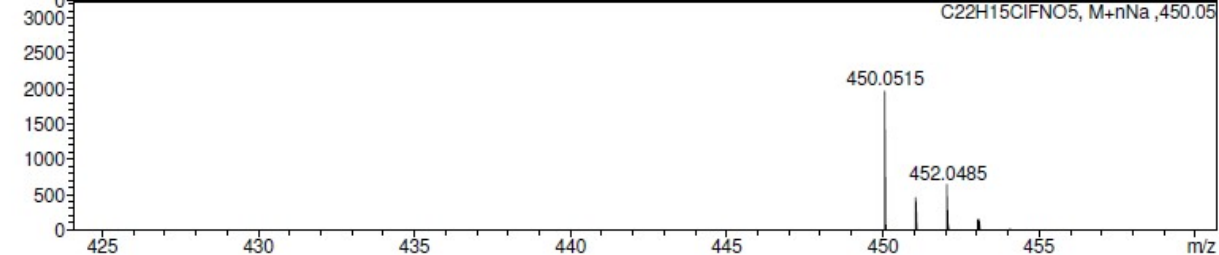

# HRMS for compound 4p

## Acquisition Parameter

|             |            |                      |          |                  |           |
|-------------|------------|----------------------|----------|------------------|-----------|
| Source Type | ESI        | Ion Polarity         | Positive | Set Nebulizer    | 0.4 Bar   |
| Focus       | Not active |                      |          | Set Dry Heater   | 180 °C    |
| Scan Begin  | 50 m/z     | Set Capillary        | 4500 V   | Set Dry Gas      | 4.0 l/min |
| Scan End    | 2500 m/z   | Set End Plate Offset | -500 V   | Set Divert Valve | Waste     |

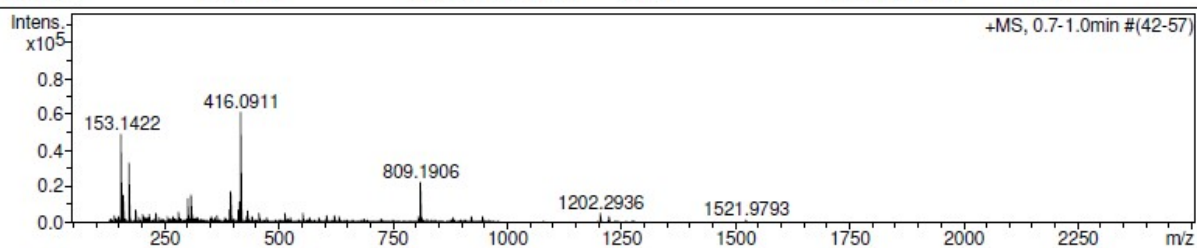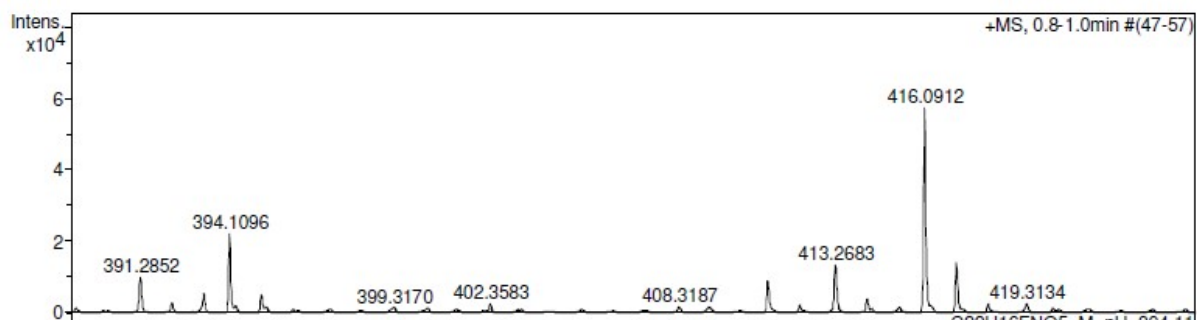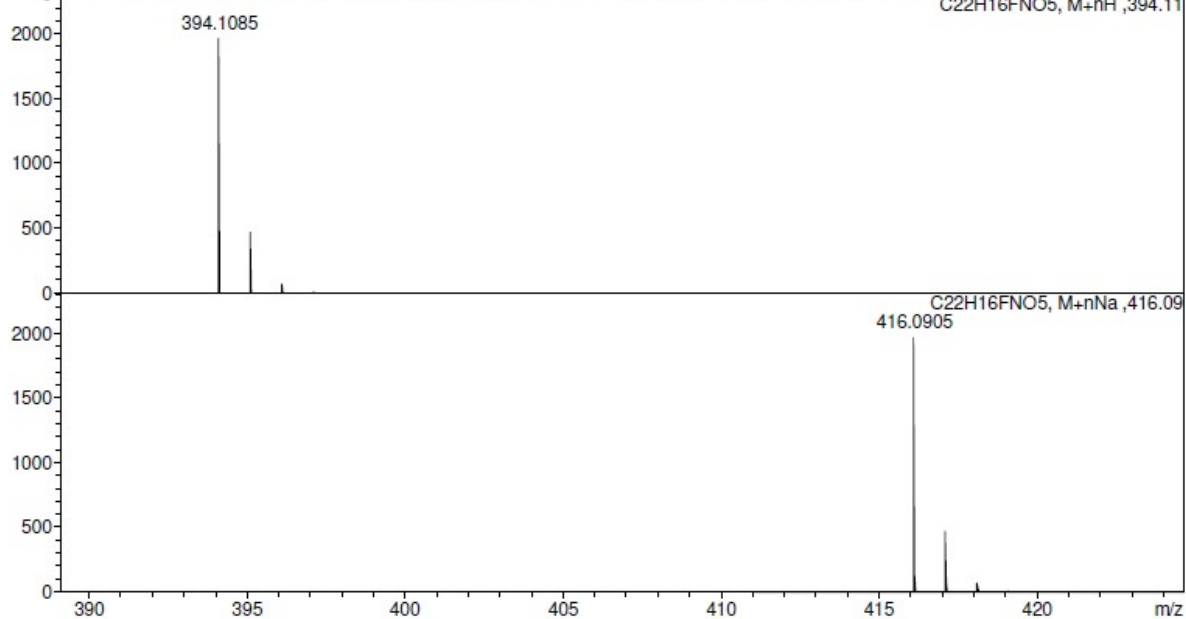

# HRMS for compound 7

## Acquisition Parameter

|             |            |                      |          |                  |           |
|-------------|------------|----------------------|----------|------------------|-----------|
| Source Type | ESI        | Ion Polarity         | Positive | Set Nebulizer    | 0.4 Bar   |
| Focus       | Not active |                      |          | Set Dry Heater   | 180 °C    |
| Scan Begin  | 50 m/z     | Set Capillary        | 4500 V   | Set Dry Gas      | 4.0 l/min |
| Scan End    | 3000 m/z   | Set End Plate Offset | -500 V   | Set Divert Valve | Waste     |

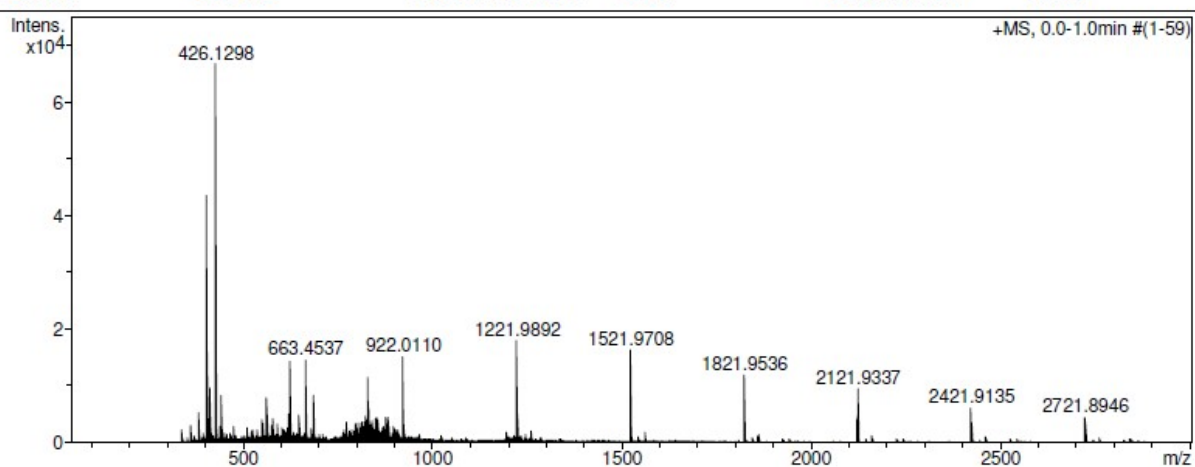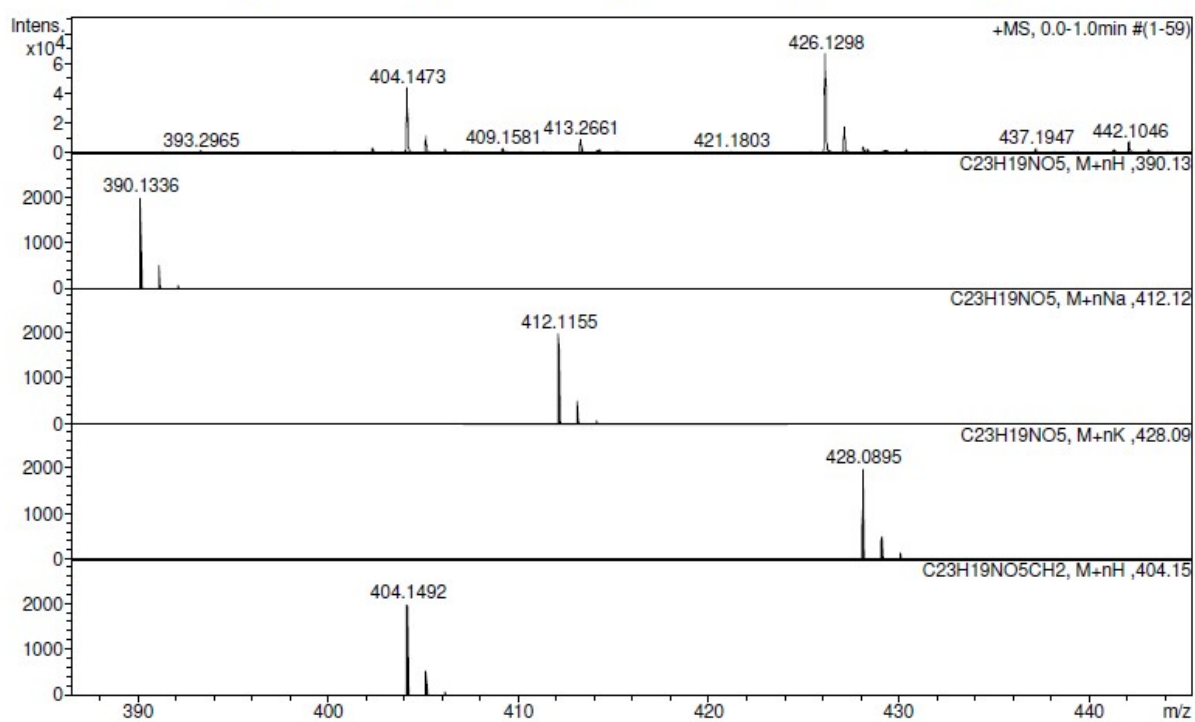

# HRMS for compound 10

## Acquisition Parameter

|             |            |                      |          |                  |           |
|-------------|------------|----------------------|----------|------------------|-----------|
| Source Type | ESI        | Ion Polarity         | Positive | Set Nebulizer    | 0.4 Bar   |
| Focus       | Not active |                      |          | Set Dry Heater   | 180 °C    |
| Scan Begin  | 50 m/z     | Set Capillary        | 4500 V   | Set Dry Gas      | 4.0 l/min |
| Scan End    | 2000 m/z   | Set End Plate Offset | -500 V   | Set Divert Valve | Waste     |

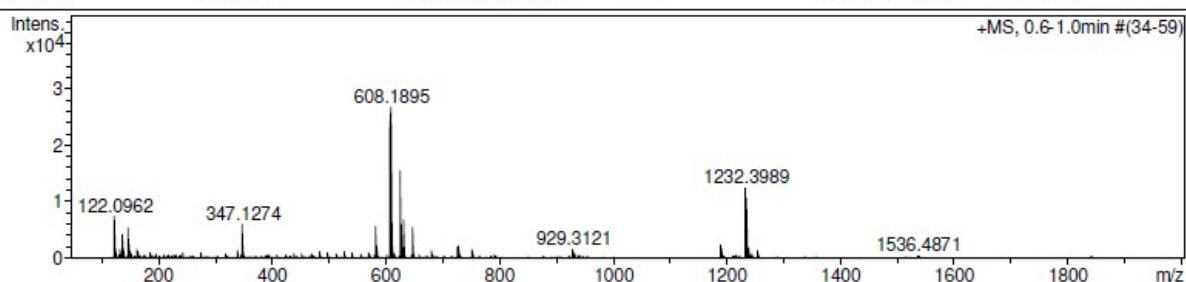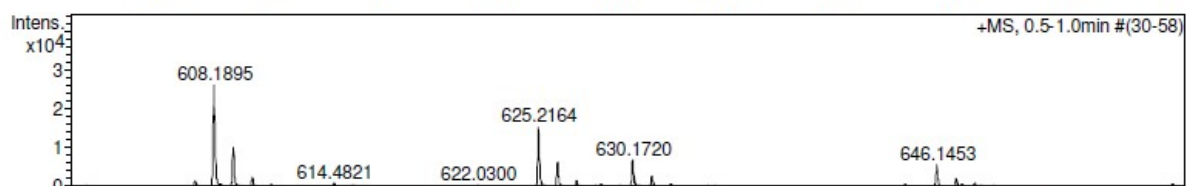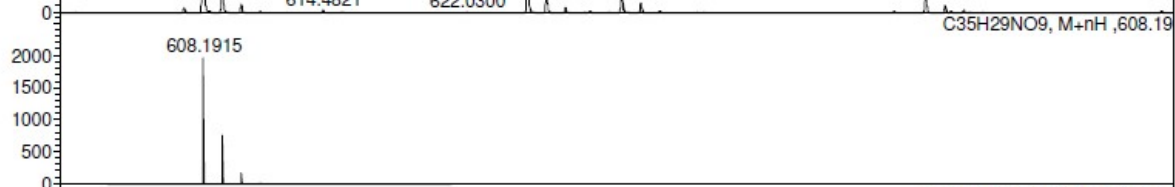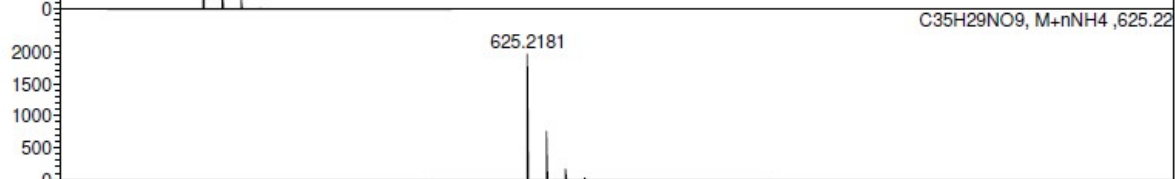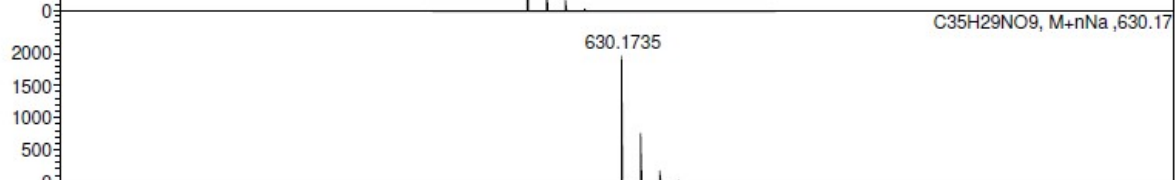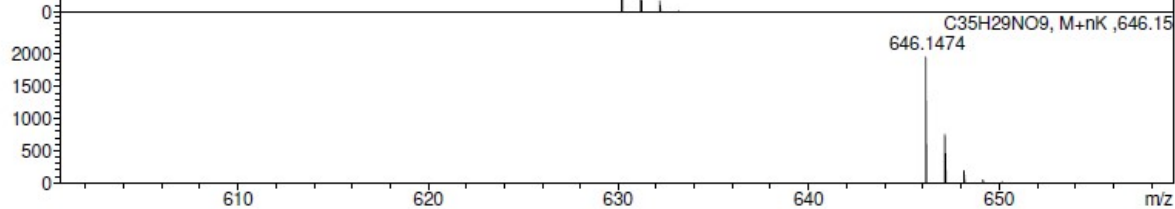



## 6. X-ray crystallographic data and refinement details for compound 4a

X-ray diffraction data were collected at 100K on a four-circle Rigaku Synergy S diffractometer equipped with a HyPix6000HE area-detector (kappa geometry, shutterless  $\omega$ -scan technique), using monochromatized Cu  $K_{\alpha}$ -radiation. The intensity data were integrated and corrected for absorption and decay by the CrysAlisPro program.<sup>2</sup> The structure was solved by direct methods using SHELXT<sup>3</sup> and refined on  $F^2$  using SHELXL-2018<sup>4</sup> in the OLEX2 program.<sup>5</sup> All non-hydrogen atoms were refined with individual anisotropic displacement parameters. Locations of hydroxy hydrogen atom (H5) was found from the electron density-difference map; this hydrogen atom was refined with individual isotropic displacement parameters. All other hydrogen atoms were placed in ideal calculated positions and refined as riding atoms with relative isotropic displacement parameters.

**Table S1.** Crystal data and structure refinement for **4a**.

---

|                                   |                                                  |                   |
|-----------------------------------|--------------------------------------------------|-------------------|
| Identification code               | <b>4a</b>                                        |                   |
| Empirical formula                 | C <sub>27</sub> H <sub>24</sub> N O <sub>6</sub> |                   |
| Formula weight                    | 458.47                                           |                   |
| Temperature                       | 100.0(3) K                                       |                   |
| Wavelength                        | 1.54184 Å                                        |                   |
| Crystal system                    | Monoclinic                                       |                   |
| Space group                       | P 2 <sub>1</sub> /c                              |                   |
| Unit cell dimensions              | a = 17.2259(2) Å                                 | α = 90°.          |
|                                   | b = 19.8037(2) Å                                 | β = 94.1260(10)°. |
|                                   | c = 7.83380(10) Å                                | γ = 90°.          |
| Volume                            | 2665.47(5) Å <sup>3</sup>                        |                   |
| Z                                 | 4                                                |                   |
| Density (calculated)              | 1.142 g/cm <sup>3</sup>                          |                   |
| Absorption coefficient            | 0.666 mm <sup>-1</sup>                           |                   |
| F(000)                            | 964                                              |                   |
| Crystal size                      | 0.17 x 0.06 x 0.06 mm <sup>3</sup>               |                   |
| Theta range for data collection   | 2.572 to 77.064°.                                |                   |
| Index ranges                      | -21 ≤ h ≤ 21, -16 ≤ k ≤ 24, -9 ≤ l ≤ 9           |                   |
| Reflections collected             | 33501                                            |                   |
| Independent reflections           | 5572 [R(int) = 0.0342]                           |                   |
| Observed reflections              | 4965                                             |                   |
| Completeness to theta = 67.684°   | 99.9 %                                           |                   |
| Absorption correction             | Semi-empirical from equivalents                  |                   |
| Max. and min. transmission        | 1.00000 and 0.78302                              |                   |
| Refinement method                 | Full-matrix least-squares on F <sup>2</sup>      |                   |
| Data / restraints / parameters    | 5572 / 3 / 314                                   |                   |
| Goodness-of-fit on F <sup>2</sup> | 1.041                                            |                   |
| Final R indices [I > 2σ(I)]       | R1 = 0.0480, wR2 = 0.1347                        |                   |
| R indices (all data)              | R1 = 0.0519, wR2 = 0.1377                        |                   |
| Extinction coefficient            | 0.00104(17)                                      |                   |
| Largest diff. peak and hole       | 0.221 and -0.207 e.Å <sup>-3</sup>               |                   |
| CCDC                              | 2304109                                          |                   |

---

**Table S2.** Atomic coordinates ( $\times 10^4$ ) and equivalent isotropic displacement parameters ( $\text{\AA}^2 \times 10^3$ ) for **4a**.  $U(\text{eq})$  is defined as one third of the trace of the orthogonalized  $U_{ij}$  tensor.

|       | x        | y       | z        | $U(\text{eq})$ |
|-------|----------|---------|----------|----------------|
| O(1)  | 5421(1)  | 5492(1) | 6876(1)  | 42(1)          |
| O(2)  | 4196(1)  | 5612(1) | 7771(2)  | 47(1)          |
| O(3)  | 5450(1)  | 3258(1) | 7213(1)  | 38(1)          |
| O(4)  | 5140(1)  | 2190(1) | 6617(2)  | 46(1)          |
| O(5)  | 6483(1)  | 1730(1) | 8437(2)  | 46(1)          |
| O(6)  | 8906(1)  | 5505(1) | 4640(2)  | 56(1)          |
| N(1)  | 4882(1)  | 4606(1) | 8004(2)  | 40(1)          |
| C(1)  | 5961(1)  | 4963(1) | 6915(2)  | 40(1)          |
| C(2)  | 5637(1)  | 4418(1) | 7615(2)  | 39(1)          |
| C(3)  | 4766(1)  | 5263(1) | 7572(2)  | 41(1)          |
| C(4)  | 6719(1)  | 5114(1) | 6316(2)  | 40(1)          |
| C(5)  | 7152(1)  | 4618(1) | 5532(2)  | 44(1)          |
| C(6)  | 7872(1)  | 4766(1) | 4997(2)  | 48(1)          |
| C(7)  | 8183(1)  | 5416(1) | 5222(2)  | 46(1)          |
| C(8)  | 7763(1)  | 5910(1) | 5990(2)  | 45(1)          |
| C(9)  | 7036(1)  | 5761(1) | 6533(2)  | 42(1)          |
| C(10) | 9234(1)  | 6165(1) | 4796(3)  | 68(1)          |
| C(11) | 5946(1)  | 3741(1) | 7969(2)  | 37(1)          |
| C(12) | 5599(1)  | 2580(1) | 7329(2)  | 37(1)          |
| C(13) | 6317(1)  | 2391(1) | 8298(2)  | 36(1)          |
| C(14) | 6791(1)  | 2865(1) | 9035(2)  | 38(1)          |
| C(15) | 6607(1)  | 3573(1) | 8887(2)  | 37(1)          |
| C(16) | 7159(1)  | 4077(1) | 9748(2)  | 44(1)          |
| C(17) | 4321(1)  | 4221(1) | 8937(2)  | 40(1)          |
| C(18) | 3675(1)  | 3921(1) | 7739(2)  | 45(1)          |
| C(19) | 3067(1)  | 3579(1) | 8725(2)  | 45(1)          |
| C(20) | 2337(1)  | 3862(1) | 8816(2)  | 51(1)          |
| C(21) | 1764(1)  | 3542(1) | 9683(2)  | 68(1)          |
| C(22) | 1931(2)  | 2931(1) | 10488(2) | 79(1)          |
| C(23) | 2654(2)  | 2657(1) | 10439(2) | 77(1)          |
| C(24) | 3226(1)  | 2968(1) | 9575(2)  | 60(1)          |
| C(25) | 9315(1)  | 4892(2) | 9063(3)  | 86(1)          |
| C(26) | 9347(1)  | 4848(2) | 10817(3) | 88(1)          |
| C(27) | 10033(1) | 4956(1) | 11756(3) | 65(1)          |

**Table S3.** Bond lengths [Å] and angles [°] for **4a**.

|              |            |                  |            |
|--------------|------------|------------------|------------|
| O(1)-C(1)    | 1.3992(17) | C(17)-H(17A)     | 0.9900     |
| O(1)-C(3)    | 1.365(2)   | C(17)-H(17B)     | 0.9900     |
| O(2)-C(3)    | 1.2190(19) | C(17)-C(18)      | 1.525(2)   |
| O(3)-C(11)   | 1.3877(16) | C(18)-H(18A)     | 0.9900     |
| O(3)-C(12)   | 1.3679(16) | C(18)-H(18B)     | 0.9900     |
| O(4)-C(12)   | 1.2119(17) | C(18)-C(19)      | 1.506(2)   |
| O(5)-H(5)    | 0.91(3)    | C(19)-C(20)      | 1.382(3)   |
| O(5)-C(13)   | 1.3432(16) | C(19)-C(24)      | 1.398(2)   |
| O(6)-C(7)    | 1.367(2)   | C(20)-H(20)      | 0.9500     |
| O(6)-C(10)   | 1.426(2)   | C(20)-C(21)      | 1.390(3)   |
| N(1)-C(2)    | 1.407(2)   | C(21)-H(21)      | 0.9500     |
| N(1)-C(3)    | 1.3558(18) | C(21)-C(22)      | 1.386(3)   |
| N(1)-C(17)   | 1.467(2)   | C(22)-H(22)      | 0.9500     |
| C(1)-C(2)    | 1.350(2)   | C(22)-C(23)      | 1.361(4)   |
| C(1)-C(4)    | 1.451(2)   | C(23)-H(23)      | 0.9500     |
| C(2)-C(11)   | 1.4605(18) | C(23)-C(24)      | 1.380(3)   |
| C(4)-C(5)    | 1.402(2)   | C(24)-H(24)      | 0.9500     |
| C(4)-C(9)    | 1.398(2)   | C(25)-H(25)      | 0.9500     |
| C(5)-H(5A)   | 0.9500     | C(25)-C(26)      | 1.374(2)   |
| C(5)-C(6)    | 1.369(2)   | C(25)-C(27)#1    | 1.366(2)   |
| C(6)-H(6)    | 0.9500     | C(26)-H(26)      | 0.9500     |
| C(6)-C(7)    | 1.400(2)   | C(26)-C(27)      | 1.364(2)   |
| C(7)-C(8)    | 1.381(2)   | C(27)-H(27)      | 0.9500     |
| C(8)-H(8)    | 0.9500     | C(3)-O(1)-C(1)   | 108.10(11) |
| C(8)-C(9)    | 1.384(2)   | C(12)-O(3)-C(11) | 122.82(11) |
| C(9)-H(9)    | 0.9500     | C(13)-O(5)-H(5)  | 112.8(15)  |
| C(10)-H(10A) | 0.9800     | C(7)-O(6)-C(10)  | 117.10(15) |
| C(10)-H(10B) | 0.9800     | C(2)-N(1)-C(17)  | 128.50(12) |
| C(10)-H(10C) | 0.9800     | C(3)-N(1)-C(2)   | 108.84(12) |
| C(11)-C(15)  | 1.344(2)   | C(3)-N(1)-C(17)  | 122.15(13) |
| C(12)-C(13)  | 1.453(2)   | O(1)-C(1)-C(4)   | 116.83(12) |
| C(13)-C(14)  | 1.346(2)   | C(2)-C(1)-O(1)   | 108.30(14) |
| C(14)-H(14)  | 0.9500     | C(2)-C(1)-C(4)   | 134.78(14) |
| C(14)-C(15)  | 1.4399(19) | N(1)-C(2)-C(11)  | 122.14(13) |
| C(15)-C(16)  | 1.5046(19) | C(1)-C(2)-N(1)   | 106.92(13) |
| C(16)-H(16A) | 0.9800     | C(1)-C(2)-C(11)  | 130.95(15) |
| C(16)-H(16B) | 0.9800     | O(2)-C(3)-O(1)   | 124.06(13) |
| C(16)-H(16C) | 0.9800     | O(2)-C(3)-N(1)   | 128.11(15) |

|                     |            |                     |            |
|---------------------|------------|---------------------|------------|
| N(1)-C(3)-O(1)      | 107.82(13) | C(15)-C(16)-H(16A)  | 109.5      |
| C(5)-C(4)-C(1)      | 121.11(13) | C(15)-C(16)-H(16B)  | 109.5      |
| C(9)-C(4)-C(1)      | 120.13(14) | C(15)-C(16)-H(16C)  | 109.5      |
| C(9)-C(4)-C(5)      | 118.75(15) | H(16A)-C(16)-H(16B) | 109.5      |
| C(4)-C(5)-H(5A)     | 119.8      | H(16A)-C(16)-H(16C) | 109.5      |
| C(6)-C(5)-C(4)      | 120.36(14) | H(16B)-C(16)-H(16C) | 109.5      |
| C(6)-C(5)-H(5A)     | 119.8      | N(1)-C(17)-H(17A)   | 109.2      |
| C(5)-C(6)-H(6)      | 119.8      | N(1)-C(17)-H(17B)   | 109.2      |
| C(5)-C(6)-C(7)      | 120.35(16) | N(1)-C(17)-C(18)    | 111.97(12) |
| C(7)-C(6)-H(6)      | 119.8      | H(17A)-C(17)-H(17B) | 107.9      |
| O(6)-C(7)-C(6)      | 115.23(15) | C(18)-C(17)-H(17A)  | 109.2      |
| O(6)-C(7)-C(8)      | 124.82(15) | C(18)-C(17)-H(17B)  | 109.2      |
| C(8)-C(7)-C(6)      | 119.96(16) | C(17)-C(18)-H(18A)  | 109.4      |
| C(7)-C(8)-H(8)      | 120.1      | C(17)-C(18)-H(18B)  | 109.4      |
| C(7)-C(8)-C(9)      | 119.78(14) | H(18A)-C(18)-H(18B) | 108.0      |
| C(9)-C(8)-H(8)      | 120.1      | C(19)-C(18)-C(17)   | 111.32(12) |
| C(4)-C(9)-H(9)      | 119.6      | C(19)-C(18)-H(18A)  | 109.4      |
| C(8)-C(9)-C(4)      | 120.80(15) | C(19)-C(18)-H(18B)  | 109.4      |
| C(8)-C(9)-H(9)      | 119.6      | C(20)-C(19)-C(18)   | 120.81(14) |
| O(6)-C(10)-H(10A)   | 109.5      | C(20)-C(19)-C(24)   | 118.32(17) |
| O(6)-C(10)-H(10B)   | 109.5      | C(24)-C(19)-C(18)   | 120.87(17) |
| O(6)-C(10)-H(10C)   | 109.5      | C(19)-C(20)-H(20)   | 119.3      |
| H(10A)-C(10)-H(10B) | 109.5      | C(19)-C(20)-C(21)   | 121.37(18) |
| H(10A)-C(10)-H(10C) | 109.5      | C(21)-C(20)-H(20)   | 119.3      |
| H(10B)-C(10)-H(10C) | 109.5      | C(20)-C(21)-H(21)   | 120.4      |
| O(3)-C(11)-C(2)     | 110.29(12) | C(22)-C(21)-C(20)   | 119.3(2)   |
| C(15)-C(11)-O(3)    | 121.92(12) | C(22)-C(21)-H(21)   | 120.4      |
| C(15)-C(11)-C(2)    | 127.79(13) | C(21)-C(22)-H(22)   | 120.2      |
| O(3)-C(12)-C(13)    | 115.85(12) | C(23)-C(22)-C(21)   | 119.6(2)   |
| O(4)-C(12)-O(3)     | 118.82(13) | C(23)-C(22)-H(22)   | 120.2      |
| O(4)-C(12)-C(13)    | 125.32(13) | C(22)-C(23)-H(23)   | 119.2      |
| O(5)-C(13)-C(12)    | 117.56(12) | C(22)-C(23)-C(24)   | 121.6(2)   |
| O(5)-C(13)-C(14)    | 121.69(13) | C(24)-C(23)-H(23)   | 119.2      |
| C(14)-C(13)-C(12)   | 120.74(13) | C(19)-C(24)-H(24)   | 120.1      |
| C(13)-C(14)-H(14)   | 119.3      | C(23)-C(24)-C(19)   | 119.8(2)   |
| C(13)-C(14)-C(15)   | 121.40(13) | C(23)-C(24)-H(24)   | 120.1      |
| C(15)-C(14)-H(14)   | 119.3      | C(26)-C(25)-H(25)   | 119.7      |
| C(11)-C(15)-C(14)   | 117.26(13) | C(27)#1-C(25)-H(25) | 119.7      |
| C(11)-C(15)-C(16)   | 123.97(13) | C(27)#1-C(25)-C(26) | 120.61(19) |
| C(14)-C(15)-C(16)   | 118.77(13) | C(25)-C(26)-H(26)   | 120.0      |

|                     |          |                     |            |
|---------------------|----------|---------------------|------------|
| C(27)-C(26)-C(25)   | 120.0(2) | C(26)-C(27)-C(25)#1 | 119.40(18) |
| C(27)-C(26)-H(26)   | 120.0    | C(26)-C(27)-H(27)   | 120.3      |
| C(25)#1-C(27)-H(27) | 120.3    |                     |            |

Symmetry transformations used to generate equivalent atoms:

#1 -x+2,-y+1,-z+2

**Table S4.** Anisotropic displacement parameters ( $\text{\AA}^2 \times 10^3$ ) for **4a**. The anisotropic displacement factor exponent takes the form:  $-2\pi^2 [h^2 a^{*2} U^{11} + \dots + 2 h k a^* b^* U^{12}]$

|       | U <sup>11</sup> | U <sup>22</sup> | U <sup>33</sup> | U <sup>23</sup> | U <sup>13</sup> | U <sup>12</sup> |
|-------|-----------------|-----------------|-----------------|-----------------|-----------------|-----------------|
| O(1)  | 58(1)           | 22(1)           | 42(1)           | 4(1)            | -9(1)           | 0(1)            |
| O(2)  | 57(1)           | 26(1)           | 56(1)           | 1(1)            | -10(1)          | 3(1)            |
| O(3)  | 49(1)           | 22(1)           | 42(1)           | 0(1)            | -8(1)           | -1(1)           |
| O(4)  | 54(1)           | 26(1)           | 56(1)           | -4(1)           | -12(1)          | -3(1)           |
| O(5)  | 55(1)           | 22(1)           | 58(1)           | -1(1)           | -12(1)          | 2(1)            |
| O(6)  | 61(1)           | 54(1)           | 53(1)           | 3(1)            | 2(1)            | -8(1)           |
| N(1)  | 51(1)           | 22(1)           | 44(1)           | 3(1)            | -7(1)           | -1(1)           |
| C(1)  | 58(1)           | 22(1)           | 36(1)           | 0(1)            | -9(1)           | 1(1)            |
| C(2)  | 52(1)           | 25(1)           | 38(1)           | 1(1)            | -7(1)           | -2(1)           |
| C(3)  | 54(1)           | 26(1)           | 42(1)           | 0(1)            | -10(1)          | 0(1)            |
| C(4)  | 60(1)           | 27(1)           | 31(1)           | 3(1)            | -7(1)           | -3(1)           |
| C(5)  | 66(1)           | 30(1)           | 35(1)           | 0(1)            | -5(1)           | -3(1)           |
| C(6)  | 67(1)           | 38(1)           | 38(1)           | 0(1)            | -1(1)           | 1(1)            |
| C(7)  | 58(1)           | 45(1)           | 34(1)           | 4(1)            | -6(1)           | -6(1)           |
| C(8)  | 65(1)           | 34(1)           | 36(1)           | 2(1)            | -8(1)           | -10(1)          |
| C(9)  | 64(1)           | 29(1)           | 33(1)           | 1(1)            | -7(1)           | -4(1)           |
| C(10) | 70(1)           | 61(1)           | 73(1)           | 1(1)            | 4(1)            | -20(1)          |
| C(11) | 50(1)           | 22(1)           | 39(1)           | 0(1)            | -4(1)           | -4(1)           |
| C(12) | 49(1)           | 23(1)           | 38(1)           | 0(1)            | -2(1)           | -1(1)           |
| C(13) | 49(1)           | 23(1)           | 38(1)           | 2(1)            | -1(1)           | 1(1)            |
| C(14) | 46(1)           | 29(1)           | 39(1)           | 2(1)            | -5(1)           | 0(1)            |
| C(15) | 49(1)           | 26(1)           | 36(1)           | 1(1)            | -3(1)           | -4(1)           |

|       |        |        |       |       |        |        |
|-------|--------|--------|-------|-------|--------|--------|
| C(16) | 55(1)  | 30(1)  | 45(1) | 1(1)  | -10(1) | -6(1)  |
| C(17) | 53(1)  | 26(1)  | 38(1) | 1(1)  | -8(1)  | -1(1)  |
| C(18) | 57(1)  | 36(1)  | 38(1) | 2(1)  | -10(1) | -5(1)  |
| C(19) | 64(1)  | 33(1)  | 34(1) | 3(1)  | -13(1) | -12(1) |
| C(20) | 66(1)  | 46(1)  | 38(1) | 5(1)  | -6(1)  | -11(1) |
| C(21) | 76(1)  | 80(1)  | 48(1) | -5(1) | 1(1)   | -29(1) |
| C(22) | 118(2) | 78(2)  | 41(1) | 0(1)  | 0(1)   | -60(2) |
| C(23) | 132(2) | 50(1)  | 45(1) | 16(1) | -25(1) | -42(1) |
| C(24) | 91(1)  | 36(1)  | 49(1) | 8(1)  | -24(1) | -13(1) |
| C(25) | 70(1)  | 121(2) | 63(1) | 13(1) | -15(1) | -12(1) |
| C(26) | 65(1)  | 137(2) | 63(1) | 22(1) | -1(1)  | 3(1)   |
| C(27) | 75(1)  | 70(1)  | 49(1) | 3(1)  | -4(1)  | 19(1)  |

**Table S5.** Hydrogen coordinates ( $\times 10^4$ ) and isotropic displacement parameters ( $\text{\AA}^2 \times 10^3$ ) for **4a**

|        | x        | y        | z        | U(eq) |
|--------|----------|----------|----------|-------|
| H(5)   | 6102(14) | 1464(13) | 7940(30) | 76(7) |
| H(5A)  | 6945     | 4176     | 5370     | 53    |
| H(6)   | 8162     | 4426     | 4471     | 57    |
| H(8)   | 7973     | 6351     | 6145     | 54    |
| H(9)   | 6748     | 6102     | 7060     | 51    |
| H(10A) | 8897     | 6486     | 4142     | 102   |
| H(10B) | 9751     | 6165     | 4350     | 102   |
| H(10C) | 9280     | 6299     | 6004     | 102   |
| H(14)  | 7256     | 2729     | 9666     | 46    |
| H(16A) | 7296     | 3934     | 10930    | 66    |
| H(16B) | 6909     | 4521     | 9751     | 66    |
| H(16C) | 7632     | 4103     | 9126     | 66    |
| H(17A) | 4089     | 4522     | 9772     | 48    |
| H(17B) | 4597     | 3853     | 9584     | 48    |
| H(18A) | 3428     | 4283     | 7020     | 53    |
| H(18B) | 3901     | 3588     | 6971     | 53    |
| H(20)  | 2225     | 4283     | 8274     | 61    |
| H(21)  | 1264     | 3741     | 9723     | 82    |

|       |       |      |       |     |
|-------|-------|------|-------|-----|
| H(22) | 1542  | 2704 | 11072 | 95  |
| H(23) | 2767  | 2242 | 11012 | 93  |
| H(24) | 3727  | 2768 | 9558  | 72  |
| H(25) | 8836  | 4816 | 8414  | 103 |
| H(26) | 8890  | 4742 | 11375 | 106 |
| H(27) | 10058 | 4927 | 12969 | 78  |

---

**Table S6.** Torsion angles [°] for **4a**.

|                        |             |                         |             |
|------------------------|-------------|-------------------------|-------------|
| O(1)-C(1)-C(2)-N(1)    | 0.53(15)    | C(2)-C(11)-C(15)-C(14)  | -179.26(14) |
| O(1)-C(1)-C(2)-C(11)   | -179.34(13) | C(2)-C(11)-C(15)-C(16)  | 0.4(3)      |
| O(1)-C(1)-C(4)-C(5)    | -149.06(13) | C(3)-O(1)-C(1)-C(2)     | 0.43(15)    |
| O(1)-C(1)-C(4)-C(9)    | 31.68(18)   | C(3)-O(1)-C(1)-C(4)     | -176.65(12) |
| O(3)-C(11)-C(15)-C(14) | 1.1(2)      | C(3)-N(1)-C(2)-C(1)     | -1.32(16)   |
| O(3)-C(11)-C(15)-C(16) | -179.27(13) | C(3)-N(1)-C(2)-C(11)    | 178.57(13)  |
| O(3)-C(12)-C(13)-O(5)  | -179.90(12) | C(3)-N(1)-C(17)-C(18)   | 85.16(17)   |
| O(3)-C(12)-C(13)-C(14) | 0.6(2)      | C(4)-C(1)-C(2)-N(1)     | 176.86(15)  |
| O(4)-C(12)-C(13)-O(5)  | -0.9(2)     | C(4)-C(1)-C(2)-C(11)    | -3.0(3)     |
| O(4)-C(12)-C(13)-C(14) | 179.65(15)  | C(4)-C(5)-C(6)-C(7)     | -0.2(2)     |
| O(5)-C(13)-C(14)-C(15) | -179.70(13) | C(5)-C(4)-C(9)-C(8)     | -0.2(2)     |
| O(6)-C(7)-C(8)-C(9)    | -179.88(13) | C(5)-C(6)-C(7)-O(6)     | 179.98(13)  |
| N(1)-C(2)-C(11)-O(3)   | 54.64(17)   | C(5)-C(6)-C(7)-C(8)     | 0.1(2)      |
| N(1)-C(2)-C(11)-C(15)  | -125.04(17) | C(6)-C(7)-C(8)-C(9)     | 0.0(2)      |
| N(1)-C(17)-C(18)-C(19) | -175.07(12) | C(7)-C(8)-C(9)-C(4)     | 0.1(2)      |
| C(1)-O(1)-C(3)-O(2)    | 177.62(13)  | C(9)-C(4)-C(5)-C(6)     | 0.3(2)      |
| C(1)-O(1)-C(3)-N(1)    | -1.25(15)   | C(10)-O(6)-C(7)-C(6)    | 178.12(15)  |
| C(1)-C(2)-C(11)-O(3)   | -125.50(16) | C(10)-O(6)-C(7)-C(8)    | -2.0(2)     |
| C(1)-C(2)-C(11)-C(15)  | 54.8(2)     | C(11)-O(3)-C(12)-O(4)   | -179.26(13) |
| C(1)-C(4)-C(5)-C(6)    | -179.00(13) | C(11)-O(3)-C(12)-C(13)  | -0.15(19)   |
| C(1)-C(4)-C(9)-C(8)    | 179.10(13)  | C(12)-O(3)-C(11)-C(2)   | 179.57(12)  |
| C(2)-N(1)-C(3)-O(1)    | 1.59(15)    | C(12)-O(3)-C(11)-C(15)  | -0.7(2)     |
| C(2)-N(1)-C(3)-O(2)    | -177.23(14) | C(12)-C(13)-C(14)-C(15) | -0.2(2)     |
| C(2)-N(1)-C(17)-C(18)  | -103.99(16) | C(13)-C(14)-C(15)-C(11) | -0.6(2)     |
| C(2)-C(1)-C(4)-C(5)    | 34.8(2)     | C(13)-C(14)-C(15)-C(16) | 179.72(14)  |
| C(2)-C(1)-C(4)-C(9)    | -144.41(17) | C(17)-N(1)-C(2)-C(1)    | -173.14(13) |



|                         |             |                           |         |
|-------------------------|-------------|---------------------------|---------|
| C(17)-N(1)-C(2)-C(11)   | 6.7(2)      | C(20)-C(19)-C(24)-C(23)   | 1.6(2)  |
| C(17)-N(1)-C(3)-O(1)    | 174.03(11)  | C(20)-C(21)-C(22)-C(23)   | 0.9(3)  |
| C(17)-N(1)-C(3)-O(2)    | -4.8(2)     | C(21)-C(22)-C(23)-C(24)   | -1.2(3) |
| C(17)-C(18)-C(19)-C(20) | 108.20(16)  | C(22)-C(23)-C(24)-C(19)   | 0.0(3)  |
| C(17)-C(18)-C(19)-C(24) | -71.64(19)  | C(24)-C(19)-C(20)-C(21)   | -1.9(2) |
| C(18)-C(19)-C(20)-C(21) | 178.24(15)  | C(25)-C(26)-C(27)-C(25)#1 | 0.0(5)  |
| C(18)-C(19)-C(24)-C(23) | -178.56(15) | C(27)#1-C(25)-C(26)-C(27) | 0.0(5)  |
| C(19)-C(20)-C(21)-C(22) | 0.7(3)      |                           |         |

---

Symmetry transformations used to generate equivalent atoms:

#1 -x+2,-y+1,-z+2

**Table S7.** Hydrogen bonds for **4a** [Å and °].

---

| D-H...A            | d(D-H)  | d(H...A) | d(D...A)   | <(DHA) |
|--------------------|---------|----------|------------|--------|
| O(5)-H(5)...O(2)#2 | 0.91(3) | 1.84(3)  | 2.6477(15) | 147(2) |

---

Symmetry transformations used to generate equivalent atoms:

#1 -x+2,-y+1,-z+2 #2 -x+1,y-1/2,-z+3/2

## 7. References

1. A. N. Komogortsev, B. V. Lichitsky, V. G. Melekhina, D. I. Nasyrova, C. V. Milyutin, *J. Org. Chem.*, 2021, **21**, 15345-15356.
2. CrysAlisPro. Version 1.171.41. *Rigaku Oxford Diffraction*, 2021.
3. G. M. Sheldrick, *Acta Cryst.*, 2015, **A71**, 1, 3-8.
4. G. M. Sheldrick, *Acta Cryst.*, 2015, **C71**, 1, 3-8.
5. O. V. Dolomanov, L. J. Bourhis, R. J. Gildea, J. A. K. Howard, H. Puschmann, *J. Appl. Cryst.*, 2009, **42**, 2, 229-341.
